# Supplementary material for: Evidence for the Extensive Conservation of Mechanisms of Ovule Integument Development Since the Most Recent Common Ancestor of Living Angiosperms
Source: PubMed Central journal article supplement (PMC6156155; doi:10.3389/fpls.2018.01352), 2018-09-19
Supplement: Image_1.pdf [file Image_1.pdf]

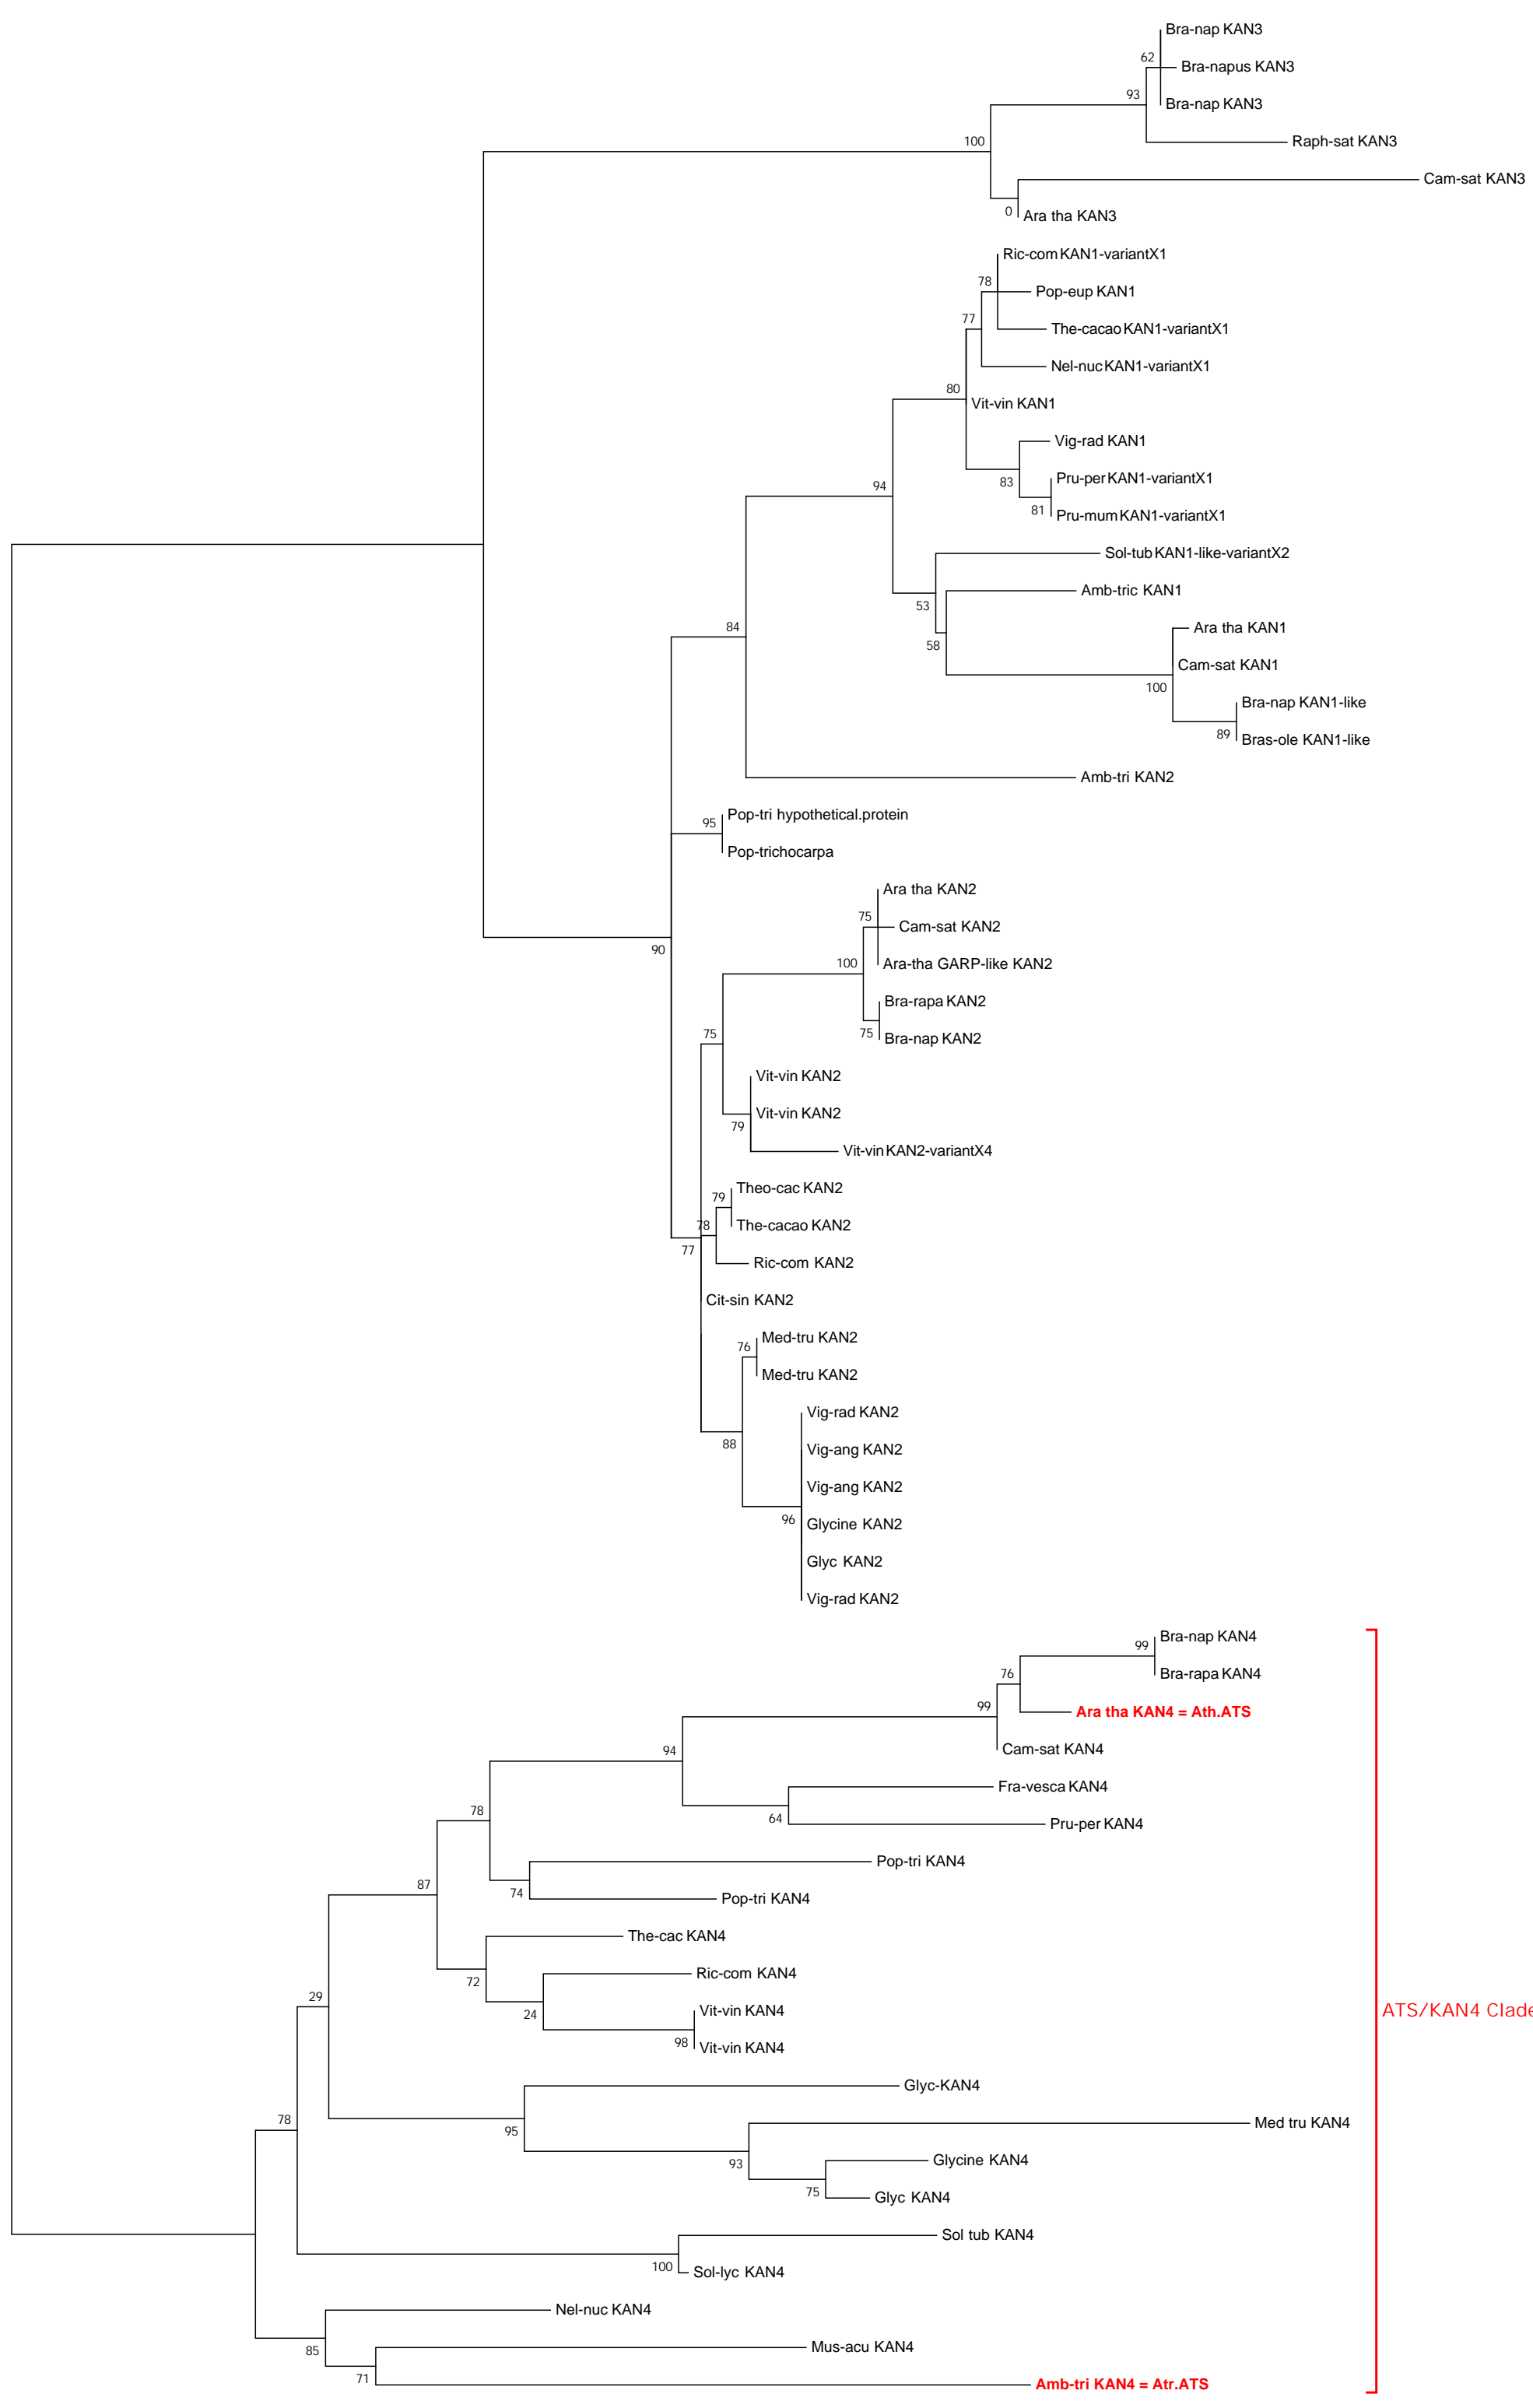

ATS/KAN4 Clade

0.1
