# Supplementary material for: Evidence for the Extensive Conservation of Mechanisms of Ovule Integument Development Since the Most Recent Common Ancestor of Living Angiosperms
Source: PubMed Central journal article supplement (PMC6156155; doi:10.3389/fpls.2018.01352), 2018-09-19
Supplement: Image_2.pdf [file Image_2.pdf]

|                              |               |            |         |           |        |       |           |        |
|------------------------------|---------------|------------|---------|-----------|--------|-------|-----------|--------|
| Ath_KAN1                     | -----MSMEG    | VFLEKTKT   | --      | NTTTTLPDL | SLHIS  | LPDI  | HOYHH     | -----  |
| Amb-tric_KAN1                | -----MPTQG    | VFMEPPRS   | --      | L-----PDL | SLHIS  | PPNS  | GATPS     | -----  |
| Cam-sat_KAN1                 | -----MSMEG    | VFLEKPKSNT | TTTTTTL | PDL       | SLHIS  | LPDI  | HHHHH     | -----  |
| Bras-ole_KAN1-like           | -----MEG      | VFLEKPKS   | --      | NTTTLPDL  | SLNIS  | LPDI  | TSKEH     | -----  |
| Bra-nap_KAN1-like            | -----MEG      | VFLEKPKS   | --      | NTTTLPDL  | SLNIS  | LPDI  | TSKEH     | -----  |
| Vit-vin_KAN1                 | -----MPLEG    | VFIEPSSN   | --      | PV---PDL  | SLHIS  | PPNN  | TSSPT     | ---SIC |
| Pru-mum_KAN1-variantX1       | -----MPLEG    | IFIEPSST   | --      | TTSPLPDL  | SLHIS  | PPNT  | SSSSL     | ---SIF |
| The-cacao_KAN1-variantX1     | -----MPLEG    | VFVEPSSN   | --      | PI---PDL  | SLHIS  | PP--  | KASTS     | ---MIC |
| Ric-com_KAN1-variantX1       | -----MPLEG    | VFIEPSSN   | --      | PV---PDL  | SLHIS  | PP-N  | TSSSS     | ---VCN |
| Pop-eup_KAN1                 | -----MPLEG    | FFIEPSSN   | --      | PV---PDL  | SLHIS  | PP-N  | ISSSS     | ---SLC |
| Pru-per_KAN1-variantX1       | -----MPLEG    | IFIEPSST   | --      | TTSPLPDL  | SLHIS  | PPNT  | SSSSL     | ---SIF |
| Sol-tub_KAN1-like-variantX2  | -----MPLEG    | VFIEPSSN   | --      | STKQIPDL  | SLNIS  | PPTN  | LDLSS     | -----  |
| Nel-nuc_KAN1-variantX1       | -----MPLEG    | MFIEPSSV   | --      | PT---PDL  | SLHIS  | PP--  | NSAPS     | ---SIC |
| Vig-rad_KAN1                 | -----MPLEG    | IFIEPTST   | --      | ST---PDL  | SLHIS  | PPST  | SSSSS     | ---LIC |
| Ath_KAN2                     | -----         | MELFPA     | --      | Q---PDL   | SLQIS  | PPNS  | KPSST     | ---WQR |
| Amb-tri_KAN2                 | -----         | MELSPA     | --      | P---PDL   | SLQIS  | LPNS  | KPTSN     | -----  |
| Ara-tha_GARP-like_KAN2       | -----         | MELFPA     | --      | Q---PDL   | SLQIS  | PPNS  | KPSST     | ---WQR |
| Cam-sat_KAN2                 | -----         | MELFPA     | --      | Q---PDL   | SLQIS  | PPNS  | KPSST     | ---WQR |
| Bra-nap_KAN2                 | -----         | MELFPA     | --      | Q---PDL   | SLQIS  | PPNS  | QPSST     | ---WQR |
| Bra-rapa_KAN2                | -----         | MELFPA     | --      | Q---PDL   | SLQIS  | PPNS  | QPSST     | ---WQR |
| Cit-sin_KAN2                 | -----         | MELFPA     | --      | Q---PDL   | SLQIS  | PPNS  | KPSST     | ---WSS |
| Vit-vin_KAN2                 | -----         | MELFPA     | --      | Q---PDL   | SLQIS  | PPNS  | KPSSG     | ---W-- |
| The-cacao_KAN2               | -----         | MELFPA     | --      | Q---PDL   | SLQIS  | PPNS  | KPSST     | ---W-- |
| Med-tru_KAN2                 | -----         | MELFPA     | --      | Q---PDL   | SLQIS  | PPNT  | KQTTTSNWK | ---KR  |
| Glycine_KAN2                 | -----         | MELFPA     | --      | Q---PDL   | SLQIS  | PPNA  | KPTSS     | ---W-- |
| Vig-rad_KAN2                 | -----         | MELFPA     | --      | Q---PDL   | SLQIS  | PPNA  | KPTST     | ---W-- |
| Vig-ang_KAN2                 | -----         | MELFPA     | --      | Q---PDL   | SLQIS  | PPNA  | KPTST     | ---W-- |
| Vit-vin_KAN2-variantX4       | -----         | MELFPA     | --      | Q---PDL   | SLQIS  | PPNS  | KPSSG     | ---W-- |
| Pop-trichocarpa              | -----         | MELFPA     | --      | Q---PDL   | SLQIS  | PPNS  | KPTST     | ---W-- |
| Ath_KAN3                     | -----         | MELFPS     | --      | Q---PDL   | YLKIS  | RRRE  | EQEEK     | -----  |
| Bra-napus_KAN3               | -----         | MELFPS     | --      | Q---PDL   | YLKIN  | RRRE  | EQEEE     | -----  |
| Bra-nap_KAN3                 | -----         | MELFPS     | --      | Q---PDL   | YLKIN  | RRRE  | EQEEE     | -----  |
| Cam-sat_KAN3                 | -----         | MELFPS     | --      | Q---PDL   | YLKIS  | RRRE  | EQEEE     | -----  |
| Raph-sat_KAN3                | -----         | MELFPS     | --      | Q---PDL   | YLKIN  | RRRE  | EQEEE     | -----  |
| Vig-ang_KAN2                 | -----         | MELFPA     | --      | Q---PDL   | SLQIS  | PPNA  | KPTST     | ---W-- |
| Med-tru_KAN2                 | -----         | MELFPA     | --      | Q---PDL   | SLQIS  | PPNT  | KQTTTSNWK | ---KR  |
| Vig-rad_KAN2                 | -----         | MELFPA     | --      | Q---PDL   | SLQIS  | PPNA  | KPTST     | ---W-- |
| Glyc_KAN2                    | -----         | MELFPA     | --      | Q---PDL   | SLQIS  | PPNA  | KPTSS     | ---W-- |
| Vit-vin_KAN2                 | -----         | MELFPA     | --      | Q---PDL   | SLQIS  | PPNS  | KPSSG     | ---W-- |
| Theo-cac_KAN2                | -----         | MELFPA     | --      | Q---PDL   | SLQIS  | PPNS  | KPSST     | ---W-- |
| Pop-tri_hypothetical.protein | -----         | MELFPA     | --      | Q---PDL   | SLQIS  | PPNS  | KPTST     | ---W-- |
| Ric-com_KAN2                 | -----         | MELFPA     | --      | Q---PDL   | SLQIS  | PPNS  | KPTST     | ---W-- |
| Ath_KAN4                     | ---MMMLES     | NSMRASNS   | --      | V---PDL   | SLQIS  | LPNY  | HAGKP     | -----  |
| Ric-com_KAN4                 | ---MFSSSN     | LMMRTASS   | --      | L---PDL   | SLQIS  | PPLA  | SDCEA     | -----  |
| Pop-tri_KAN4                 | ---MFSSSKHI   | IMRSVSPF   | -----   | -----PDL  | SLQIS  | PPSV  | EAKET     | -----  |
| Nel-nuc_KAN4                 | -----         | MRTTLPF    | -----   | -----PDL  | SLQIS  | PPTI  | PDCEG     | -----  |
| The-cac_KAN4                 | ---MFTSSN     | NIMRITPL   | -----   | -----PDL  | SLQIS  | PPSV  | SDCKA     | -----  |
| Vit-vin_KAN4                 | ---MFFSSNP    | IMGTTSPL   | -----   | -----PDL  | SLQIS  | PPSI  | SDCEV     | -----  |
| Glycine_KAN4                 | MFTNSQTVMQ    | TLSSPSA    | ---E    | ---PDL    | SLNIS  | PPSI  | SDSEA     | -----  |
| Sol-lyc_KAN4                 | -----M        | TKDTLLST   | ---V    | ---PDL    | SLQISL | PSCI  | LRSDQ     | -----  |
| Med-tru_KAN4                 | -----MH       | TLFSPLE    | -----   | -----PDL  | SLNISL | PPSI  | SDSEP     | -----  |
| Vit-vin_KAN4                 | ---MFFSSNP    | IMGTTSPL   | -----   | -----PDL  | SLQIS  | PPSI  | SDCEV     | -----  |
| Pop-tri_KAN4                 | -----         | MMRAASPF   | -----   | -----PDL  | SLQIS  | PPAV  | LEAKE     | -----  |
| Sol_tub_KAN4                 | ---M          | TTDTVLST   | ---V    | ---PDL    | SLQISL | PSSI  | LKSNO     | -----  |
| Pru-per_KAN4                 | -----         | MYLMNPIK   | RTSTSP  | LPDL      | SLQIS  | PPSA  | ADNOY     | -----  |
| Amb-tri_KAN4                 | -----         | MDMRAG     | ---HVF  | ---PDL    | SLQIS  | PPSQ  | MDLEM     | -----  |
| Fra-vesca_KAN4               | ---MMYLSSNSNP | IMRSTSSP   | ---L    | ---PDL    | SLQIS  | PPSD  | HYEIA     | -----  |
| Mus-acu_KAN4                 | -----         | MATIF      | -----   | -----PDL  | SLHIS  | PPAI  | SVDGS     | -----  |
| Glyc_KAN4                    | -----         | -----      | -----   | -----PDL  | -----  | ----- | -----     | -----  |
| Glyc_KAN4                    | ---MYTTWHTGM  | ATFAPLPE   | -----   | -----PDL  | SLNIS  | PPFI  | SDSDA     | -----  |
| Cam-sat_KAN4                 | ---MIMLESRN   | SIMRASNS   | ---V    | ---PDL    | SLQISL | LPNS  | QAGKP     | -----  |
| Bra-rapa_KAN4                | ---MIMFESR    | SSVRGSNS   | ---V    | ---PDL    | SLQIS  | LPNS  | HAEKP     | -----  |
| Bra-nap_KAN4                 | ---MIMFESR    | SSVRGSNS   | ---V    | ---PDL    | SLQIS  | LPNS  | HAEKP     | -----  |





|                              |            |     |      |            |            |     |     |     |            |            |     |   |
|------------------------------|------------|-----|------|------------|------------|-----|-----|-----|------------|------------|-----|---|
| Ath_KAN1                     | PDR        | --- | RTLN | LPHQQH     | ---        | --- | --- | --- | YNNPII     | ---        | --- | N |
| Amb-tric_KAN1                | SLP        | --- | HFQ  | NHHQH      | ---        | --- | --- | --- | ---        | ---        | P   |   |
| Cam-sat_KAN1                 | PDR        | --- | RNLN | LPHHQH     | ---        | --- | --- | --- | YNNPII     | NGG        | S   |   |
| Bras-ole_KAN1-like           | PDP        | --- | RNLN | LPHHQH     | ---        | --- | --- | --- | YNNPIL     | NG         | G   |   |
| Bra-nap_KAN1-like            | PDP        | --- | RNLN | LPHHQH     | ---        | --- | --- | --- | YNNPIL     | NG         | G   |   |
| Vit-vin_KAN1                 | QNR        | --- | HHH  | LSHHPN     | ---        | --- | --- | --- | NNLN       | H          | I   |   |
| Pru-mum_KAN1-variantX1       | HHQ        | --- | QQS  | LPLYR      | ---        | --- | --- | --- | SSNHLN     | H          | I   |   |
| The-cacao_KAN1-variantX1     | LT         | --- | HRH  | LHP        | ---        | --- | --- | --- | TNTHLN     | H          | I   |   |
| Ric-com_KAN1-variantX1       | QQS        | --- | HNH  | LHQHHH     | ---        | --- | --- | --- | NTHHLN     | H          | L   |   |
| Pop-eup_KAN1                 | QHS        | --- | HNH  | QQQQOHLHHS | NS         | --- | --- | --- | TTHHLN     | H          | I   |   |
| Pru-per_KAN1-variantX1       | HHQ        | --- | QQS  | LPLYR      | ---        | --- | --- | --- | SSNHLN     | H          | I   |   |
| Sol-tub_KAN1-like-variantX2  | NHH        | --- | HQH  | HHQSN      | ---        | --- | --- | --- | YSHMVQ     | PM         | N   |   |
| Nel-nuc_KAN1-variantX1       | HYS        | --- | QHH  | HLRHP      | ---        | --- | --- | --- | NSNRLN     | H          | L   |   |
| Vig-rad_KAN1                 | QTQ        | --- | QPH  | FHHLHHHSNT | GNASKPATAT | --- | --- | --- | TTTSSSNHLN | H          | I   |   |
| Ath_KAN2                     | QQQ        | --- | QHH  | HPQLLPNCN  | ---        | --- | --- | --- | SSNILT     | SFQFPTQQQQ | Q   |   |
| Amb-tri_KAN2                 | ---        | --- | ---  | ---        | ---        | --- | --- | --- | ---        | ---        | E   |   |
| Ara-tha_GARP-like_KAN2       | QQQ        | --- | QHH  | HPQLLPNCN  | ---        | --- | --- | --- | SSNILT     | SFQFPTQQQQ | Q   |   |
| Cam-sat_KAN2                 | QQH        | --- | QHH  | QPHLVPNCN  | ---        | --- | --- | --- | GSNILT     | SFQFPTQQQQ | Q   |   |
| Bra-nap_KAN2                 | HHQQIFTSFQ | --- | ---  | FPTQQ      | ---        | --- | --- | --- | ---        | ---        | Q   |   |
| Bra-rapa_KAN2                | HHQQIFTSFQ | --- | ---  | FPTQQ      | ---        | --- | --- | --- | ---        | ---        | Q   |   |
| Cit-sin_KAN2                 | SFHHQQNHSQ | --- | ---  | FPTHHH     | ---        | --- | --- | --- | LHQN       | QHHPVLYHQ  | Q   |   |
| Vit-vin_KAN2                 | SFQ        | --- | QSQ  | YPHHHH     | ---        | --- | --- | --- | HQHQLH     | HQ         | L   |   |
| The-cacao_KAN2               | TYH        | --- | QNQ  | FPHRHQ     | ---        | --- | --- | --- | LQHPVL     | YQ         | H   |   |
| Med-tru_KAN2                 | FHONNYFQHP | --- | ---  | HPQPLFOHHQ | ---        | --- | --- | --- | ---        | ---        | P   |   |
| Glycine_KAN2                 | PFQ        | --- | KNH  | YFHQQQQPL  | ---        | --- | --- | --- | ---        | ---        | F   |   |
| Vig-rad_KAN2                 | PFQ        | --- | QNH  | YFHQPL     | ---        | --- | --- | --- | ---        | ---        | F   |   |
| Vig-ang_KAN2                 | PFQ        | --- | QNH  | YFHQPL     | ---        | --- | --- | --- | ---        | ---        | F   |   |
| Vit-vin_KAN2-variantX4       | SFQ        | --- | QSQ  | YPHHHH     | ---        | --- | --- | --- | HQHQLH     | HQ         | L   |   |
| Pop-trichocarpa              | SFQ        | --- | QNQ  | YTHHHH     | ---        | --- | --- | --- | QQNHLH     | NHHPVLF    | Q   |   |
| Ath_KAN3                     | NNE        | --- | ATK  | INS        | ---        | --- | --- | --- | ---        | ---        | N   |   |
| Bra-napus_KAN3               | NNE        | --- | PTK  | IDH        | ---        | --- | --- | --- | ---        | ---        | N   |   |
| Bra-nap_KAN3                 | NNE        | --- | PTK  | IDH        | ---        | --- | --- | --- | ---        | ---        | N   |   |
| Bra-nap_KAN3                 | NNE        | --- | PTK  | IDH        | ---        | --- | --- | --- | ---        | ---        | N   |   |
| Cam-sat_KAN3                 | GNN        | --- | ---  | ---        | ---        | --- | --- | --- | ---        | ---        | N   |   |
| Raph-sat_KAN3                | DNK        | --- | PSK  | IDH        | ---        | --- | --- | --- | ---        | ---        | N   |   |
| Vig-ang_KAN2                 | PFQ        | --- | QNH  | YFHQPL     | ---        | --- | --- | --- | ---        | ---        | F   |   |
| Med-tru_KAN2                 | FHONNYFQHP | --- | ---  | HPQPLFOHHQ | ---        | --- | --- | --- | ---        | ---        | P   |   |
| Vig-rad_KAN2                 | PFQ        | --- | QNH  | YFHQPL     | ---        | --- | --- | --- | ---        | ---        | F   |   |
| Glyc_KAN2                    | PFQ        | --- | KNH  | YFHQQQQPL  | ---        | --- | --- | --- | ---        | ---        | F   |   |
| Vit-vin_KAN2                 | SFQ        | --- | QSQ  | YPHHHH     | ---        | --- | --- | --- | HQHQLH     | HQ         | L   |   |
| Theo-cac_KAN2                | TYH        | --- | QNQ  | FPHRH      | ---        | --- | --- | --- | N          | QLQHPVLYQH | Q   |   |
| Pop-tri_hypothetical.protein | SFQ        | --- | QNQ  | YTHHHH     | ---        | --- | --- | --- | QQNHLH     | NHHPVLF    | Q   |   |
| Ric-com_KAN2                 | SFQ        | --- | QNQ  | YPHHQPKS   | ---        | --- | --- | --- | HLLHQH     | SPHFQQQQHH | Q   |   |
| Ath_KAN4                     | ---        | --- | ---  | ---        | ---        | --- | --- | --- | ---        | ---        | N   |   |
| Ric-com_KAN4                 | ---        | --- | QER  | SYN        | ---        | --- | --- | --- | ---        | ---        | N   |   |
| Pop-tri_KAN4                 | ERS        | --- | ---  | ---        | ---        | --- | --- | --- | ---        | ---        | Y   |   |
| Nel-nuc_KAN4                 | ERA        | --- | ---  | ---        | ---        | --- | --- | --- | ---        | ---        | Y   |   |
| The-cac_KAN4                 | ---        | --- | ---  | ---        | ---        | --- | --- | --- | ---        | ---        | S   |   |
| Vit-vin_KAN4                 | ESG        | --- | ---  | ---        | ---        | --- | --- | --- | ---        | ---        | F   |   |
| Glycine_KAN4                 | ---        | --- | NLG  | HHHRE      | ---        | --- | --- | --- | ---        | ---        | P   |   |
| Sol-lyc_KAN4                 | EIKKAFNLPL | --- | ---  | IPTFE      | ---        | --- | --- | --- | ---        | ---        | F   |   |
| Med-tru_KAN4                 | PHQ        | --- | RDP  | TLRLG      | ---        | --- | --- | --- | ---        | ---        | F   |   |
| Vit-vin_KAN4                 | ESG        | --- | ---  | ---        | ---        | --- | --- | --- | ---        | ---        | F   |   |
| Pop-tri_KAN4                 | ---        | --- | QDR  | IAYNL      | ---        | --- | --- | --- | ---        | ---        | F   |   |
| Sol-tub_KAN4                 | EIKKVFNLPL | --- | ---  | IPSFE      | ---        | --- | --- | --- | ---        | ---        | F   |   |
| Pru-per_KAN4                 | ERS        | --- | TG   | Y          | ---        | --- | --- | --- | ---        | ---        | N   |   |
| Amb-tri_KAN4                 | HHR        | --- | ---  | ---        | ---        | --- | --- | --- | ---        | ---        | LM  |   |
| Fra-vesca_KAN4               | DQR        | --- | TSY  | NPAAA      | ---        | --- | --- | --- | ---        | ---        | R   |   |
| Mus-acu_KAN4                 | DQG        | --- | ---  | ---        | ---        | --- | --- | --- | ---        | ---        | R   |   |
| Glyc_KAN4                    | ---        | --- | ---  | ---        | ---        | --- | --- | --- | ---        | ---        | Y   |   |
| Glyc_KAN4                    | DTA        | --- | ---  | ---        | ---        | --- | --- | --- | ---        | ---        | Y   |   |
| Cam-sat_KAN4                 | PLL        | --- | SLG  | FDHH       | ---        | --- | --- | --- | ---        | ---        | Y   |   |
| Bra-rapa_KAN4                | HLL        | --- | SLG  | FDHHH      | ---        | --- | --- | --- | ---        | ---        | Y   |   |
| Bra-nap_KAN4                 | HLL        | --- | SLG  | FDHHH      | ---        | --- | --- | --- | ---        | ---        | Y   |   |







|                              |             |              |            |          |               |                     |
|------------------------------|-------------|--------------|------------|----------|---------------|---------------------|
| Ath_KAN1                     | -NNAYRSLQS  | SPRLKGVPLH   | HHHHHNQY   | ---      | G V V G S S   | D S S S P H H H N H |
| Amb-tric_KAN1                | ---RFGGLSS  | -ETLKSHHHN   | HHHFGGVS   | ---      | ---           | ---                 |
| Cam-sat_KAN1                 | -NNAYRSLQS  | SPRLKGVPLH   | HHHHHNHY   | ---      | G I V G S S D | S S S P H H H N H H |
| Bras-ole_KAN1-like           | -NNAYRSLQS  | SPRLRGVPLH   | HHHHHNHY   | ---      | -G            | V V G S T D S S S P |
| Bra-nap_KAN1-like            | -NNAYRSLQS  | SPRLRGVPLH   | HHHHHNHY   | ---      | -G            | V V G S T D S S S P |
| Vit-vin_KAN1                 | AA-RLNGLSS  | -DAFKSHQLH   | HHHVPSHH   | ---      | G V           | GPSE                |
| Pru-mum_KAN1-variantX1       | ---RFNGFSS  | MDPFKSSNQL   | HHHHHLHHLH | HNQYGI   | GGVG          | PISE                |
| The-cacao_KAN1-variantX1     | TI-RFNGISK  | -DAFKSHQLH   | QQPQHSY    | ---      | GI            | GSSD                |
| Ric-com_KAN1-variantX1       | TA-RFNGLSM  | -DAFKS       | ---H       | HQLHHHHH | ---           | GSGE                |
| Pop-eup_KAN1                 | TT-RFNGLSM  | -DAFKSHQLH   | HHHHHHHN   | ---      | OYGV          | GSTE                |
| Pru-per_KAN1-variantX1       | ---RFNGFSS  | MDPFKSSNHL   | HHHHHLHHLH | HNQYGI   | GGVG          | PISE                |
| Sol-tub_KAN1-like-variantX2  | ---         | ---SSYHHVPHH | ---        | LSQYGH   | LGGL          | GHNSHHENIA          |
| Nel-nuc_KAN1-variantX1       | AASRFENGLSS | -DTLKPHQLH   | SLHHPHQY   | ---      | GI            | GPSD                |
| Vig-rad_KAN1                 | AT-RFNGISG  | -EAFKSHHPL   | HHHHSSSH   | ---      | YGV-GLG       | GSHE                |
| Ath_KAN2                     | ---         | ---PNYHNHHH  | ---        | ---      | ---           | ---                 |
| Amb-tri_KAN2                 | ---         | ---SSYNFGS   | ---        | ---      | ---           | ---                 |
| Ara-tha_GARP-like_KAN2       | ---         | ---PNYHNHHH  | ---        | ---      | ---           | ---                 |
| Cam-sat_KAN2                 | ---         | ---PNYHNHHHH | H          | ---      | ---           | ---                 |
| Bra-nap_KAN2                 | ---         | ---SRVNPHHN  | HH         | ---      | ---           | ---                 |
| Bra-rapa_KAN2                | ---         | ---SRVNPHHN  | HH         | ---      | ---           | ---                 |
| Cit-sin_KAN2                 | ---         | ---SSLNSFQSQ | ---        | ---      | ---           | ---                 |
| Vit-vin_KAN2                 | ---         | ---SPFQSHH   | ---        | ---      | ---           | ---                 |
| The-cacao_KAN2               | ---         | ---SPFQS     | ---        | ---      | ---           | ---                 |
| Med-tru_KAN2                 | ---         | ---SPFQS     | ---        | ---      | ---           | ---                 |
| Glycine_KAN2                 | ---         | ---TPFHS     | ---        | ---      | ---           | ---                 |
| Vig-rad_KAN2                 | ---         | ---TPFHS     | ---        | ---      | ---           | ---                 |
| Vig-ang_KAN2                 | ---         | ---TPFHS     | ---        | ---      | ---           | ---                 |
| Vit-vin_KAN2-variantX4       | ---         | ---SPFQSHH   | ---        | ---      | ---           | ---                 |
| Pop-trichocarpa              | ---         | ---SPYQS     | ---        | ---      | ---           | ---                 |
| Ath_KAN3                     | ---         | ---FNLHNRHRR | QAQPQP     | ---      | ---           | ---                 |
| Bra-napus_KAN3               | ---         | ---PPFFFSEVN | GQHTNPSY   | ---      | ---           | ---                 |
| Bra-nap_KAN3                 | ---         | ---PPFFFSEVN | GQHANPSY   | ---      | ---           | ---                 |
| Bra-nap_KAN3                 | ---         | ---PPFFFSEVN | GQHANPSY   | ---      | ---           | ---                 |
| Cam-sat_KAN3                 | ---         | ---YNLHHRNRR | QAQPQP     | ---      | ---           | ---                 |
| Raph-sat_KAN3                | ---         | ---TPFFFSEVN | GQHANPNY   | ---      | ---           | ---                 |
| Vig-ang_KAN2                 | ---         | ---TPFHS     | ---        | ---      | ---           | ---                 |
| Med-tru_KAN2                 | ---         | ---SPFQS     | ---        | ---      | ---           | ---                 |
| Vig-rad_KAN2                 | ---         | ---TPFHS     | ---        | ---      | ---           | ---                 |
| Glyc_KAN2                    | ---         | ---TPFHS     | ---        | ---      | ---           | ---                 |
| Vit-vin_KAN2                 | ---         | ---SPFQSHH   | ---        | ---      | ---           | ---                 |
| Theo-cac_KAN2                | ---         | ---SPFQS     | ---        | ---      | ---           | ---                 |
| Pop-tri_hypothetical.protein | ---         | ---SPYQS     | ---        | ---      | ---           | ---                 |
| Ric-com_KAN2                 | ---         | ---TNI GHFQS | ---        | ---      | ---           | ---                 |
| Ath_KAN4                     | ---         | ---HHHQRR    | SNMFQPQI   | ---      | ---           | ---                 |
| Ric-com_KAN4                 | ---         | ---RNLNHHHHH | QPQI       | ---      | ---           | ---                 |
| Pop-tri_KAN4                 | ---         | ---RNLNHHHHH | QI         | ---      | ---           | ---                 |
| Nel-nuc_KAN4                 | ---         | ---PPMQLPRNL | HYLHQPQI   | ---      | ---           | ---                 |
| The-cac_KAN4                 | ---         | ---RNLNHHQH  | YQPQI      | ---      | ---           | ---                 |
| Vit-vin_KAN4                 | ---         | ---RNLHNNHHN | HQPQI      | ---      | ---           | ---                 |
| Glycine_KAN4                 | ---         | ---RSFNHHHHL | LQPHI      | ---      | ---           | ---                 |
| Sol-lyc_KAN4                 | ---         | ---THFQYHHEH | YQPQI      | ---      | ---           | ---                 |
| Med-tru_KAN4                 | ---         | ---RNFNQHFQP | HI         | ---      | ---           | ---                 |
| Vit-vin_KAN4                 | ---         | ---RNLHNNHHN | HQPQI      | ---      | ---           | ---                 |
| Pop-tri_KAN4                 | ---         | ---RNLNHLHHH | NPQI       | ---      | ---           | ---                 |
| Sol-tub_KAN4                 | ---         | ---KNFQY     | ---H       | HQHYQPQI | ---           | ---                 |
| Pru-per_KAN4                 | ---         | ---RNFSNHHFH | HPQI       | ---      | ---           | ---                 |
| Amb-tri_KAN4                 | ---         | ---DSFNGDAVI | LGLGSHHH   | ---      | ---           | L                   |
| Fra-vesca_KAN4               | ---         | ---RNFNHHHHH | HPQI       | ---      | ---           | R                   |
| Mus-acu_KAN4                 | ---         | ---HDLHHRDHH | HHHHHDQL   | ---      | ---           | R                   |
| Glyc_KAN4                    | ---         | ---          | ---        | ---      | ---           | ---                 |
| Glyc-KAN4                    | ---         | ---LSRNNFSHH | LHNYQPHT   | ---      | ---           | ---                 |
| Cam-sat_KAN4                 | ---         | ---HHQHHRH   | SNMFQPQI   | ---      | ---           | ---                 |
| Bra-rapa_KAN4                | ---         | ---PYHHHQHRS | SNMFQPQI   | ---      | ---           | ---                 |
| Bra-nap_KAN4                 | ---         | ---PYHHHQHRS | SNMFQPQI   | ---      | ---           | ---                 |



|                              |            |            |     |     |     |            |            |            |
|------------------------------|------------|------------|-----|-----|-----|------------|------------|------------|
| Ath_KAN1                     | HHHGMIRSRF | LPKM       | P   | --- | --- | TKRSMRAP   | RMRWTSSLHA | RFVHAVELLG |
| Amb-tric_KAN1                | ASSHAMRSRI | VSKL       | P   | --- | --- | TKRSMRAP   | RMRWTSTLHA | RFVHAVELLG |
| Cam-sat_KAN1                 | HHHGMIRSRF | LPKM       | P   | --- | --- | TKRSMRAP   | RMRWTSSLHA | RFVHAVELLG |
| Bras-ole_KAN1-like           | HHHGMIRSRF | LPKM       | P   | --- | --- | TKRSMRAP   | RMRWTSSLHA | RFVHAVELLG |
| Bra-nap_KAN1-like            | HHHGMIRSRF | LPKM       | P   | --- | --- | TKRSMRAP   | RMRWTSSLHA | RFVHAVELLG |
| Vit-vin_KAN1                 | S-HGMMRSRF | IPKL       | P   | --- | --- | TKRSMRAP   | RMRWTSTLHA | RFVHAVELLG |
| Pru-mum_KAN1-variantX1       | SHHGIMRSRF | LPKL       | P   | --- | --- | TKRSMRAP   | RMRWTSTLHA | RFVHAVELLG |
| The-cacao_KAN1-variantX1     | S-NGLIRSRF | LPKL       | P   | --- | --- | TKRSMRAP   | RMRWTSTLHA | RFVHAVELLG |
| Ric-com_KAN1-variantX1       | S-HGLIRSRF | LPKL       | P   | --- | --- | TKRSMRAP   | RMRWTSTLHA | RFVHAVELLG |
| Pop-eup_KAN1                 | SPHGLIRSRF | FPKL       | P   | --- | --- | TKRSMRAP   | RMRWTSTLHA | RFVHAVELLG |
| Pru-per_KAN1-variantX1       | SHHGIMRSRF | LPKL       | P   | --- | --- | TKRSMRAP   | RMRWTSTLHA | RFVHAVELLG |
| Sol-tub_KAN1-like-variantX2  | NSHSLMRSRF | LPKL       | P   | --- | --- | AKRSMRAP   | RMRWTSTLHA | RFVHAVELLG |
| Nel-nuc_KAN1-variantX1       | S-HAMIRSRF | MPKL       | P   | --- | --- | TKRSMRAP   | RMRWTSTLHA | RFVHAVELLG |
| Vig-rad_KAN1                 | S-SGLMRSRF | LPKL       | P   | --- | --- | TKRSMRAP   | RMRWTSTLHA | RFVHAVELLG |
| Ath_KAN2                     | --OTLNRARF | MPRF       | P   | --- | --- | AKRSMRAP   | RMRWTSSLHA | RFVHAVELLG |
| Amb-tri_KAN2                 | --NGGMRSRF | MTRFTA     |     |     |     | ARRSMRAP   | RMRWTSSLHA | RFVHAVELLG |
| Ara-tha_GARP-like_KAN2       | --OTLNRARF | MPRF       | P   | --- | --- | AKRSMRAP   | RMRWTSSLHA | RFVHAVELLG |
| Cam-sat_KAN2                 | --OTLNRARF | MPRF       | P   | --- | --- | AKRSMRAP   | RMRWTSSLHA | RFVHAVELLG |
| Bra-nap_KAN2                 | --OTLNRARF | MPRF       | P   | --- | --- | AKRSMRAP   | RMRWTSSLHA | RFVHAVELLG |
| Bra-rapa_KAN2                | --OTLNRARF | MPRF       | P   | --- | --- | AKRSMRAP   | RMRWTSSLHA | RFVHAVELLG |
| Cit-sin_KAN2                 | --OGLMRSRF | MSRF       | P   | --- | --- | AKRSMRAP   | RMRWTSSLHA | RFVHAVELLG |
| Vit-vin_KAN2                 | --OGLIRSRF | LSRF       | P   | --- | --- | AKRSMRAP   | RMRWTSSLHA | RFVHAVELLG |
| The-cacao_KAN2               | --OGLMRSRF | MSRF       | P   | --- | --- | AKRSMRAP   | RMRWTSSLHA | RFVHAVELLG |
| Med-tru_KAN2                 | --QALMRSRF | LSRF       | P   | --- | --- | AKRSMRAP   | RMRWTSSLHA | RFVHAVELLG |
| Glycine_KAN2                 | --QALMRSRF | LSRF       | P   | --- | --- | AKRSMRAP   | RMRWTSSLHA | RFVHAVELLG |
| Vig-rad_KAN2                 | --QALMRSRF | LSRF       | P   | --- | --- | AKRSMRAP   | RMRWTSSLHA | RFVHAVELLG |
| Vig-ang_KAN2                 | --QALMRSRF | LSRF       | P   | --- | --- | AKRSMRAP   | RMRWTSSLHA | RFVHAVELLG |
| Vit-vin_KAN2-variantX4       | --OGLIRSRF | LSRF       | P   | --- | --- | AKRSMRAP   | RMRWTSSLHA | RFVHAVELLG |
| Pop-trichocarpa              | --QGSMSRF  | MSRF       | P   | --- | --- | AKRSMRAP   | RMRWTSSLHA | RFVHAVELLG |
| Ath_KAN3                     | -----      | -PRF       | T   | --- | --- | AKRSMRAP   | RMRWTSSLHA | RFVHAVELLG |
| Bra-napus_KAN3               | --SYNLHHRH | HRQAQPOAQR |     |     |     | LTAKRSMRAP | RMRWTSSLHA | RFVHAVELLG |
| Bra-nap_KAN3                 | --SYNLHHRH | HRQVQPOAQR |     |     |     | LTAKRSMRAP | RMRWTSSLHA | RFVHAVELLG |
| Bra-nap_KAN3                 | --SYNLHHRH | HRQVQPOAQR |     |     |     | LTAKRSMRAP | RMRWTSSLHA | RFVHAVELLG |
| Cam-sat_KAN3                 | -----      | -PRF       | T   | --- | --- | AKRSMRAP   | RMRWTSSLHA | RFVHAVELLG |
| Raph-sat_KAN3                | --SYNLHHRP | HRQAQP     | -QR |     |     | LTAKRSMRAP | RMRWTSSLHA | RFVHAVELLG |
| Vig-ang_KAN2                 | --QALMRSRF | LSRF       | P   | --- | --- | AKRSMRAP   | RMRWTSSLHA | RFVHAVELLG |
| Med-tru_KAN2                 | --QALMRSRF | LSRF       | P   | --- | --- | AKRSMRAP   | RMRWTSSLHA | RFVHAVELLG |
| Vig-rad_KAN2                 | --QALMRSRF | LSRF       | P   | --- | --- | AKRSMRAP   | RMRWTSSLHA | RFVHAVELLG |
| Glyc_KAN2                    | --QALMRSRF | LSRF       | P   | --- | --- | AKRSMRAP   | RMRWTSSLHA | RFVHAVELLG |
| Vit-vin_KAN2                 | --OGLIRSRF | LSRF       | P   | --- | --- | AKRSMRAP   | RMRWTSSLHA | RFVHAVELLG |
| Theo-cac_KAN2                | --OGLMRSRF | MSRF       | P   | --- | --- | AKRSMRAP   | RMRWTSSLHA | RFVHAVELLG |
| Pop-tri_hypothetical.protein | --QGSMSRF  | MSRF       | P   | --- | --- | AKRSMRAP   | RMRWTSSLHA | RFVHAVELLG |
| Ric-com_KAN2                 | --OGLMRSRL | MSRF       | P   | --- | --- | AKRSMRAP   | RMRWTSSLHA | RFVHAVELLG |
| Ath_KAN4                     | --YGRDFKRS | SSSMVG     |     |     |     | LKRSIRAP   | RMRWTSSLHA | RFVHAVELLG |
| Ric-com_KAN4                 | --YGRDFKRN | GRMISG     |     |     |     | VKRSIRAP   | RMRWTSSLHA | RFVHAVELLG |
| Pop-tri_KAN4                 | --YGRDFKRS | ARMING     |     |     |     | VKRSVRAP   | RMRWTSSLHA | RFVHAVELLG |
| Nel-nuc_KAN4                 | --YGRDFKRN | SRMING     |     |     |     | GKRSIRAP   | RMRWTSSLHA | RFVHAVELLG |
| The-cac_KAN4                 | --YSRDFKRN | ARMING     |     |     |     | VKRSIRAP   | RMRWTSSLHA | RFVHAVELLG |
| Vit-vin_KAN4                 | --YGRDFKRN | SRMMNG     |     |     |     | SKRSIRAP   | RMRWTSSLHA | RFVHAVELLG |
| Glycine_KAN4                 | --YGRDFKRS | ARVVNG     |     |     |     | VKRSVRAP   | RMRWTSSLHA | RFVHAVELLG |
| Sol-lyc_KAN4                 | --YGRDFKRS | SRLISG     |     |     |     | VKRSVRAP   | RMRWTSSLHA | RFVHAVELLG |
| Med-tru_KAN4                 | --YGRDFKRN | TRVVNG     |     |     |     | VKRSVRAP   | RMRWTSSLHA | RFVHAVELLG |
| Vit-vin_KAN4                 | --YGRDFKRN | SRMMNG     |     |     |     | SKRSIRAP   | RMRWTSSLHA | RFVHAVELLG |
| Pop-tri_KAN4                 | --YGGDFKRS | ARMISG     |     |     |     | VRRSKRAP   | RMRWTSSLHA | RFVHAVELLG |
| Sol-tub_KAN4                 | --YGRDFKRS | SRLISG     |     |     |     | VKRSVRAP   | RMRWTSSLHA | RFVHAVELLG |
| Pru-per_KAN4                 | --YGRDFKRN | ARTVGN     |     |     |     | VKRSIRAP   | RMRWTSSLHA | RFVHAVELLG |
| Amb-tri_KAN4                 | PALGRDFKRN | SRIMSCG    |     |     |     | SKRSMRAP   | RMRWTSSLHA | RFVHAVELLG |
| Fra-vesca_KAN4               | --YGRDFKRS | ARTVGN     |     |     |     | VKRSVRAP   | RMRWTSSLHA | RFVHAVELLG |
| Mus-acu_KAN4                 | HPQTYGFKRN | SRSAGQ     |     |     |     | GKRSVRAP   | RMRWTSSLHA | RFVHAVELLG |
| Glyc_KAN4                    | -----      | -----      |     |     |     | -----      | RMRWTSSLHA | RFVHAVELLG |
| Glyc-KAN4                    | --NTLDFKRN | ARVIHG     |     |     |     | VKRSIRAP   | RMRWTSSLHA | RFVHAVELLG |
| Cam-sat_KAN4                 | --YGRDFKRS | SSSMVG     |     |     |     | LKRSIRAP   | RMRWTSSLHA | RFVHAVELLG |
| Bra-rapa_KAN4                | --YGRDFKRT | SSSVVS     |     |     |     | LKRSIRAP   | RMRWTSSLHA | RFVHAVELLG |
| Bra-nap_KAN4                 | --YGRDFKRT | SSSVVS     |     |     |     | LKRSIRAP   | RMRWTSSLHA | RFVHAVELLG |

|                              |            |            |            |            |             |
|------------------------------|------------|------------|------------|------------|-------------|
| Ath_KAN1                     | GHERATPKSV | LELMDVKDLT | LAHVKSHLQM | YRTVKTTN-K | P--AAS----  |
| Amb-tric_KAN1                | GHERATPKSV | LELMDVKDLT | LAHVKSHLQM | YRTVKTTD-K | P--AASSGQ-  |
| Cam-sat_KAN1                 | GHERATPKSV | LELMDVKDLT | LAHVKSHLQM | YRTVKTTN-K | P--AAS----  |
| Bras-ole_KAN1-like           | GHERATPKSV | LELMDVKDLT | LAHVKSHLQM | YRTVKTTN-K | P--AAS----  |
| Bra-nap_KAN1-like            | GHERATPKSV | LELMDVKDLT | LAHVKSHLQM | YRTVKTTN-K | P--AAS----  |
| Vit-vin_KAN1                 | GHERATPKSV | LELMDVKDLT | LAHVKSHLQM | YRTVKTTD-K | P--AASSGQ-  |
| Pru-mum_KAN1-variantX1       | GHERATPKSV | LELMDVKDLT | LAHVKSHLQM | YRTVKTTD-K | P--AAS----  |
| The-cacao_KAN1-variantX1     | GHERATPKSV | LELMDVKDLT | LAHVKSHLQM | YRTVKTTD-K | P--AASSGQ-  |
| Ric-com_KAN1-variantX1       | GHERATPKSV | LELMDVKDLT | LAHVKSHLQM | YRTVKTTD-K | P--AASSGQ-  |
| Pop-eup_KAN1                 | GHERATPKSV | LELMDVKDLT | LAHVKSHLQM | YRTVKTTD-K | P--ASS----  |
| Pru-per_KAN1-variantX1       | GHERATPKSV | LELMDVKDLT | LAHVKSHLQM | YRTVKTTD-K | P--AAS----  |
| Sol-tub_KAN1-like-variantX2  | GHERATPKSV | LELMDVKDLT | LAHVKSHLQM | YRTVKTTD-K | P--AVS----  |
| Nel-nuc_KAN1-variantX1       | GHERATPKSV | LELMDVKDLT | LAHVKSHLQM | YRTVKTTD-K | P--AASSGQ-  |
| Vig-rad_KAN1                 | GHERATPKSV | LELMDVKDLT | LAHVKSHLQM | YRTVKTTD-K | P--AASSGL-  |
| Ath_KAN2                     | GHERATPKSV | LELMDVKDLT | LAHVKSHLQM | YRTVKTTD-K | A--AASSGQ-  |
| Amb-tri_KAN2                 | GHERATPKSV | LELMDVKDLT | LAHVKSHLQM | YRTVKTTD-R | A--AGSSGE-  |
| Ara-tha_GARP-like_KAN2       | GHERATPKSV | LELMDVKDLT | LAHVKSHLQM | YRTVKTTD-K | A--AASSGQ-  |
| Cam-sat_KAN2                 | GHERATPKSV | LELMDVKDLT | LAHVKSHLQM | YRTVKTTD-K | A--AASSGQ-  |
| Bra-nap_KAN2                 | GHERATPKSV | LELMDVKDLT | LAHVKSHLQM | YRTVKTTD-K | A--AASSGQ-  |
| Bra-rapa_KAN2                | GHERATPKSV | LELMDVKDLT | LAHVKSHLQM | YRTVKTTD-K | A--AASSGQ-  |
| Cit-sin_KAN2                 | GHERATPKSV | LELMDVKDLT | LAHVKSHLQM | YRTVKTTD-R | A--AASSGQ-  |
| Vit-vin_KAN2                 | GHERATPKSV | LELMDVKDLT | LAHVKSHLQM | YRTVKTTD-R | A--AASSGQ-  |
| The-cacao_KAN2               | GHERATPKSV | LELMDVKDLT | LAHVKSHLQM | YRTVKTTD-R | A--AASSGQ-  |
| Med-tru_KAN2                 | GHERATPKSV | LELMDVKDLT | LAHVKSHLQM | YRTVKTTD-R | V--GASSGQ-  |
| Glycine_KAN2                 | GHERATPKSV | LELMDVKDLT | LAHVKSHLQM | YRTVKTTD-R | A--AASSGQ-  |
| Vig-rad_KAN2                 | GHERATPKSV | LELMDVKDLT | LAHVKSHLQM | YRTVKTTD-R | A--AASSGQ-  |
| Vig-ang_KAN2                 | GHERATPKSV | LELMDVKDLT | LAHVKSHLQM | YRTVKTTD-R | A--AASSGQ-  |
| Vit-vin_KAN2-variantX4       | GHERATPKSV | LELMDVKDLT | LAHVKSHLQM | YRTVKTTD-R | A--AASSGQ-  |
| Pop-trichocarpa              | GHERATPKSV | LELMDVKDLT | LAHVKSHLQM | YRTVKTTD-R | A--AAPAL-   |
| Ath_KAN3                     | GHERATPKSV | LELMDVQDLT | LAHVKSHLQM | YRTIKSTE-K | P--TTSSGQ-  |
| Bra-napus_KAN3               | GHERATPKSV | LELMDVQDLT | LAHVKSHLQM | YRTIKSTE-K | P--TTS----  |
| Bra-nap_KAN3                 | GHERATPKSV | LELMDVQDLT | LAHVKSHLQM | YRTIKSTE-K | P--TTS----  |
| Bra-nap_KAN3                 | GHERATPKSV | LELMDVQDLT | LAHVKSHLQM | YRTIKSTE-K | P--TTS----  |
| Cam-sat_KAN3                 | GHERATPKSV | LELMDVQDLT | LAHVKSHLQM | YRTIKSTE-K | P--T-----   |
| Raph-sat_KAN3                | GHERATPKSV | LELMDVQDLT | LAHVKSHLQM | YRTIKSTE-K | P--TTS----  |
| Vig-ang_KAN2                 | GHERATPKSV | LELMDVKDLT | LAHVKSHLQM | YRTVKTTD-R | A--AASSGQ-  |
| Med-tru_KAN2                 | GHERATPKSV | LELMDVKDLT | LAHVKSHLQM | YRTVKTTD-R | V--GASSGQ-  |
| Vig-rad_KAN2                 | GHERATPKSV | LELMDVKDLT | LAHVKSHLQM | YRTVKTTD-R | A--AASSGQ-  |
| Glyc_KAN2                    | GHERATPKSV | LELMDVKDLT | LAHVKSHLQM | YRTVKTTD-R | A--AASSGQ-  |
| Vit-vin_KAN2                 | GHERATPKSV | LELMDVKDLT | LAHVKSHLQM | YRTVKTTD-R | A--AASSGQ-  |
| Theo-cac_KAN2                | GHERATPKSV | LELMDVKDLT | LAHVKSHLQM | YRTVKTTD-R | A--AASSGQ-  |
| Pop-tri_hypothetical.protein | GHERATPKSV | LELMDVKDLT | LAHVKSHLQM | YRTVKTTD-R | A--AAPAL-   |
| Ric-com_KAN2                 | GHERATPKSV | LELMDVKDLT | LAHVKSHLQM | YRTVKTTD-R | A--AASSGQ-  |
| Ath_KAN4                     | GHERATPKSV | LELMNVKDLT | LAHVKSHLQM | YRTVKCTD-K | G--SPGEGKV  |
| Ric-com_KAN4                 | GHERATPKSV | LELMNVKDLT | LAHVKSHLQM | YRTVKSTD-K | G--TGQGO-   |
| Pop-tri_KAN4                 | GHERATPKSV | LELMNVKDLT | LAHVKSHLQM | YRTVKSTD-R | G-----      |
| Nel-nuc_KAN4                 | GHERATPKSV | LELMNVKDLT | LAHVKSHLQM | YRTVKSTD-K | G--AGQGO-   |
| The-cac_KAN4                 | GHERATPKSV | LELMNVKDLT | LAHVKSHLQM | YRTVKSTD-K | G--SGQGO-   |
| Vit-vin_KAN4                 | GHERATPKSV | LELMNVKDLT | LAHVKSHLQM | YRTVKSTD-K | G--TGQGO-   |
| Glycine_KAN4                 | GHERATPKSV | LELMNVKDLT | LAHVKSHLQM | YRTVKSTD-K | GISTAGHGQ-  |
| Sol-lyc_KAN4                 | GHERATPKSV | LELMNVKDLT | LAHVKSHLQM | YRTVKSTD-K | S--AKGQGE-  |
| Med-tru_KAN4                 | GHERATPKSV | LELMNVKDLT | LAHVKSHLQM | YRTVKTTD-K | S--GAGHGI-  |
| Vit-vin_KAN4                 | GHERATPKSV | LELMNVKDLT | LAHVKSHLQM | YRTVKSTD-K | G--TGQGO-   |
| Pop-tri_KAN4                 | GHERATPKSV | LELMNVKDLT | LAHVKSHLQM | YRTVKSTD-K | G--SGQGO-   |
| Sol-tub_KAN4                 | GHERATPKSV | LELMNVKDLT | LAHVKSHLQM | YRTVKSTD-K | A--TAKGQGE- |
| Pru-per_KAN4                 | GHERATPKSV | LELMNVKDLT | LAHVKSHLQM | YRTVKSTD-K | G--TGHEGO-  |
| Amb-tri_KAN4                 | GHERATPKSV | LELMNVKDLT | LAHVKSHLQM | YRTVKSTD-K | G--AGQGP-   |
| Fra-vesca_KAN4               | GHERATPKSV | LELMNVKDLT | LAHVKSHLQM | YRTVKSTD-K | G--TGHEGQL  |
| Mus-acu_KAN4                 | GHERATPKSV | LELMNVKDLT | LAHVKSHLQM | YRTVKSTD-R | G--AAGQGO-  |
| Glyc_KAN4                    | GHERATPKSV | LELMNVKDLT | LAHVKSHLQM | YRTVKSTD-K | GITAAGHGQ-  |
| Glyc-KAN4                    | GHERATPKSV | LELMNVKDLT | LSHVKSHLQM | YRTVKSSD-K | G--SAGYGO-  |
| Cam-sat_KAN4                 | GHERATPKSV | LELMNVKDLT | LAHVKSHLQM | YRTVKCTD-K | G--SSGEGKV  |
| Bra-rapa_KAN4                | GHERATPKSV | LELMNVKDLT | LAHVKSHLQM | YRTVKCTD-K | R--SSGERKV  |
| Bra-nap_KAN4                 | GHERATPKSV | LELMNVKDLT | LAHVKSHLQM | YRTVKCTD-K | R--SSGERKV  |

|                              |     |            |       |            |       |      |        |            |            |            |            |         |     |
|------------------------------|-----|------------|-------|------------|-------|------|--------|------------|------------|------------|------------|---------|-----|
| Ath_KAN1                     | --- | SDG        | ---   | SGE        | ---   | EE   | MGING  | NEVH       | HQSSTDQRAQ | ---        | ---        | SD      |     |
| Amb-tric_KAN1                | --- | SDG        | FD    | S          | GS    | AAGE | DD     | FVAGNLAGSD | RNLGAFGF   | ---        | ---        | QG      |     |
| Cam-sat_KAN1                 | --- | SDG        | ---   | SGE        | ---   | EE   | MGING  | NEVH       | HQSSTDQRAQ | ---        | ---        | SD      |     |
| Bras-ole_KAN1-like           | --- | SDG        | ---   | SGE        | ---   | EE   | MGING  | NDVH       | HQSSTDQKAQ | ---        | ---        | SD      |     |
| Bra-nap_KAN1-like            | --- | SDG        | ---   | SGE        | ---   | EE   | MGING  | NDVH       | HQSSTDQKAQ | ---        | ---        | SD      |     |
| Vit-vin_KAN1                 | --- | SDG        | ---   | SGE        | ---   | ED   | I      | SPM        | GN         | ---        | ASDCGLCR   | FTDORGA | SE  |
| Pru-mum_KAN1-variantX1       | --- | SDG        | ---   | SGE        | ---   | DD   | ILSPI  | GSAT       | DLHGLRSPHQ | FPEORGP    | ---        | SD      |     |
| The-cacao_KAN1-variantX1     | --- | SDG        | ---   | SGE        | ---   | ED   | ISTAVS | GSER       | GLRGLIDQ   | ---        | ---        | IG      |     |
| Ric-com_KAN1-variantX1       | --- | SDG        | ---   | SGE        | ---   | ED   | I      | STM        | GS         | G          | NDRGSGGLRR | FSDORGA | SD  |
| Pop-eup_KAN1                 | --- | SDG        | ---   | SGE        | ---   | ED   | M      | SPI        | GSYG       | TANERGLL   | ---        | ORGVQSD |     |
| Pru-per_KAN1-variantX1       | --- | SDG        | ---   | SGE        | ---   | DD   | ILSPI  | GSAT       | DLHGLRSPHQ | FPEORGP    | ---        | SD      |     |
| Sol-tub_KAN1-like-variantX2  | --- | SDG        | ---   | SGE        | ---   | DD   | L      | TTI        | GSTG       | G          | GDRAGLIGQ  | FMDORGG | SD  |
| Nel-nuc_KAN1-variantX1       | --- | SDG        | ---   | SGE        | ---   | ED   | F      | SPA        | AT         | ---        | NNDLNLR    | FIDORGS | TD  |
| Vig-rad_KAN1                 | --- | SDG        | ---   | SGE        | ---   | DD   | I      | SPM        | GSSG       | GMRQFS     | DORS       | L       | SD  |
| Ath_KAN2                     | --- | SDVYE      | N     | GSSGD      | NNSD  | DD   | WMFDM  | NRKS       | RDSEEL     | ---        | TN         | P       | LE  |
| Amb-tri_KAN2                 | --- | IDIFG      | N     | GTPGEI     | SNEI  | ---  | LLENM  | ---        | ---        | ---        | ---        | ---     | TQ  |
| Ara-tha_GARP-like_KAN2       | --- | SDVYE      | N     | GSSGD      | NNSD  | DD   | WMFDM  | NRKS       | RDSEEL     | ---        | TN         | P       | LE  |
| Cam-sat_KAN2                 | --- | SDVYE      | N     | GSSGD      | NNSD  | DD   | WMFDM  | NRKS       | RDSEEL     | ---        | TN         | P       | LE  |
| Bra-nap_KAN2                 | --- | SDVYE      | N     | GSSGD      | NNSD  | DD   | WMFDM  | NRKS       | RDTDEL     | ---        | TN         | P       | LE  |
| Bra-rapa_KAN2                | --- | SDVYE      | N     | GSSGD      | NNSD  | DD   | WMFDM  | NRKS       | RDTDEL     | ---        | TN         | P       | LE  |
| Cit-sin_KAN2                 | --- | SDAFE      | N     | GSSGD      | TSED  | ---  | IMFGI  | QHPR       | R          | PETSSI     | IQ         | ---     | QG  |
| Vit-vin_KAN2                 | --- | SDVYE      | N     | GSSGD      | TSED  | ---  | VMFDI  | QNPR       | K          | SELS       | ---        | IQ      | QG  |
| The-cacao_KAN2               | --- | SDAFE      | N     | GSSGD      | TSED  | ---  | LMFDI  | QNPR       | R          | SEIS       | ---        | VQ      | QG  |
| Med-tru_KAN2                 | --- | SDVYD      | N     | GSSGD      | NSDD  | ---  | IMFDI  | NSSR       | R          | SSDLS      | ---        | IK      | QG  |
| Glycine_KAN2                 | --- | SDVYD      | N     | GSSGD      | TSDD  | ---  | LMFDI  | KSSR       | R          | SDLS       | ---        | VK      | QG  |
| Vig-rad_KAN2                 | --- | SDVYD      | N     | GSSGD      | TSDD  | ---  | LMFDI  | KSSR       | R          | SDVS       | ---        | IK      | QG  |
| Vig-ang_KAN2                 | --- | SDVYD      | N     | GSSGD      | TSDD  | ---  | LMFDI  | KSSR       | R          | SDVS       | ---        | IK      | QG  |
| Vit-vin_KAN2-variantX4       | --- | SDVYE      | N     | GSSGD      | TSED  | ---  | VMFDI  | QNPR       | K          | SELS       | ---        | IQ      | QG  |
| Pop-trichocarpa              | --- | SDVFD      | N     | GSSGD      | TSED  | ---  | LVFDI  | ENPR       | R          | SEMS       | ---        | MQ      | QG  |
| Ath_KAN3                     | --- | SDC        | ---   | ENG        | S     | ---  | ---    | QV         | NSER       | EARNL      | ---        | ---     | --- |
| Bra-napus_KAN3               | --- | SDIGQSD    | ---   | TCENE      | ---   | ---  | LKV    | NSER       | QARDL      | ---        | ---        | ---     | --- |
| Bra-nap_KAN3                 | --- | SDIGQSD    | ---   | TCENE      | ---   | ---  | LKV    | NSER       | HARDL      | ---        | ---        | ---     | --- |
| Bra-nap_KAN3                 | --- | SDIGQSD    | ---   | TCENE      | ---   | ---  | LKV    | NSER       | HARDL      | ---        | ---        | ---     | --- |
| Cam-sat_KAN3                 | --- | ---        | ---   | ---        | ---   | ---  | ---    | ---        | ---        | ---        | ---        | ---     | --- |
| Raph-sat_KAN3                | --- | SDIEQSD    | ---   | TFEKE      | ---   | ---  | LKV    | NSER       | QAKDL      | ---        | ---        | ---     | --- |
| Vig-ang_KAN2                 | --- | SDVYD      | N     | GSSGD      | TSDD  | ---  | LMFDI  | KSSR       | R          | SDVS       | ---        | IK      | QG  |
| Med-tru_KAN2                 | --- | SDVYD      | N     | GSSGD      | NSDD  | ---  | IMFDI  | NSSR       | R          | SSDLS      | ---        | IK      | QG  |
| Vig-rad_KAN2                 | --- | SDVYD      | N     | GSSGD      | TSDD  | ---  | LMFDI  | KSSR       | R          | SDVS       | ---        | IK      | QG  |
| Glyc_KAN2                    | --- | SDVYD      | N     | GSSGD      | TSDD  | ---  | LMFDI  | KSSR       | R          | SDLS       | ---        | VK      | QG  |
| Vit-vin_KAN2                 | --- | SDVYE      | N     | GSSGD      | TSED  | ---  | VMFDI  | QNPR       | K          | SELS       | ---        | IQ      | QG  |
| Theo-cac_KAN2                | --- | SDAFE      | N     | GSSGD      | TSED  | ---  | LMFDI  | QNPR       | R          | SEIS       | ---        | VQ      | QG  |
| Pop-tri_hypothetical.protein | --- | SDVFD      | N     | GSSGD      | TSED  | ---  | LVFDI  | ENPR       | R          | SEMS       | ---        | MQ      | QG  |
| Ric-com_KAN2                 | --- | SDIFD      | N     | GSSGD      | TSED  | ---  | LMFEI  | QNSR       | R          | SDIS       | ---        | MQ      | QG  |
| Ath_KAN4                     | --- | EKEAEQRIED | ---   | NNNNE      | ---   | EAD  | EGTDT  | NSPN       | SSSVQK     | ---        | ---        | ---     | TQ  |
| Ric-com_KAN4                 | --- | TDMGL      | K     | QRAGI      | ---   | VD   | VDAGV  | SAGK       | ADANPCCSLN | PPPPP      | ---        | ---     | TP  |
| Pop-tri_KAN4                 | --- | PGKLYC     | ---   | LSSGKADANN | ---   | ---  | LPQPL  | NNPP       | SPPPP      | ---        | ---        | ---     | --- |
| Nel-nuc_KAN4                 | --- | TELGL      | N     | QRSGV      | ---   | IE   | VDAGL  | SSCEK      | TDPNPYSLNP | P          | ---        | ---     | LP  |
| The-cac_KAN4                 | --- | TEMSL      | N     | QRTGI      | ---   | VD   | LDGRL  | SCGK       | ADTNPSYSLK | ---        | ---        | ---     | PS  |
| Vit-vin_KAN4                 | --- | TDMGL      | N     | QRTGI      | ---   | ---  | ---    | QV         | ELGG       | LSCDKADATP | SF         | ---     | SS  |
| Glycine_KAN4                 | --- | TDIGL      | N     | PRLGI      | ---   | NV   | HLHAP  | SPIC       | DTPNLPDPIQ | N          | ---        | ---     | SQ  |
| Sol-lyc_KAN4                 | --- | INIFL      | N     | QNNGI      | ---   | ---  | ---    | NN         | GEYE       | KSCEEIDALS | QPSTISQMA  | ---     | --- |
| Med-tru_KAN4                 | --- | L          | QTOGI | ---        | ---   | ---  | NIVPL  | HGAN       | SSADERPNLP | Q          | ---        | ---     | --- |
| Vit-vin_KAN4                 | --- | TDMGL      | N     | QRTGI      | GOVEL | ---  | GGLSC  | DKAD       | ATPSFS     | ---        | ---        | ---     | SN  |
| Pop-tri_KAN4                 | --- | TDMGL      | N     | QRARI      | ---   | ---  | ---    | ---        | ---        | ---        | ---        | ---     | --- |
| Sol_tub_KAN4                 | --- | IKIFL      | N     | QNNGI      | ---   | ---  | ---    | ---        | ---        | ---        | ---        | ---     | --- |
| Pru-per_KAN4                 | --- | TDMGL      | N     | QKPGI      | ---   | ---  | ---    | ---        | ---        | ---        | ---        | ---     | --- |
| Amb-tri_KAN4                 | --- | TEMGL      | R     | QRSRV      | ---   | ---  | ---    | ---        | ---        | ---        | ---        | ---     | --- |
| Fra-vesca_KAN4               | --- | MDMGL      | D     | QNPGN      | ---   | NN   | VQVNG  | SALP       | CDSEKA     | ---        | ---        | ---     | ID  |
| Mus-acu_KAN4                 | --- | AEMCF      | N     | QRRGM      | ---   | EE   | VEGGL  | SCDK       | AGNEITPPCS | S          | ---        | ---     | LS  |
| Glyc_KAN4                    | --- | TGIGLMN    | ---   | PRPGI      | ---   | NV   | HLHAL  | SPIC       | DTPNLPDPIQ | S          | ---        | ---     | SH  |
| Glyc_KAN4                    | --- | TGIGL      | S     | QKPGI      | ---   | VD   | LHGVL  | ACER       | PDLPOPLLK  | ---        | ---        | ---     | FQ  |
| Cam-sat_KAN4                 | --- | EKEAEORMED | ---   | NNNNE      | ---   | EAD  | EGTDT  | NSPN       | SSSVQK     | ---        | ---        | ---     | TQ  |
| Bra-rapa_KAN4                | --- | EKEAEQKTED | ---   | NNNNN      | ---   | ED   | ADADP  | ISPN       | SSSVQK     | ---        | ---        | ---     | TQ  |
| Bra-nap_KAN4                 | --- | EKEAEQKTED | ---   | NNNNN      | ---   | ED   | ADADP  | ISPN       | SSSVQK     | ---        | ---        | ---     | TQ  |

|                              |            |          |      |     |      |            |     |            |            |
|------------------------------|------------|----------|------|-----|------|------------|-----|------------|------------|
| Ath_KAN1                     | DT         | SLHQET   | DISS | --- | TQ   | PRWSNSS    | -R  | ETWPLSNCS  | SDIDTMRIS  |
| Amb-tric_KAN1                | EVDY       | SSTNNS   | HPPA | --- | P    | SLWSNSSS   | -R  | GPWLHTTSS  | -DAESIRSPA |
| Cam-sat_KAN1                 | DT         | SLHQEI   | DISS | --- | TQ   | PRWSNSS    | -R  | ETWPLSNCS  | SDMDTLIRTS |
| Bras-ole_KAN1-like           | DT         | SPHQEI   | DFPS | --- | TQ   | PRWSNSS    | -R  | ETWPLSNYS  | SDVDTMIRTS |
| Bra-nap_KAN1-like            | DT         | SPHQEI   | DFPS | --- | TQ   | PRWSNSS    | -R  | ETWPLSNYS  | SDVDTMIRTS |
| Vit-vin_KAN1                 | GS         | LQOEI    | DYPS | --- | T    | NLWSNSSSSR |     | EAWLQONSS  | -EMDGLK-TA |
| Pru-mum_KAN1-variantX1       | RS         | SVQPD    | DYTS | --- | ST   | TLWSNSSSSR |     | EAFPHSSH   | -DMDGLT-PV |
| The-cacao_KAN1-variantX1     | TS         | DGSLQEL  | DYPC | -   | NPTT | TLWSNSS    | -R  | EAWLHANSN  | -DIDGVRGPL |
| Ric-com_KAN1-variantX1       | GS         | VQOEM    | SYPS | --- | TAT  | TLWSNSSSSR |     | EAWPOTNSN  | -DPDGIR-EA |
| Pop-eup_KAN1                 | GS         | PVQDM    | DYPS | ST  | TTT  | TLWSNSSSSR |     | EAWPOTNSN  | -EMDGHR-QG |
| Pru-per_KAN1-variantX1       | RS         | SVQPD    | DYTS | --- | ST   | TLWSNSSSSR |     | EAFPHSSH   | -DMDGLT-PV |
| Sol-tub_KAN1-like-variantX2  | GS         | LQPEP    | DYPS | --- | TATN | TLWSNSSSSR |     | EGWLQANSN  | -DTNVLMRSH |
| Nel-nuc_KAN1-variantX1       | GS         | VQQDT    | DYPS | --- | TA   | TLWSNSSSSR |     | GSWLQTNSS  | -DMDGHR-SE |
| Vig-rad_KAN1                 | RP         | VQQDM    | DYSS | --- | AN   | TLWSNSSSSR |     | ELWQONSSN  | -DINGFR-PP |
| Ath_KAN2                     | KS         | ---      | ---  | --- | NG   | ---        | --- | LWTNSS     | -G         |
| Amb-tri_KAN2                 | RP         | PLQHGL   | DYCN | --- | ---  | MWSNSSS    | -R  | RNWLQAKSR  | -DSMSMS-PS |
| Ara-tha_GARP-like_KAN2       | KS         | ---      | ---  | --- | NG   | ---        | --- | LWTNSS     | -G         |
| Cam-sat_KAN2                 | KG         | ---      | ---  | --- | NG   | ---        | --- | LWTNSS     | -G         |
| Bra-nap_KAN2                 | KS         | ---      | ---  | --- | NG   | ---        | --- | RWTNSS     | -G         |
| Bra-rapa_KAN2                | KS         | ---      | ---  | --- | NG   | ---        | --- | RWTNSS     | -G         |
| Cit-sin_KAN2                 | RA         | ---      | ---  | --- | SNG  | ---        | --- | LWSNSS     | -R         |
| Vit-vin_KAN2                 | RP         | NVHQEK   | DYHG | --- | ---  | LWSNSS     | -R  | EAWLHGKQR  | -DSGGNT-P  |
| The-cacao_KAN2               | RP         | SSNAHQDK | EYHG | --- | ---  | LWSNSS     | -R  | EAWLHGKPK  | -DSARNL-P  |
| Med-tru_KAN2                 | RS         | SVNQDK   | ECYG | --- | ---  | LWSNSS     | -R  | EAWLHGKPKV | -DSIGNM-Q  |
| Glycine_KAN2                 | RS         | SVNQDK   | EYHG | --- | ---  | LWGNSS     | -R  | EAWLHGKTKT | -DSVGNV-PF |
| Vig-rad_KAN2                 | RS         | SVNQDK   | DYHG | --- | ---  | LWGNSS     | -R  | EAWLHGKTRT | -DSVGNV-P  |
| Vig-ang_KAN2                 | RS         | SVNQDK   | DCHG | --- | ---  | LWGNSS     | -R  | EAWLHGKTKT | -DSVGNV-P  |
| Vit-vin_KAN2-variantX4       | RP         | NVHQEK   | DYHG | --- | ---  | LWSNSS     | -R  | EAWLHGKQR  | -DSGGNTPTL |
| Pop-trichocarpa              | RP         | NAHQDK   | DYQA | --- | ---  | LWSNSS     | -R  | EAWLHGKLLK | -DSDGNL-P  |
| Ath_KAN3                     | ---        | ---      | ---  | --- | TG   | ---        | --- | LWNNSS     | -S         |
| Bra-napus_KAN3               | ---        | ---      | ---  | --- | OG   | ---        | --- | LWTNSS     | -S         |
| Bra-nap_KAN3                 | ---        | ---      | ---  | --- | OG   | ---        | --- | LWSNSS     | -S         |
| Bra-nap_KAN3                 | ---        | ---      | ---  | --- | ---  | ---        | --- | LWSNSS     | -S         |
| Cam-sat_KAN3                 | ---        | ---      | ---  | --- | ---  | ---        | --- | ---        | ---        |
| Raph-sat_KAN3                | ---        | ---      | ---  | --- | OG   | ---        | --- | LWNNSS     | -S         |
| Vig-ang_KAN2                 | RS         | SVNQDK   | DCHG | --- | ---  | LWGNSS     | -R  | EAWLHGKTKT | -DSVGNV-P  |
| Med-tru_KAN2                 | RS         | SVNQDK   | ECYG | --- | ---  | LWSNSS     | -R  | EAWLHGKPKV | -DSIGNM-Q  |
| Vig-rad_KAN2                 | RS         | SVNQDK   | DYHG | --- | ---  | LWGNSS     | -R  | EAWLHGKTRT | -DSVGNV-P  |
| Glyc_KAN2                    | RS         | SVNQDK   | EYHG | --- | ---  | LWGNSS     | -R  | EAWLHGKTKT | -DSVGNV-PF |
| Vit-vin_KAN2                 | RP         | NVHQEK   | DYHG | --- | ---  | LWSNSS     | -R  | EAWLHGKQR  | -DSGGNT-P  |
| Theo-cac_KAN2                | RP         | SSNAHQDK | EYHG | --- | ---  | LWSNSS     | -R  | EAWLHGKPK  | -DSARNL-P  |
| Pop-tri_hypothetical.protein | RP         | NAHQDK   | DYQA | --- | ---  | LWSNSS     | -R  | EAWLHGKLLK | -DSDGNL-P  |
| Ric-com_KAN2                 | RP         | NGHHDK   | DYQG | --- | ---  | LWSNSS     | -R  | EAWLHVSKK  | -DSCGNL-T  |
| Ath_KAN4                     | RA         | ---      | ---  | --- | ---  | SWSST      | -K  | EVRSISTQA  | YSHLGT-HH  |
| Ric-com_KAN4                 | TTPI       | PSVQKT   | QIRG | --- | ---  | SWSSMETR   |     | DINIS      | -NSEALIYSH |
| Pop-tri_KAN4                 | ---        | ---      | ---  | --- | ---  | PLSSTQ     | -K  | NQRLGDEK   | ---        |
| Nel-nuc_KAN4                 | KS         | ---      | ---  | --- | PRG  | ---        | --- | SWSSME     | -T         |
| The-cac_KAN4                 | SPSSQPTPQR | TQSG     | ---  | --- | ---  | SWLSST     | -K  | TNLSLSSH   | -GNGLTFKP  |
| Vit-vin_KAN4                 | NTPOPSTPQK | ISRS     | ---  | --- | ---  | SWLSM      | --- | ETNDEGRLS  | -HENGLKYSH |
| Glycine_KAN4                 | RT         | ---      | ---  | --- | ---  | PWQSSI     | --- | ETKTDNSRQE | EPEIGLTYSH |
| Sol-lyc_KAN4                 | HMRDPSSFMP | DQTN     | ---  | --- | ---  | VWSHSN     | -R  | ERTFAN     | ---        |
| Med-tru_KAN4                 | ---        | ---      | ---  | --- | ---  | PLQNSL     | -R  | TSWQPSIETN | TNNTTEKSEI |
| Vit-vin_KAN4                 | TPQPSTPQKI | SRLG     | ---  | --- | IR   | SSWSLSM    | --- | ETNDEGRLS  | -HENGLKYSH |
| Pop-tri_KAN4                 | ---        | ---      | ---  | --- | ---  | ---        | --- | ---        | ---        |
| Sol-tub_KAN4                 | KS         | ---      | ---  | --- | ---  | ---        | --- | ---        | ---        |
| Pru-per_KAN4                 | RG         | ---      | ---  | --- | ---  | SWPSSSETN  |     | GSCNLSPGN  | -ALTYSHSPQ |
| Amb-tri_KAN4                 | FSSENVPSHV | VSRG     | ---  | --- | ---  | SWLDSLTK   | --- | NESIYSQAE  | NQYTNLEVEV |
| Fra-vesca_KAN4               | SPSTLLLQNP | SIRG     | ---  | --- | ---  | SWHSTR     | --- | KTNGSCK    | -PSPGDFLTC |
| Mus-acu_KAN4                 | TPTPPTPQSK | SPRK     | ---  | --- | ---  | LNPSGEG    | --- | CAWNIARLLN | NDNKVLL    |
| Glyc_KAN4                    | RT         | ---      | ---  | --- | ---  | PWQSSI     | --- | ETKTDNSRQE | EPEIGLTYSH |
| Glyc_KAN4                    | RA         | ---      | ---  | --- | ---  | SWQSSK     | -E  | TNSINYTON  | -PIINSMYSH |
| Cam-sat_KAN4                 | RA         | ---      | ---  | --- | ---  | SWSSTK     | -G  | VSMSISKHAE | -POLGTT-HH |
| Bra-rapa_KAN4                | RS         | ---      | ---  | --- | ---  | PWSSTK     | --- | ---        | -GV        |
| Bra-nap_KAN4                 | RS         | ---      | ---  | --- | ---  | PWSSTK     | --- | ---        | -GV        |

|                              |            |            |            |            |             |             |             |
|------------------------------|------------|------------|------------|------------|-------------|-------------|-------------|
| Ath_KAN1                     | STS-MISHYQ | RSS---     | IQNQ       | E-ORSNDQAK | RCGNLSC-EN  | PSLEFTLGRP  |             |
| Amb-tric_KAN1                | LLL-QEKDGH | HIE---     | ---        | ---        | KGNNHDL-KN  | PSLEFTLGRP  |             |
| Cam-sat_KAN1                 | STS-MISHHQ | RSS---     | LQNQ       | E-ORSNDQAK | RCGDLS-CNN  | PSLEFTLGRP  |             |
| Bras-ole_KAN1-like           | STS-VISHHQ | RSI---     | LQNQ       | EQQRSSDQTK | RCGDLS-CNN  | PSLEFTLGRP  |             |
| Bra-nap_KAN1-like            | STS-VISHHQ | RSI---     | LQNQ       | EQQRSSDQTK | RCGDLS-CNN  | PSLEFTLGRP  |             |
| Vit-vin_KAN1                 | SFP-SQQRS- | GHQ---     | IEEC       | NST-LLKDYL | GP-NLDC-KN  | PSLEFTLGRP  |             |
| Pru-mum_KAN1-variantX1       | SSQ-LQKIS- | GHQ---     | IQEC       | DSTTQLKSYL | GS-NFET-RN  | PSLEFTLGRP  |             |
| The-cacao_KAN1-variantX1     | SFQSNRTEES | CDS---     | ---        | ---        | -TPLNC-KN   | PSLEFTLGRP  |             |
| Ric-com_KAN1-variantX1       | TVQ-SQQRS- | GHP---     | VQEC       | NSN-PMKGYL | GS-NLDC-KN  | PSLEFTLGRP  |             |
| Pop-eup_KAN1                 | TFQ-SQQRS- | GQL---     | MEES       | DST-RPKSYL | GS-SLAC-KN  | PSLEFTLGRP  |             |
| Pru-per_KAN1-variantX1       | SSQ-LQKIS- | GHQ---     | IQEC       | ESTTQLKSYL | GS-NFET-RN  | PSLEFTLGRP  |             |
| Sol-tub_KAN1-like-variantX2  | SFP-SQQRS- | GHQ---     | IEEC       | NSNRQKSYNI | GS-NLDHKN   | PSLEFTLGRP  |             |
| Nel-nuc_KAN1-variantX1       | TFP-SQQRS- | GHQ---     | IEES       | DLT-RTKSFL | GS-HLEL-KN  | PSLEFTLGRP  |             |
| Vig-rad_KAN1                 | IFQ-SQQISG | GHQ---     | IQDC       | DSSQLKNSLS | GS-GNLEK-KN | PSLEFTLGRP  |             |
| Ath_KAN2                     | PSE-KELDQK | CSS---     | YERI       | SSEEMSSSSI | SGTSPFK-PN  | --LEFTLGRS  |             |
| Amb-tri_KAN2                 | SEVKGGLEDT | SDE---     | LFEI       | SSSDMNQ--- | ---         | KN          | PNLEFTLGRP  |
| Ara-tha_GARP-like_KAN2       | PSE-KELDQK | CSS---     | YERI       | SSEEMSSSSI | SGTSPFK-PN  | --LEFTLGRS  |             |
| Cam-sat_KAN2                 | PS---      | ---        | ---        | ---        | ---         | ---         | EFVL*--     |
| Bra-nap_KAN2                 | PSE-NEIDGK | SSS---     | YERM       | SSEDMSSSNI | SGTSPFK-PN  | --LEFTLG*-- |             |
| Bra-rapa_KAN2                | PSE-NEIDGK | SSS---     | YERM       | SSEDMSSSNI | SGTSPFK-PN  | --LEFTLG*-- |             |
| Cit-sin_KAN2                 | SLE--EVDPK | CMS---     | YEGI       | --SDVSSPNI | SATSPKK-PN  | --LEFTLGRP  |             |
| Vit-vin_KAN2                 | TLE-EDMDPK | CLS---     | YERI       | --SDVSSSNI | SGTSPKK-PN  | --LEFTLGRS  |             |
| The-cacao_KAN2               | SLE-KDMDPK | CLS---     | YERI       | --SDVSSSNI | SGTSPKK-PN  | --LEFTLGRP  |             |
| Med-tru_KAN2                 | SLE-KEMDPK | CLS---     | YERI       | -SDGSSSTNL | SGSSPKK-PN  | LDLEFTLQGP  |             |
| Glycine_KAN2                 | SLE-KEMDPK | CLS---     | YERI       | -SDGSSSNI  | SGSSPKK-PN  | LDLEFSLGQP  |             |
| Vig-rad_KAN2                 | SLE-KEMDPK | CVS---     | YERI       | -SDGSSSNI  | SGSSPKK-AN  | LDLEFSLGQP  |             |
| Vig-ang_KAN2                 | SLE-KEMDPK | CVS---     | YERI       | -SDGSSSNI  | SGSSPKK-AN  | LDLEFSLGQP  |             |
| Vit-vin_KAN2-variantX4       | ERDGVKRWHH | TIM---     | ---        | ---        | ---         | PN          | LHHLFQIS*-- |
| Pop-trichocarpa              | PLE-KGMDPK | CLS---     | YEKI       | --SDVSSSTV | SGTSPKK-PN  | --LEFTLGRP  |             |
| Ath_KAN3                     | SNENEWKRR  | CPS---     | NERL       | SSD---SSSL | TGTRPET-ET  | PNLDFTLATP  |             |
| Bra-napus_KAN3               | ---NKNVDQR | CPS---     | YERL       | SSD---SSSL | TGTRPEI-ET  | PNLEFTLAIP  |             |
| Bra-nap_KAN3                 | ---NKNVDQR | CPS---     | YERL       | SSD---SSSL | TGTRPEI-ET  | PNLEFTLAIP  |             |
| Bra-nap_KAN3                 | ---NKNVDQR | CPS---     | YERL       | SSD---SSSL | TGTRPEI-ET  | PNLEFTLAIP  |             |
| Cam-sat_KAN3                 | ---        | ---        | ---        | ---        | ---         | XN          | YYISLFLSNP  |
| Raph-sat_KAN3                | ---NKNVDQR | CPS---     | YERL       | SSD---SSSL | TGTRPEI-ET  | PNLEFTLAIP  |             |
| Vig-ang_KAN2                 | SLE-KEMDPK | CVS---     | YERI       | -SDGSSSNI  | SGSSPKK-AN  | LDLEFSLGQP  |             |
| Med-tru_KAN2                 | SLE-KEMDPK | CLS---     | YERI       | -SDGSSSTNL | SGSSPKK-PN  | LDLEFTLQGP  |             |
| Vig-rad_KAN2                 | SLE-KEMDPK | CVS---     | YERI       | -SDGSSSNI  | SGSSPKK-AN  | LDLEFSLGQP  |             |
| Glyc_KAN2                    | SLE-KEMDPK | CLS---     | YERI       | -SDGSSSNI  | SGSSPKK-PN  | LDLEFSLGQP  |             |
| Vit-vin_KAN2                 | TLE-EDMDPK | CLS---     | YERI       | --SDVSSSNI | SGTSPKK-PN  | --LEFTLGRS  |             |
| Theo-cac_KAN2                | SLE-KDMDPK | CLS---     | YERI       | --SDVSSSNI | SGTSPKK-PN  | --LEFTLGRP  |             |
| Pop-tri_hypothetical.protein | PLEKKGMDPK | CLS---     | YEKI       | --SDVSSSTV | SGTSPKK-PN  | --LEFTLGRP  |             |
| Ric-com_KAN2                 | SLE---     | ---        | ---        | ---        | ---         | ---         | VP          |
| Ath_KAN4                     | TKDNEEKEDT | N---       | ---        | ---        | ---         | IH          | LNLDFTLGRP  |
| Ric-com_KAN4                 | PSAHDTKENG | PMADLHMSDR | VKESLDSSSL | SSSD---    | ML          | VNLEFTLGRP  |             |
| Pop-tri_KAN4                 | ---NISSLE  | ALTYVNVEAH | DHSKRLDSSS | SSSD---    | ML          | LNLEFTLGRP  |             |
| Nel-nuc_KAN4                 | LKSTDLTNEK | NKMDGADFYV | SHNESERLYL | SPLASSH-   | VF          | PNLEFTLGRQ  |             |
| The-cac_KAN4                 | NHVKVDGDKA | VLH---     | VSDR       | MKERLDSSSL | SPSD---     | ML          | LNLEFTLGRP  |
| Vit-vin_KAN4                 | LMANDTKMEG | HKV---     | ALHV       | AEGPKERVDS | SALSPSD-    | ML          | LNLEFTLGRP  |
| Glycine_KAN4                 | LKGNNNNET  | MVD---     | GHN        | NSGGLDSSPL | SRSE-       | AM          | LDLEFTLGRP  |
| Sol-lyc_KAN4                 | ---        | ---        | YPHI       | YTNMDGIETA | NNSSND-     | TM          | LDLEFTLGRP  |
| Med-tru_KAN4                 | GLTYSQLKEN | DTM---     | VKRL       | DSA---     | QL          | IDLEFTLGRP  |             |
| Vit-vin_KAN4                 | LMANDTKMEG | HKVALHVAEG | PKERVDSSAL | SPSD---    | ML          | LNLEFTLGRP  |             |
| Pop-tri_KAN4                 | ---        | ---        | ---        | ---        | ---         | ---         | LEVDA--     |
| Sol-tub_KAN4                 | ---        | ---        | FEEI       | ---        | ---         | DA          | LSQPSTISQN  |
| Pru-per_KAN4                 | SNGTKVEEEE | SGRHVCDDGV | GMKERGTTLA | CGLSASDMY  | ---         | ---         | LNLEFTLGRP  |
| Amb-tri_KAN4                 | DKYKEASDSY | HEE---     | AEKW       | HSSSYPPSQ  | TSSRLLS-    | KL          | PNLEFTLGRE  |
| Fra-vesca_KAN4               | SDSPSSIGTK | VDE---     | EDSG       | SGRQLDCSSL | SSSDH---    | MY          | LNLEFTLGRP  |
| Mus-acu_KAN4                 | ---        | ---        | MEDQ       | PQELRPTLVP | PSMPP---    | RM          | PNLEITLGRQ  |
| Glyc_KAN4                    | LKGNNNNET  | TVD---     | GHN        | NYGGLDSTPL | SRSEE---    | AM          | LDLEFTLGRP  |
| Glyc_KAN4                    | LKG-NQTMVG | GQHYGGLSNC | MKEKLDSCSL | SRSD---    | MT          | LDLEFTLGRP  |             |
| Cam-sat_KAN4                 | TKENKEKAT  | N---       | ---        | ---        | ---         | VY          | LNLEFTLGRP  |
| Bra-rapa_KAN4                | SMSISQADPH | ME---      | INRI       | TKDDVEK--- | ---         | DH          | LSLEFTLGRP  |
| Bra-nap_KAN4                 | SMSISQADPH | ME---      | INRI       | TKDDVEK--- | ---         | DH          | LSLEFTLGRP  |

|                              |             |            |            |            |            |
|------------------------------|-------------|------------|------------|------------|------------|
| Ath_KAN1                     | --DWHEK*--  | ----       | ----       | ----       | ----       |
| Amb-tric_KAN1                | --GWHGKDRD* | ----       | ----       | ----       | ----       |
| Cam-sat_KAN1                 | --DWHDK*--  | ----       | ----       | ----       | ----       |
| Bras-ole_KAN1-like           | --DWHEK*--  | ----       | ----       | ----       | ----       |
| Bra-nap_KAN1-like            | --DWHEK*--  | ----       | ----       | ----       | ----       |
| Vit-vin_KAN1                 | --DWHGKEHD* | ----       | ----       | ----       | ----       |
| Pru-mum_KAN1-variantX1       | --DWNKGPHD* | ----       | ----       | ----       | ----       |
| The-cacao_KAN1-variantX1     | --DWHGTQHK* | HT*        | ----       | ----       | ----       |
| Ric-com_KAN1-variantX1       | --DWQGNH*   | ----       | ----       | ----       | ----       |
| Pop-eup_KAN1                 | --DWPGEHC*  | ----       | ----       | ----       | ----       |
| Pru-per_KAN1-variantX1       | --DWNKGPHD* | ----       | ----       | ----       | ----       |
| Sol-tub_KAN1-like-variantX2  | --DWIEKDHE* | ----       | ----       | ----       | ----       |
| Nel-nuc_KAN1-variantX1       | --DWCQEH*   | ----       | ----       | ----       | ----       |
| Vig-rad_KAN1                 | --DWNKGQA*  | ----       | ----       | ----       | ----       |
| Ath_KAN2                     | --H*        | ----       | ----       | ----       | ----       |
| Amb-tri_KAN2                 | --D*        | ----       | ----       | ----       | ----       |
| Ara-tha_GARP-like_KAN2       | --H*        | ----       | ----       | ----       | ----       |
| Cam-sat_KAN2                 | ----        | ----       | ----       | ----       | ----       |
| Bra-nap_KAN2                 | ----        | ----       | ----       | ----       | ----       |
| Bra-rapa_KAN2                | ----        | ----       | ----       | ----       | ----       |
| Cit-sin_KAN2                 | --H*        | ----       | ----       | ----       | ----       |
| Vit-vin_KAN2                 | --H*        | ----       | ----       | ----       | ----       |
| The-cacao_KAN2               | --H*        | ----       | ----       | ----       | ----       |
| Med-tru_KAN2                 | --L*        | ----       | ----       | ----       | ----       |
| Glycine_KAN2                 | --L*        | ----       | ----       | ----       | ----       |
| Vig-rad_KAN2                 | --L*        | ----       | ----       | ----       | ----       |
| Vig-ang_KAN2                 | --L*        | ----       | ----       | ----       | ----       |
| Vit-vin_KAN2-variantX4       | ----        | ----       | ----       | ----       | ----       |
| Pop-trichocarpa              | --H*        | ----       | ----       | ----       | ----       |
| Ath_KAN3                     | --NLSP*     | ----       | ----       | ----       | ----       |
| Bra-napus_KAN3               | --NLPP*     | ----       | ----       | ----       | ----       |
| Bra-nap_KAN3                 | --NLPP*FTI  | YTIKTKKNC* | NIQI*TLKLC | LRYEKNMK*C | LLLRLDICSF |
| Bra-nap_KAN3                 | --NLPP*FTI  | YTIKTKKNC* | NIQI*TLKLC | LRYEKNMK*C | LLLRLDICSF |
| Cam-sat_KAN3                 | --KIST*     | ----       | ----       | ----       | ----       |
| Raph-sat_KAN3                | --NLPP*     | ----       | ----       | ----       | ----       |
| Vig-ang_KAN2                 | --L*QGS DPS | EYVLLIN*E  | TERGRELERE | RGSR*ENERK | RKLKENKREK |
| Med-tru_KAN2                 | --L*        | ----       | ----       | ----       | ----       |
| Vig-rad_KAN2                 | --L*        | ----       | ----       | ----       | ----       |
| Glyc_KAN2                    | --L*        | ----       | ----       | ----       | ----       |
| Vit-vin_KAN2                 | --H*        | ----       | ----       | ----       | ----       |
| Theo-cac_KAN2                | --H*        | ----       | ----       | ----       | ----       |
| Pop-tri_hypothetical.protein | --H*SYPLCT  | THFESLLSLR | GCW*RESGTQ | VRKSELKSKK | RKGRKKEKRR |
| Ric-com_KAN2                 | --*         | ----       | ----       | ----       | ----       |
| Ath_KAN4                     | --SWGMEYAE  | PSSDLTLLKC | *--        | ----       | ----       |
| Ric-com_KAN4                 | --SWQMDYAE  | SSNELTLLKC | *--        | ----       | ----       |
| Pop-tri_KAN4                 | --SWQLDYAE  | TTNELTLLKC | *--        | ----       | ----       |
| Nel-nuc_KAN4                 | --SWEMDYAD  | PTNELTLLKC | *--        | ----       | ----       |
| The-cac_KAN4                 | --SWQMDYAE  | SSNELTLLKC | *--        | ----       | ----       |
| Vit-vin_KAN4                 | --SWQIDYAD  | QSPNELALLK | C*VL*IS*IM | CFQREKISSM | HEICSRNFVL |
| Glycine_KAN4                 | --NWQKDHP   | SSRELTLLKC | *--        | ----       | ----       |
| Sol-lyc_KAN4                 | --SWKMGQAG  | SSSNDLTLLK | C*         | ----       | ----       |
| Med-tru_KAN4                 | --NWGKDHA   | SSRELSLLKC | *--        | ----       | ----       |
| Vit-vin_KAN4                 | --SWQIDYAD  | QSPNELALLK | C*         | ----       | ----       |
| Pop-tri_KAN4                 | ----        | ----       | ----       | ----       | ----       |
| Sol-tub_KAN4                 | --MSHLR*    | ----       | ----       | ----       | ----       |
| Pru-per_KAN4                 | TAEWTVLNSL  | NLQMT*     | ----       | ----       | ----       |
| Amb-tri_KAN4                 | --SWQNDYSE  | TTSELALLKC | *--        | ----       | ----       |
| Fra-vesca_KAN4               | SGEWSMLNTL  | NLQMT*     | ----       | ----       | ----       |
| Mus-acu_KAN4                 | --SWQMDYAE  | TSNEMTLLRC | L*         | ----       | ----       |
| Glyc_KAN4                    | --NWQKDHP   | SSRELTLLKC | *--        | ----       | ----       |
| Glyc_KAN4                    | --TSCKQTTR  | X          | ----       | ----       | ----       |
| Cam-sat_KAN4                 | --SWGMDYAE  | PSSDLTLLKC | *LFNVKKNYK | *VSLDCQF*H | NLTC*IIWTL |
| Bra-rapa_KAN4                | --SWGIDHV*  | ----       | ----       | ----       | ----       |
| Bra-nap_KAN4                 | --SWGIDHV*  | ----       | ----       | ----       | ----       |

|                              |             |            |            |            |            |
|------------------------------|-------------|------------|------------|------------|------------|
| Ath_KAN1                     | -----       | -----      | -----      | -----      | -----      |
| Amb-tric_KAN1                | -----       | -----      | -----      | -----      | -----      |
| Cam-sat_KAN1                 | -----       | -----      | -----      | -----      | -----      |
| Bras-ole_KAN1-like           | -----       | -----      | -----      | -----      | -----      |
| Bra-nap_KAN1-like            | -----       | -----      | -----      | -----      | -----      |
| Vit-vin_KAN1                 | -----       | -----      | -----      | -----      | -----      |
| Pru-mum_KAN1-variantX1       | -----       | -----      | -----      | -----      | -----      |
| The-cacao_KAN1-variantX1     | -----       | -----      | -----      | -----      | -----      |
| Ric-com_KAN1-variantX1       | -----       | -----      | -----      | -----      | -----      |
| Pop-eup_KAN1                 | -----       | -----      | -----      | -----      | -----      |
| Pru-per_KAN1-variantX1       | -----       | -----      | -----      | -----      | -----      |
| Sol-tub_KAN1-like-variantX2  | -----       | -----      | -----      | -----      | -----      |
| Nel-nuc_KAN1-variantX1       | -----       | -----      | -----      | -----      | -----      |
| Vig-rad_KAN1                 | -----       | -----      | -----      | -----      | -----      |
| Ath_KAN2                     | -----       | -----      | -----      | -----      | -----      |
| Amb-tri_KAN2                 | -----       | -----      | -----      | -----      | -----      |
| Ara-tha_GARP-like_KAN2       | -----       | -----      | -----      | -----      | -----      |
| Cam-sat_KAN2                 | -----       | -----      | -----      | -----      | -----      |
| Bra-nap_KAN2                 | -----       | -----      | -----      | -----      | -----      |
| Bra-rapa_KAN2                | -----       | -----      | -----      | -----      | -----      |
| Cit-sin_KAN2                 | -----       | -----      | -----      | -----      | -----      |
| Vit-vin_KAN2                 | -----       | -----      | -----      | -----      | -----      |
| The-cacao_KAN2               | -----       | -----      | -----      | -----      | -----      |
| Med-tru_KAN2                 | -----       | -----      | -----      | -----      | -----      |
| Glycine_KAN2                 | -----       | -----      | -----      | -----      | -----      |
| Vig-rad_KAN2                 | -----       | -----      | -----      | -----      | -----      |
| Vig-ang_KAN2                 | -----       | -----      | -----      | -----      | -----      |
| Vit-vin_KAN2-variantX4       | -----       | -----      | -----      | -----      | -----      |
| Pop-trichocarpa              | -----       | -----      | -----      | -----      | -----      |
| Ath_KAN3                     | -----       | -----      | -----      | -----      | -----      |
| Bra-napus_KAN3               | -----       | -----      | -----      | -----      | -----      |
| Bra-nap_KAN3                 | FPVNLRSLEFX | -----      | -----      | -----      | -----      |
| Bra-nap_KAN3                 | FPVNLRSLEFX | -----      | -----      | -----      | -----      |
| Cam-sat_KAN3                 | -----       | -----      | -----      | -----      | -----      |
| Raph-sat_KAN3                | -----       | -----      | -----      | -----      | -----      |
| Vig-ang_KAN2                 | KKKSKRS*RT  | QGDKKDRKQQ | KKGLREKSMA | FLSELL*DPN | QHIIFSW*IY |
| Med-tru_KAN2                 | -----       | -----      | -----      | -----      | -----      |
| Vig-rad_KAN2                 | -----       | -----      | -----      | -----      | -----      |
| Glyc_KAN2                    | -----       | -----      | -----      | -----      | -----      |
| Vit-vin_KAN2                 | -----       | -----      | -----      | -----      | -----      |
| Theo-cac_KAN2                | -----       | -----      | -----      | -----      | -----      |
| Pop-tri_hypothetical.protein | RAKE*QRDSK  | DRKQKVKSG  | KGMSFISSE  | IQINILYSYV | NMKS*FCML  |
| Ric-com_KAN2                 | -----       | -----      | -----      | -----      | -----      |
| Ath_KAN4                     | -----       | -----      | -----      | -----      | -----      |
| Ric-com_KAN4                 | -----       | -----      | -----      | -----      | -----      |
| Pop-tri_KAN4                 | -----       | -----      | -----      | -----      | -----      |
| Nel-nuc_KAN4                 | -----       | -----      | -----      | -----      | -----      |
| The-cac_KAN4                 | -----       | -----      | -----      | -----      | -----      |
| Vit-vin_KAN4                 | SK*KKGKKRR  | EFINGHNPLI | *IX-       | -----      | -----      |
| Glycine_KAN4                 | -----       | -----      | -----      | -----      | -----      |
| Sol-lyc_KAN4                 | -----       | -----      | -----      | -----      | -----      |
| Med-tru_KAN4                 | -----       | -----      | -----      | -----      | -----      |
| Vit-vin_KAN4                 | -----       | -----      | -----      | -----      | -----      |
| Pop-tri_KAN4                 | -----       | -----      | -----      | -----      | -----      |
| Sol-tub_KAN4                 | -----       | -----      | -----      | -----      | -----      |
| Pru-per_KAN4                 | -----       | -----      | -----      | -----      | -----      |
| Amb-tri_KAN4                 | -----       | -----      | -----      | -----      | -----      |
| Fra-vesca_KAN4               | -----       | -----      | -----      | -----      | -----      |
| Mus-acu_KAN4                 | -----       | -----      | -----      | -----      | -----      |
| Glyc_KAN4                    | -----       | -----      | -----      | -----      | -----      |
| Glyc-KAN4                    | -----       | -----      | -----      | -----      | -----      |
| Cam-sat_KAN4                 | EESSLSSHMLI | FQL*CSMIVF | GCINKRIGLS | SX-        | -----      |
| Bra-rapa_KAN4                | -----       | -----      | -----      | -----      | -----      |
| Bra-nap_KAN4                 | -----       | -----      | -----      | -----      | -----      |

|                              |                         |            |                        |                        |                        |
|------------------------------|-------------------------|------------|------------------------|------------------------|------------------------|
| Ath_KAN1                     | -----                   | -----      | -----                  | -----                  | -----                  |
| Amb-tric_KAN1                | -----                   | -----      | -----                  | -----                  | -----                  |
| Cam-sat_KAN1                 | -----                   | -----      | -----                  | -----                  | -----                  |
| Bras-ole_KAN1-like           | -----                   | -----      | -----                  | -----                  | -----                  |
| Bra-nap_KAN1-like            | -----                   | -----      | -----                  | -----                  | -----                  |
| Vit-vin_KAN1                 | -----                   | -----      | -----                  | -----                  | -----                  |
| Pru-mum_KAN1-variantX1       | -----                   | -----      | -----                  | -----                  | -----                  |
| The-cacao_KAN1-variantX1     | -----                   | -----      | -----                  | -----                  | -----                  |
| Ric-com_KAN1-variantX1       | -----                   | -----      | -----                  | -----                  | -----                  |
| Pop-eup_KAN1                 | -----                   | -----      | -----                  | -----                  | -----                  |
| Pru-per_KAN1-variantX1       | -----                   | -----      | -----                  | -----                  | -----                  |
| Sol-tub_KAN1-like-variantX2  | -----                   | -----      | -----                  | -----                  | -----                  |
| Nel-nuc_KAN1-variantX1       | -----                   | -----      | -----                  | -----                  | -----                  |
| Vig-rad_KAN1                 | -----                   | -----      | -----                  | -----                  | -----                  |
| Ath_KAN2                     | -----                   | -----      | -----                  | -----                  | -----                  |
| Amb-tri_KAN2                 | -----                   | -----      | -----                  | -----                  | -----                  |
| Ara-tha_GARP-like_KAN2       | -----                   | -----      | -----                  | -----                  | -----                  |
| Cam-sat_KAN2                 | -----                   | -----      | -----                  | -----                  | -----                  |
| Bra-nap_KAN2                 | -----                   | -----      | -----                  | -----                  | -----                  |
| Bra-rapa_KAN2                | -----                   | -----      | -----                  | -----                  | -----                  |
| Cit-sin_KAN2                 | -----                   | -----      | -----                  | -----                  | -----                  |
| Vit-vin_KAN2                 | -----                   | -----      | -----                  | -----                  | -----                  |
| The-cacao_KAN2               | -----                   | -----      | -----                  | -----                  | -----                  |
| Med-tru_KAN2                 | -----                   | -----      | -----                  | -----                  | -----                  |
| Glycine_KAN2                 | -----                   | -----      | -----                  | -----                  | -----                  |
| Vig-rad_KAN2                 | -----                   | -----      | -----                  | -----                  | -----                  |
| Vig-ang_KAN2                 | -----                   | -----      | -----                  | -----                  | -----                  |
| Vit-vin_KAN2-variantX4       | -----                   | -----      | -----                  | -----                  | -----                  |
| Pop-trichocarpa              | -----                   | -----      | -----                  | -----                  | -----                  |
| Ath_KAN3                     | -----                   | -----      | -----                  | -----                  | -----                  |
| Bra-napus_KAN3               | -----                   | -----      | -----                  | -----                  | -----                  |
| Bra-nap_KAN3                 | -----                   | -----      | -----                  | -----                  | -----                  |
| Bra-nap_KAN3                 | -----                   | -----      | -----                  | -----                  | -----                  |
| Cam-sat_KAN3                 | -----                   | -----      | -----                  | -----                  | -----                  |
| Raph-sat_KAN3                | -----                   | -----      | -----                  | -----                  | -----                  |
| Vig-ang_KAN2                 | EL*LI <sup>CM</sup> FLQ | SERKKET*ES | ERE*ESERER             | ERERELS* <sup>RY</sup> | EVILGNCNGA             |
| Med-tru_KAN2                 | -----                   | -----      | -----                  | -----                  | -----                  |
| Vig-rad_KAN2                 | -----                   | -----      | -----                  | -----                  | -----                  |
| Glyc_KAN2                    | -----                   | -----      | -----                  | -----                  | -----                  |
| Vit-vin_KAN2                 | -----                   | -----      | -----                  | -----                  | -----                  |
| Theo-cac_KAN2                | -----                   | -----      | -----                  | -----                  | -----                  |
| Pop-tri_hypothetical.protein | LHSRRKRERE              | RERERPLERD | GEREL* <sup>PSQS</sup> | IKRSLVIVTE             | QFTLI* <sup>NIFI</sup> |
| Ric-com_KAN2                 | -----                   | -----      | -----                  | -----                  | -----                  |
| Ath_KAN4                     | -----                   | -----      | -----                  | -----                  | -----                  |
| Ric-com_KAN4                 | -----                   | -----      | -----                  | -----                  | -----                  |
| Pop-tri_KAN4                 | -----                   | -----      | -----                  | -----                  | -----                  |
| Nel-nuc_KAN4                 | -----                   | -----      | -----                  | -----                  | -----                  |
| The-cac_KAN4                 | -----                   | -----      | -----                  | -----                  | -----                  |
| Vit-vin_KAN4                 | -----                   | -----      | -----                  | -----                  | -----                  |
| Glycine_KAN4                 | -----                   | -----      | -----                  | -----                  | -----                  |
| Sol-lyc_KAN4                 | -----                   | -----      | -----                  | -----                  | -----                  |
| Med-tru_KAN4                 | -----                   | -----      | -----                  | -----                  | -----                  |
| Vit-vin_KAN4                 | -----                   | -----      | -----                  | -----                  | -----                  |
| Pop-tri_KAN4                 | -----                   | -----      | -----                  | -----                  | -----                  |
| Sol-tub_KAN4                 | -----                   | -----      | -----                  | -----                  | -----                  |
| Pru-per_KAN4                 | -----                   | -----      | -----                  | -----                  | -----                  |
| Amb-tri_KAN4                 | -----                   | -----      | -----                  | -----                  | -----                  |
| Fra-vesca_KAN4               | -----                   | -----      | -----                  | -----                  | -----                  |
| Mus-acu_KAN4                 | -----                   | -----      | -----                  | -----                  | -----                  |
| Glyc_KAN4                    | -----                   | -----      | -----                  | -----                  | -----                  |
| Glyc-KAN4                    | -----                   | -----      | -----                  | -----                  | -----                  |
| Cam-sat_KAN4                 | -----                   | -----      | -----                  | -----                  | -----                  |
| Bra-rapa_KAN4                | -----                   | -----      | -----                  | -----                  | -----                  |
| Bra-nap_KAN4                 | -----                   | -----      | -----                  | -----                  | -----                  |



|                              |            |            |            |            |            |
|------------------------------|------------|------------|------------|------------|------------|
| Ath_KAN1                     | -----      | -----      | -----      | -----      | -----      |
| Amb-tric_KAN1                | -----      | -----      | -----      | -----      | -----      |
| Cam-sat_KAN1                 | -----      | -----      | -----      | -----      | -----      |
| Bras-ole_KAN1-like           | -----      | -----      | -----      | -----      | -----      |
| Bra-nap_KAN1-like            | -----      | -----      | -----      | -----      | -----      |
| Vit-vin_KAN1                 | -----      | -----      | -----      | -----      | -----      |
| Pru-mum_KAN1-variantX1       | -----      | -----      | -----      | -----      | -----      |
| The-cacao_KAN1-variantX1     | -----      | -----      | -----      | -----      | -----      |
| Ric-com_KAN1-variantX1       | -----      | -----      | -----      | -----      | -----      |
| Pop-eup_KAN1                 | -----      | -----      | -----      | -----      | -----      |
| Pru-per_KAN1-variantX1       | -----      | -----      | -----      | -----      | -----      |
| Sol-tub_KAN1-like-variantX2  | -----      | -----      | -----      | -----      | -----      |
| Nel-nuc_KAN1-variantX1       | -----      | -----      | -----      | -----      | -----      |
| Vig-rad_KAN1                 | -----      | -----      | -----      | -----      | -----      |
| Ath_KAN2                     | -----      | -----      | -----      | -----      | -----      |
| Amb-tri_KAN2                 | -----      | -----      | -----      | -----      | -----      |
| Ara-tha_GARP-like_KAN2       | -----      | -----      | -----      | -----      | -----      |
| Cam-sat_KAN2                 | -----      | -----      | -----      | -----      | -----      |
| Bra-nap_KAN2                 | -----      | -----      | -----      | -----      | -----      |
| Bra-rapa_KAN2                | -----      | -----      | -----      | -----      | -----      |
| Cit-sin_KAN2                 | -----      | -----      | -----      | -----      | -----      |
| Vit-vin_KAN2                 | -----      | -----      | -----      | -----      | -----      |
| The-cacao_KAN2               | -----      | -----      | -----      | -----      | -----      |
| Med-tru_KAN2                 | -----      | -----      | -----      | -----      | -----      |
| Glycine_KAN2                 | -----      | -----      | -----      | -----      | -----      |
| Vig-rad_KAN2                 | -----      | -----      | -----      | -----      | -----      |
| Vig-ang_KAN2                 | -----      | -----      | -----      | -----      | -----      |
| Vit-vin_KAN2-variantX4       | -----      | -----      | -----      | -----      | -----      |
| Pop-trichocarpa              | -----      | -----      | -----      | -----      | -----      |
| Ath_KAN3                     | -----      | -----      | -----      | -----      | -----      |
| Bra-napus_KAN3               | -----      | -----      | -----      | -----      | -----      |
| Bra-nap_KAN3                 | -----      | -----      | -----      | -----      | -----      |
| Bra-nap_KAN3                 | -----      | -----      | -----      | -----      | -----      |
| Cam-sat_KAN3                 | -----      | -----      | -----      | -----      | -----      |
| Raph-sat_KAN3                | -----      | -----      | -----      | -----      | -----      |
| Vig-ang_KAN2                 | LYIYEIFRYF | HQRSWVPNPI | FNSTPRHMLY | TLGTKERIEE | MDLGKD*KI* |
| Med-tru_KAN2                 | -----      | -----      | -----      | -----      | -----      |
| Vig-rad_KAN2                 | -----      | -----      | -----      | -----      | -----      |
| Glyc_KAN2                    | -----      | -----      | -----      | -----      | -----      |
| Vit-vin_KAN2                 | -----      | -----      | -----      | -----      | -----      |
| Theo-cac_KAN2                | -----      | -----      | -----      | -----      | -----      |
| Pop-tri_hypothetical.protein | FLX        | -----      | -----      | -----      | -----      |
| Ric-com_KAN2                 | -----      | -----      | -----      | -----      | -----      |
| Ath_KAN4                     | -----      | -----      | -----      | -----      | -----      |
| Ric-com_KAN4                 | -----      | -----      | -----      | -----      | -----      |
| Pop-tri_KAN4                 | -----      | -----      | -----      | -----      | -----      |
| Nel-nuc_KAN4                 | -----      | -----      | -----      | -----      | -----      |
| The-cac_KAN4                 | -----      | -----      | -----      | -----      | -----      |
| Vit-vin_KAN4                 | -----      | -----      | -----      | -----      | -----      |
| Glycine_KAN4                 | -----      | -----      | -----      | -----      | -----      |
| Sol-lyc_KAN4                 | -----      | -----      | -----      | -----      | -----      |
| Med_tru_KAN4                 | -----      | -----      | -----      | -----      | -----      |
| Vit-vin_KAN4                 | -----      | -----      | -----      | -----      | -----      |
| Pop-tri_KAN4                 | -----      | -----      | -----      | -----      | -----      |
| Sol_tub_KAN4                 | -----      | -----      | -----      | -----      | -----      |
| Pru-per_KAN4                 | -----      | -----      | -----      | -----      | -----      |
| Amb-tri_KAN4                 | -----      | -----      | -----      | -----      | -----      |
| Fra-vesca_KAN4               | -----      | -----      | -----      | -----      | -----      |
| Mus-acu_KAN4                 | -----      | -----      | -----      | -----      | -----      |
| Glyc_KAN4                    | -----      | -----      | -----      | -----      | -----      |
| Glyc_KAN4                    | -----      | -----      | -----      | -----      | -----      |
| Cam-sat_KAN4                 | -----      | -----      | -----      | -----      | -----      |
| Bra-rapa_KAN4                | -----      | -----      | -----      | -----      | -----      |
| Bra-nap_KAN4                 | -----      | -----      | -----      | -----      | -----      |

|                              |          |
|------------------------------|----------|
| Ath_KAN1                     | -----    |
| Amb-tric_KAN1                | -----    |
| Cam-sat_KAN1                 | -----    |
| Bras-ole_KAN1-like           | -----    |
| Bra-nap_KAN1-like            | -----    |
| Vit-vin_KAN1                 | -----    |
| Pru-mum_KAN1-variantX1       | -----    |
| The-cacao_KAN1-variantX1     | -----    |
| Ric-com_KAN1-variantX1       | -----    |
| Pop-eup_KAN1                 | -----    |
| Pru-per_KAN1-variantX1       | -----    |
| Sol-tub_KAN1-like-variantX2  | -----    |
| Nel-nuc_KAN1-variantX1       | -----    |
| Vig-rad_KAN1                 | -----    |
| Ath_KAN2                     | -----    |
| Amb-tri_KAN2                 | -----    |
| Ara-tha_GARP-like_KAN2       | -----    |
| Cam-sat_KAN2                 | -----    |
| Bra-nap_KAN2                 | -----    |
| Bra-rapa_KAN2                | -----    |
| Cit-sin_KAN2                 | -----    |
| Vit-vin_KAN2                 | -----    |
| The-cacao_KAN2               | -----    |
| Med-tru_KAN2                 | -----    |
| Glycine_KAN2                 | -----    |
| Vig-rad_KAN2                 | -----    |
| Vig-ang_KAN2                 | -----    |
| Vit-vin_KAN2-variantX4       | -----    |
| Pop-trichocarpa              | -----    |
| Ath_KAN3                     | -----    |
| Bra-napus_KAN3               | -----    |
| Bra-nap_KAN3                 | -----    |
| Bra-nap_KAN3                 | -----    |
| Cam-sat_KAN3                 | -----    |
| Raph-sat_KAN3                | -----    |
| Vig-ang_KAN2                 | IKCOKEYO |
| Med-tru_KAN2                 | -----    |
| Vig-rad_KAN2                 | -----    |
| Glyc_KAN2                    | -----    |
| Vit-vin_KAN2                 | -----    |
| Theo-cac_KAN2                | -----    |
| Pop-tri_hypothetical.protein | -----    |
| Ric-com_KAN2                 | -----    |
| Ath_KAN4                     | -----    |
| Ric-com_KAN4                 | -----    |
| Pop-tri_KAN4                 | -----    |
| Nel-nuc_KAN4                 | -----    |
| The-cac_KAN4                 | -----    |
| Vit-vin_KAN4                 | -----    |
| Glycine_KAN4                 | -----    |
| Sol-lyc_KAN4                 | -----    |
| Med tru_KAN4                 | -----    |
| Vit-vin_KAN4                 | -----    |
| Pop-tri_KAN4                 | -----    |
| Sol_tub_KAN4                 | -----    |
| Pru-per_KAN4                 | -----    |
| Amb-tri_KAN4                 | -----    |
| Fra-vesca_KAN4               | -----    |
| Mus-acu_KAN4                 | -----    |
| Glyc_KAN4                    | -----    |
| Glyc-KAN4                    | -----    |
| Cam-sat_KAN4                 | -----    |
| Bra-rapa_KAN4                | -----    |
| Bra-nap_KAN4                 | -----    |
