# Supplementary material for: Evidence for the Extensive Conservation of Mechanisms of Ovule Integument Development Since the Most Recent Common Ancestor of Living Angiosperms
Source: PubMed Central journal article supplement (PMC6156155; doi:10.3389/fpls.2018.01352), 2018-09-19
Supplement: Image_3.pdf [file Image_3.pdf]

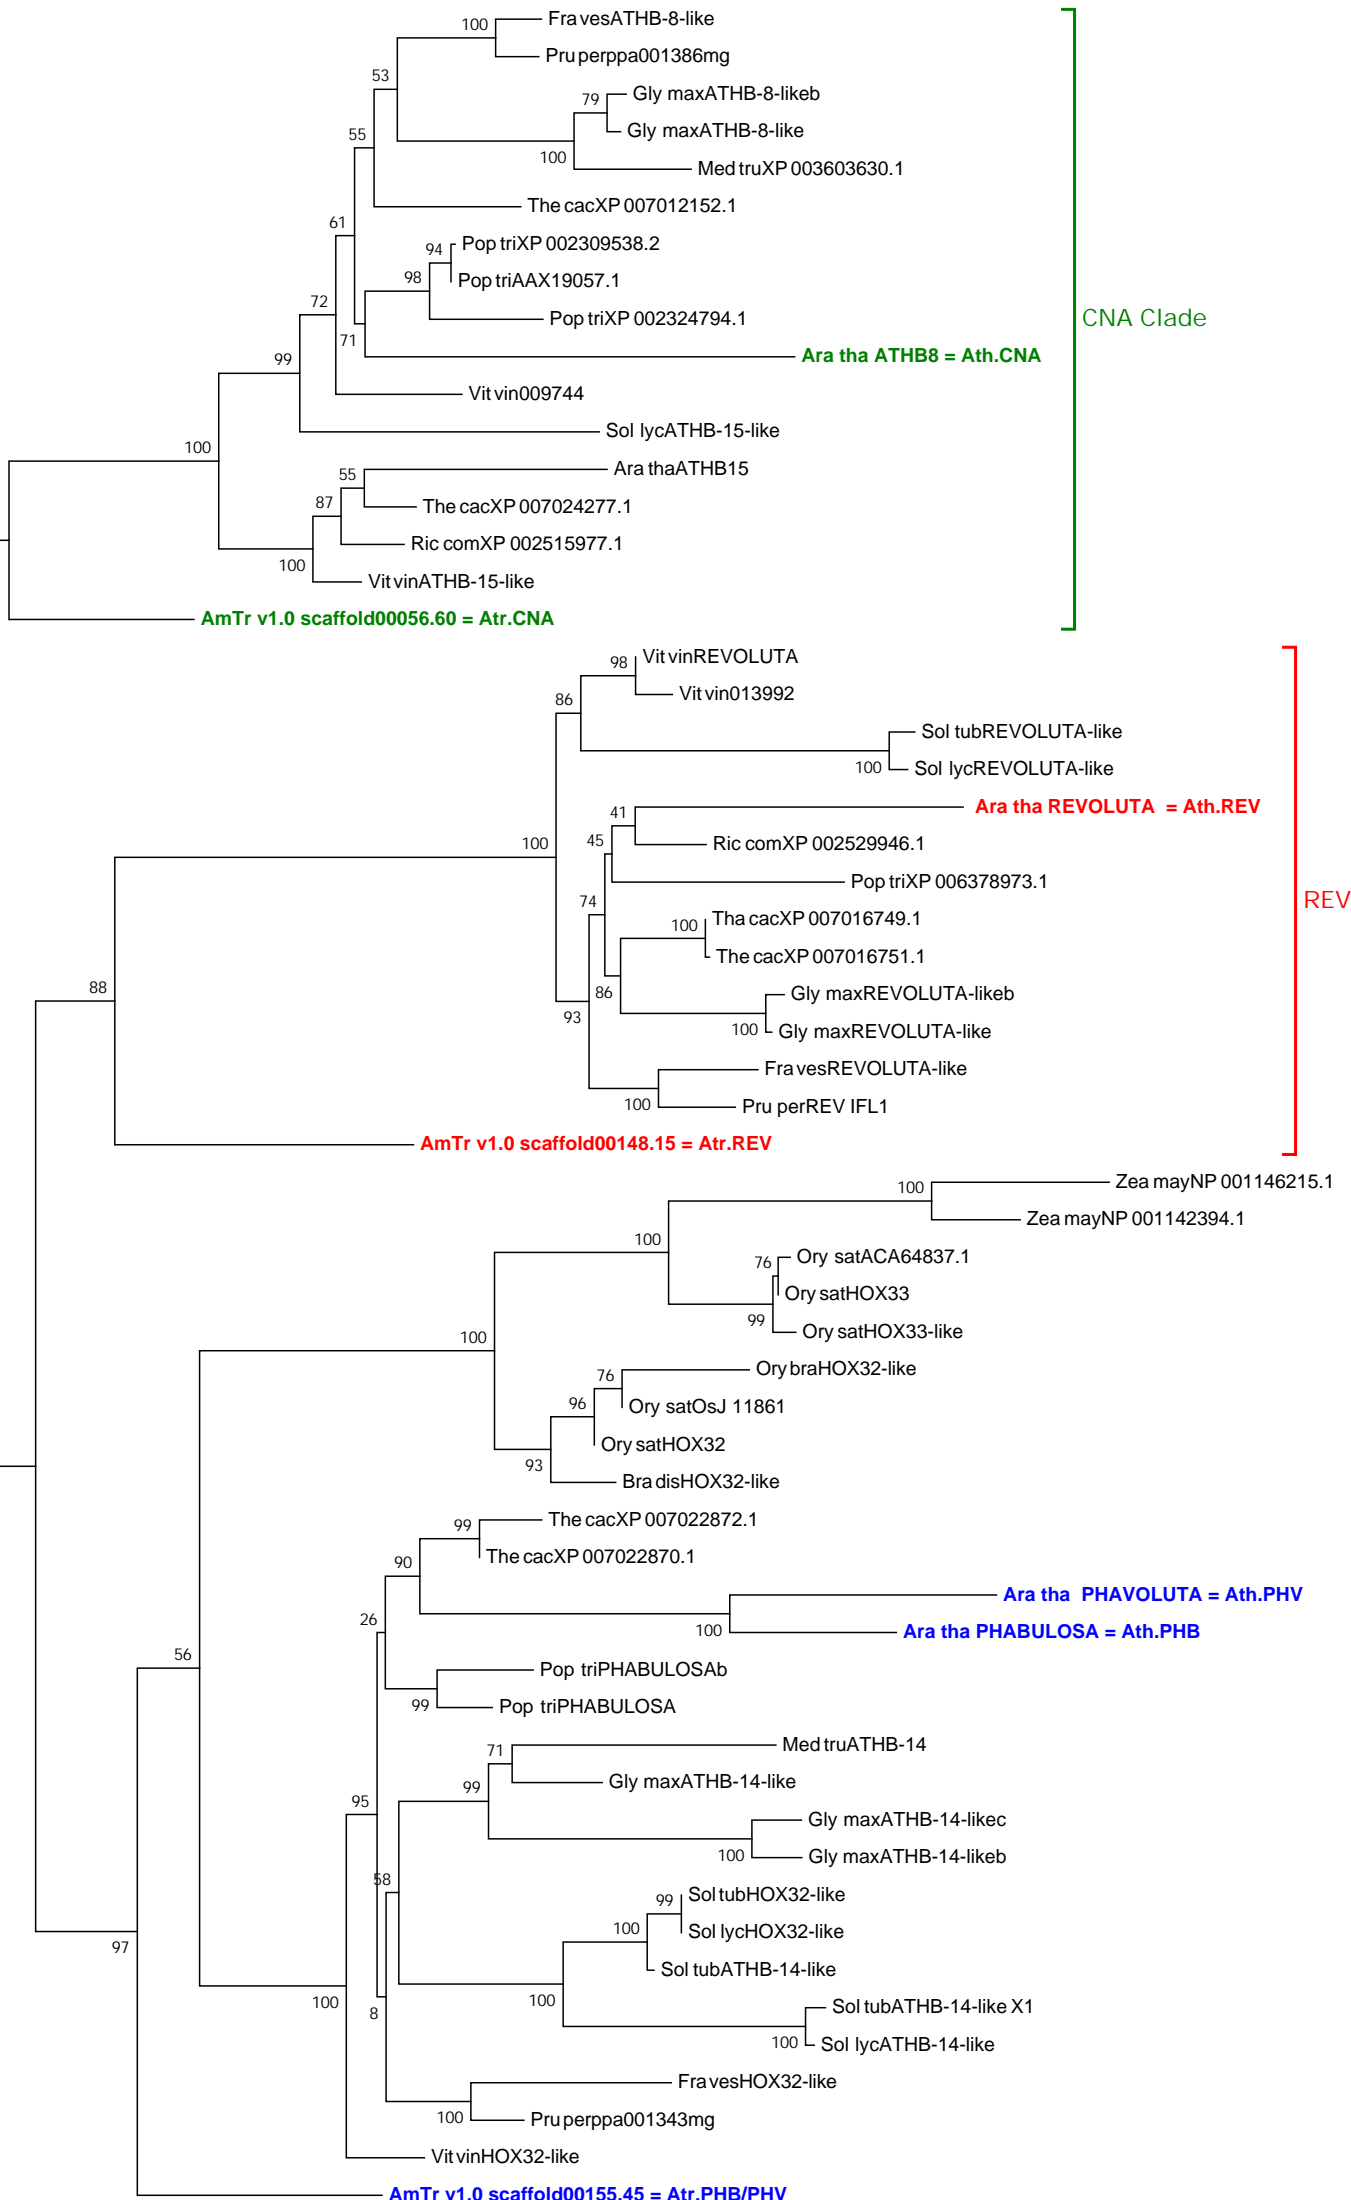

0.05
