# Supplementary material for: Evidence for the Extensive Conservation of Mechanisms of Ovule Integument Development Since the Most Recent Common Ancestor of Living Angiosperms
Source: PubMed Central journal article supplement (PMC6156155; doi:10.3389/fpls.2018.01352), 2018-09-19
Supplement: Image_4.pdf [file Image_4.pdf]

|                            |            |            |            |        |         |            |
|----------------------------|------------|------------|------------|--------|---------|------------|
| AmTr_v1.0_scaffold00148.15 | -----      | -----      | MAV        | AVHK   | -----   | -----      |
| AmTr_v1.0_scaffold00056.60 | -----      | -----      | MAV        | TACK   | -----   | -----      |
| AmTr_v1.0_scaffold00155.45 | -----      | -----      | MAL        | VLQK   | -----   | -----      |
| Ara_thaPHABULOSA           | -----      | -----      | MM         | MVHS   | MS      | RDMMNR     |
| Ara_thaATHB15              | -----      | -----      | MAM        | SCKD   | -----   | -----      |
| Ara-thaPHAVOLUTA           | -----      | -----      | MM         | AHHS   | MDD     | RD         |
| Ara_thaATHB8               | -----      | -----      | MG         | -----  | -----   | G          |
| Ara_thaREVOLUTA            | -----      | -----      | MEM        | AVAN   | H       | RESSSD     |
| Vit_vinHOX32-like          | -----      | -----      | MAL        | SMHK   | -----   | -----      |
| The_cacXP_007022870.1      | -----      | -----      | -----      | -----  | -----   | -----      |
| Ory_satHOX32               | -----      | -----      | MAA        | AMVA   | AVHGVG  | R QDRSSP   |
| Pru_perppa001343mg         | -----      | -----      | MAL        | VMN    | -----   | RD SP      |
| Bra_disHOX32-like          | -----      | -----      | MAG        | AMVAGL | LHG     | RDRDRDRSSP |
| Pop_triPHABULOSA           | -----      | -----      | MAL        | SIHS   | -----   | -----      |
| Pop_triPHABULOSAb          | -----      | -----      | MAL        | SMHS   | -----   | -----      |
| Fra_vesHOX32-like          | -----      | -----      | MAL        | VMHK   | -----   | E          |
| Gly_maxATHB-14-like        | -----      | -----      | MAL        | SMHK   | -----   | -----      |
| Gly_maxREVOLUTA-like       | -----      | -----      | MAM        | VVAQ   | H       | RESSSS     |
| Gly_maxREVOLUTA-likeb      | -----      | -----      | MAM        | AVAQ   | H       | RESSSS     |
| Pru_perREV_IFL1            | -----      | -----      | MAM        | AVAH   | H       | RESSSG     |
| Ory_satHOX33               | -----      | -----      | MAAAAV     | GGRG   | ER      | LSSSSP     |
| Sol_tubATHB-14-like        | -----      | -----      | MAL        | CLQR   | -----   | GGGGE      |
| The_cacXP_007022872.1      | -----      | -----      | MAL        | SMHK   | -----   | D          |
| Ory_satHOX33-like          | -----      | -----      | MAA        | AA     | -----   | -----      |
| Sol_lycREVOLUTA-like       | -----      | -----      | MAM        | VAQQ   | H       | RE SSS     |
| Sol_lycHOX32-like          | -----      | -----      | MAL        | CLQR   | -----   | GEGE       |
| Gly_maxATHB-14-likeb       | -----      | -----      | MAL        | CMQ    | -----   | RD SA      |
| Pop_triXP_006378973.1      | -----      | -----      | MAM        | AVAP   | QH      | RESSSG     |
| Ory_satACA64837.1          | -----      | -----      | MAAAAV     | GGRG   | ER      | LSSSSP     |
| Vit_vin013992              | -----      | -----      | MAM        | AIAQ   | QH      | RESSSS     |
| Ory_satOsJ_11861           | -----      | -----      | -----      | -----  | -----   | -----      |
| Sol_tubREVOLUTA-like       | -----      | -----      | MAM        | VAQQ   | H       | RESSSG     |
| Gly_maxATHB-14-likec       | -----      | -----      | MAL        | CMQS   | QQ      | RD SA      |
| The_cacXP_007024277.1      | -----      | -----      | MAM        | SCKD   | -----   | -----      |
| Vit_vinATHB-15-like        | -----      | -----      | MAM        | SCKD   | -----   | -----      |
| Ric_comXP_002515977.1      | -----      | -----      | MAM        | SCKD   | -----   | -----      |
| The_cacXP_007016751.1      | -----      | -----      | MAM        | AVAQ   | H       | RESSSG     |
| Sol_tubHOX32-like          | -----      | -----      | MAL        | CLQR   | -----   | GEGE       |
| Sol_lycATHB-14-like        | -----      | -----      | -----      | -----  | -----   | -----      |
| Sol_tubATHB-14-like_X1     | -----      | -----      | -----      | -----  | -----   | -----      |
| Med_truATHB-14             | -----      | -----      | MAL        | SMH    | -----   | -----      |
| Zea_mayNP_001142394.1      | -----      | -----      | MAA        | VASR   | -----   | ERLS       |
| Vit_vinREVOLUTA            | -----      | -----      | MAM        | AIAQ   | QH      | RESSSS     |
| Ory_braHOX32-like          | -----      | -----      | MEV        | PAYQ   | -----   | -----      |
| Ric_comXP_002529946.1      | -----      | -----      | MAM        | AMVQ   | H       | RETSSG     |
| Tha_cacXP_007016749.1      | -----      | -----      | MAM        | AVAQ   | H       | RESSSG     |
| Fra_vesREVOLUTA-like       | -----      | -----      | MAM        | AVAH   | HQH     | RESSSG     |
| Zea_mayNP_001146215.1      | -----      | -----      | MAS        | SRG    | -----   | RLRLSP     |
| The_cacXP_007012152.1      | MLIAAEGTGK | TKAKATKNLE | WIFEVSPVIR | SCP    | KVPEENE | VMMAVTSSCK |
| Pru_perppa001386mg         | -----      | -----      | MMA        | VTSA   | -----   | CKD        |
| Pop_triAAX19057.1          | -----      | -----      | -----      | -----  | -----   | -----      |
| Pop_triXP_002309538.2      | -----      | -----      | -----      | -----  | -----   | -----      |
| Fra_vesATHB-8-like         | -----      | -----      | MAV        | TSSS   | SC      | KE LSG     |
| Pop_triXP_002324794.1      | -----      | -----      | -----      | -----  | -----   | -----      |
| Vit_vin009744              | -----      | -----      | -----      | -----  | -----   | -----      |
| Gly_maxATHB-8-like         | -----      | -----      | MMT        | VSSA   | C       | KD         |
| Sol_lycATHB-15-like        | -----      | -----      | MMA        | VTSS   | -----   | -----      |
| Gly_maxATHB-8-likeb        | -----      | -----      | MMA        | VSSA   | C       | KD         |
| Med_truXP_003603630.1      | -----      | -----      | MAV        | SSGC   | -----   | KD         |

|                            |             |            |             |            |            |
|----------------------------|-------------|------------|-------------|------------|------------|
| AmTr_v1.0_scaffold00148.15 | -DSSKHM-DS  | SKYVRYTAEQ | VEALERVYNE  | CPKPSSLRRQ | QLIRECPILC |
| AmTr_v1.0_scaffold00056.60 | -EGKPGM-DP  | GKYVRYTPEQ | VEALERLYHE  | CPKPSSIIRQ | QLIRECPILS |
| AmTr_v1.0_scaffold00155.45 | -DSNKHM-DT  | SKYVRYTPEQ | VEALERVYSE  | CPKPSSLRRQ | QLIRECPILS |
| Ara_thaPHABULOSA           | ESPDKGL-DS  | GKYVRYTPEQ | VEALERVYTE  | CPKPSSLRRQ | QLIRECPILS |
| Ara_thaATHB15              | -GKLGCL-DN  | GKYVRYTPEQ | VEALERLYHD  | CPKPSSIIRQ | QLIRECPILS |
| Ara-thaPHAVOLUTA           | -SPDKGF-DS  | GKYVRYTPEQ | VEALERVYAE  | CPKPSSLRRQ | QLIRECPILC |
| Ara_thaATHB8               | GSNNSHNMDN  | GKYVRYTPEQ | VEALERLYND  | CPKPSSMRRQ | QLIRECPILS |
| Ara_thaREVOLUTA            | -SMNRHLDSS  | GKYVRYTAEQ | VEALERVYAE  | CPKPSSLRRQ | QLIRECSILA |
| Vit_vinHOX32-like          | -ESKQOM-DS  | SKYVRYTPEQ | VEALERVYSE  | CPKPSSMRRQ | QLIRECPILS |
| The_cacXP_007022870.1      | -----M-DS   | SKYVRYTPEQ | VEALERVYSE  | CPKPSSLRRQ | QLIRECPILS |
| Ory_sathOX32               | GGGGAPQVDT  | GKYVRYTPEQ | VEALERVYGE  | CPKPSSLRRQ | QLIRECPILS |
| Pru_perppa001343mg         | GSSSKQOM-DS | SKYVRYTPEQ | VEALERVYSE  | CPKPSSLRRQ | QLIRECPILS |
| Bra_dishOX32-like          | GGGGAPQVDT  | GKYVRYTPEQ | VDALERVYSE  | CPKPSSLRRQ | QLIRECPILS |
| Pop_triPHABULOSA           | --KDKHM-DS  | SKYVRYTPEQ | VEALERVYTE  | CPKPSSLRRQ | QLIRECPILS |
| Pop_triPHABULOSAb          | --KDKQM-DS  | SKYVRYTPEQ | VEALERVYTE  | CPKPSSLRRQ | QLIRECPILC |
| Fra_vesHOX32-like          | KHNNMQM-DS  | SKYVRYTPEQ | VEALERVYSE  | CPKPSSLRRQ | QLIRECPILS |
| Gly_maxATHB-14-like        | DSANNQM-DS  | SKYVRYTPEQ | VEALERVYAE  | CPKPSSLRRQ | QLIRECPILS |
| Gly_maxREVOLUTA-like       | GSIDKHL-DS  | GKYVRYTAEQ | VEALERVYAE  | CPKPSSLRRQ | QLIRECPILS |
| Gly_maxREVOLUTA-likeb      | GSIDKHL-DS  | GKYVRYTAEQ | VEALERVYAE  | CPKPSSLRRQ | QLIRECPILS |
| Pru_perREV_IFL1            | SSINKHL-DA  | GKYVRYTSEQ | VEALERVYAE  | CPKPSSLRRQ | QLIRECPILS |
| Ory_sathOX33               | TAAAPQV-DA  | GKYVRYTPEQ | VEALERVYTE  | CPKPSSLRRQ | QLIRECPILS |
| Sol_tubATHB-14-like        | SGSKNDM-DN  | GKYVRYTPEQ | VEALERVYAE  | CPKPTSLRRQ | QLIRECPILS |
| The_cacXP_007022872.1      | SSNNKQM-DS  | SKYVRYTPEQ | VEALERVYSE  | CPKPSSLRRQ | QLIRECPILS |
| Ory_sathOX33-like          | -----       | -----YTPEQ | VEALERVYTE  | CPKPSSLRRQ | QLIRECPILS |
| Sol_lycREVOLUTA-like       | GSITKHLDS   | GKYVRYTAEQ | VEALERVYAE  | CPKPSSLRRQ | QLIRECHILS |
| Sol_lycHOX32-like          | SGSKNDM-DN  | GKYVRYTPEQ | VEALERVYAE  | CPKPTSLRRQ | QLIRESPILS |
| Gly_maxATHB-14-likeb       | SNKQQLM-DC  | GKYVRYTSEQ | VEALERVYAE  | CPKPSSSRRQ | QLIRECPILS |
| Pop_triXP_006378973.1      | GSINKHLTDN  | GKYVRYTSEQ | VEALERVYAE  | CPKPSSLRRQ | QLIRECPILA |
| Ory_satACA64837.1          | TAAAPQV-DA  | GKYVRYTPEQ | VEALERVYTE  | CPKPSSLRRQ | QLIRECPILS |
| Vit_vin013992              | GSINKHL-DS  | GKYVRYTAEQ | VEALERVYLE  | CPKPSSLRRQ | QLIRECPILS |
| Ory_satOsJ_11861           | -----       | ---MPYHP-- | -----IT     | C-----     | TLIRECPILS |
| Sol_tubREVOLUTA-like       | -SITKHLDS   | GKYVRYTAEQ | VEALERVYAE  | CPKPSSLRRQ | QLIRECHILS |
| Gly_maxATHB-14-likec       | SNK-LLM-DC  | GKYVRYTPEQ | VEALERVYVE  | CPKPSSSRRQ | QLIRECPILA |
| The_cacXP_007024277.1      | -GKLGNL-DN  | GKYVRYTPEQ | VEALERLYHE  | CPKPSSIIRQ | QLIRECPILS |
| Vit_vinATHB-15-like        | ---GGLMDN   | GKYVRYTPEQ | VEALERLYHE  | CPKPSSIIRQ | QLIRECPILS |
| Ric_comXP_002515977.1      | GKQOPANL-DN | GKYVRYTPEQ | VEALERLYHE  | CPKPSSIIRQ | QLIRECPILS |
| The_cacXP_007016751.1      | SSINKHL-DA  | GKYVRYTAEQ | VEALERVYAE  | CPKPSSLRRQ | QLIRECPILS |
| Sol_tubHOX32-like          | SGSKNDM-DN  | GKYVRYTPEQ | VEALERVYAE  | CPKPTSLRRQ | QLIRESPILS |
| Sol_lycATHB-14-like        | -----M-DS   | SKYVRYTPEQ | VEALERVYAE  | CPKPTSLKRH | QLIRECSILS |
| Sol_tubATHB-14-like_X1     | -----M-DS   | SKYVRYTPEQ | VEALERVYAE  | CPKPTSLKRH | QLIRECSILS |
| Med_truATHB-14             | ----KEM-DA  | GKYVRYTPEQ | VEALERVYSE  | CPKPSSLRRQ | QLIRECPILS |
| Zea_mayNP_001142394.1      | PGAAPQV-DA  | GKYVRYTPEQ | VEALERVYSE  | CPKPSSLRRQ | HLIRDCPILR |
| Vit_vinREVOLUTA            | GSINKHL-DS  | GKYVRYTAEQ | VEALERVYLE  | CPKPSSLRRQ | QLIRECPILS |
| Ory_braHOX32-like          | -----       | -----FHAMA | M-----      | -----      | -----CSWDA |
| Ric_comXP_002529946.1      | -SINKHLTDS  | GKYVRYTAEQ | VEALERVYSE  | CPKPSSLRRQ | QLIRECPILS |
| Tha_cacXP_007016749.1      | SSINKHL-DA  | GKYVRYTAEQ | VEALERVYAE  | CPKPSSLRRQ | QLIRECPILS |
| Fra_vesREVOLUTA-like       | SSINKHLNDA  | GKYVRYTSEQ | VEALERVYAE  | CPKPSSLRRQ | QLIRDCPILS |
| Zea_mayNP_001146215.1      | RAAAPQL-DA  | GKYVRYTAEQ | VDALERLAYGE | CPKPSSLRRQ | QLIRDCAVLT |
| The_cacXP_007012152.1      | EGNKIAM-DN  | GKYVRYTPEQ | VDALERLYHE  | CPKPSSMRRQ | QLIRECPILA |
| Pru_perppa001386mg         | GGMKMQM-DN  | GKYVRYTPEQ | VEALERLYHE  | CPKPSSMRRQ | QLIRECPILS |
| Pop_triAAX19057.1          | -----M-DN   | GKYVRYTPEQ | VEALERLYHE  | CPKPSSMRRQ | QLIRECPILS |
| Pop_triXP_002309538.2      | -----M-DN   | GKYVRYTPEQ | VEALERLYHE  | CPKPSSMRRQ | QLIRECPILS |
| Fra_vesATHB-8-like         | GGMKMQM-DN  | GKYVRYTPEQ | VEALERLYHE  | CPKPSSMRRQ | QLIRECPILS |
| Pop_triXP_002324794.1      | -----M-DN   | GKYVRYTPEQ | VEALERLYHE  | CPKPTSTRRQ | QLIRECPILS |
| Vit_vin009744              | ----MAL-DN  | GKYVRYTPEQ | VEALERLYHD  | CPKPSSLRRQ | QLIRECPILS |
| Gly_maxATHB-8-like         | -GSKVAL-DN  | GKYVRYTPEQ | VEALERLYHE  | CPKPSSLRRQ | QLIRECPILS |
| Sol_lycATHB-15-like        | -CKDKFGMDS  | GKYVRYTPEQ | VEALERLYHE  | CPKPSSLRRQ | QLIRECPILS |
| Gly_maxATHB-8-likeb        | -GSKVAL-DN  | GKYVRYTPEQ | VEALERLYHE  | CPKPSSLRRQ | QLIRECPILS |
| Med_truXP_003603630.1      | -GSKIAM-DN  | GKYVRYTPEQ | VEALERLYHE  | CPKPTSLRRQ | QLIRECPILS |

|                            |             |            |            |             |            |
|----------------------------|-------------|------------|------------|-------------|------------|
| AmTr_v1.0_scaffold00148.15 | NI EPKQIKVW | FQNRRCREKQ | RKEASRLQTV | NRKLTAMNKL  | LMEENDRLQK |
| AmTr_v1.0_scaffold00056.60 | NI EPKQIKVW | FQNRRCREKQ | RKEASRLQAV | NRKLTAMNKL  | LMEENDRLQK |
| AmTr_v1.0_scaffold00155.45 | NI EPKQIKVW | FQNRRCREKQ | RKEASRLQTV | NRKLTAMNKL  | LMEENDRLQK |
| Ara_thaPHABULOSA           | NI EPKQIKVW | FQNRRCREKQ | RKEAARLQTV | NRKLTAMNKL  | LMEENDRLQK |
| Ara_thaATHB15              | NI EPKQIKVW | FQNRRCREKQ | RKEASRLQAV | NRKLTAMNKL  | LMEENDRLQK |
| Ara_thaPHAVOLUTA           | NI EPKQIKVW | FQNRRCREKQ | RKEASRLQTV | NRKLTAMNKL  | LMEENDRLQK |
| Ara_thaATHB8               | NI EPKQIKVW | FQNRRCREKQ | RKEASRLQAV | NRKLTAMNKL  | LMEENDRLQK |
| Ara_thaREVOLUTA            | NI EPKQIKVW | FQNRRCREKQ | RKEASRLQSV | NRKLTAMNKL  | LMEENDRLQK |
| Vit_vinHOX32-like          | NI EPKQIKVW | FQNRRCREKQ | RKEASRLQTV | NRKLTAMNKL  | LMEENDRLQK |
| The_cacXP_007022870.1      | NI EPKQIKVW | FQNRRCREKQ | RKEASRLQTV | NRKLTAMNKL  | LMEENDRLQK |
| Ory_satHOX32               | NI EPKQIKVW | FQNRRCREKQ | RKEASRLQTV | NRKLTAMNKL  | LMEENDRLQK |
| Pru_perppa001343mg         | NI EPKQIKVW | FQNRRCREKQ | RKESSRLQTV | NRKLTAMNKL  | LMEENDRLQK |
| Bra_disHOX32-like          | NI EPKQIKVW | FQNRRCREKQ | RKEASRLQTV | NRKLTAMNKL  | LMEENDRLQK |
| Pop_triPHABULOSA           | NI EPKQIKVW | FQNRRCREKQ | RKEASRLQTV | NRKLTAMNKL  | LMEENDRLQK |
| Pop_triPHABULOSAb          | NI EPKQIKVW | FQNRRCREKQ | RKESSRLQTV | NRKLTAMNKL  | LMEENDRLQK |
| Fra_vesHOX32-like          | NI EPKQIKVW | FQNRRCREKQ | RKESSRLTTV | NRKLTAMNKL  | LMEENDRLQK |
| Gly_maxATHB-14-like        | NI EPKQIKVW | FQNRRCREKQ | RKEASRLQTV | NRKLTAMNKL  | LMEENDRLQK |
| Gly_maxREVOLUTA-like       | NI EPKQIKVW | FQNRRCREKQ | RKEASRLQTV | NRKLTAMNKL  | LMEENDRLQK |
| Gly_maxREVOLUTA-likeb      | NI EPKQIKVW | FQNRRCREKQ | RKEASRLQTV | NRKLTAMNKL  | LMEENDRLQK |
| Pru_perREV_IFL1            | NI EPKQIKVW | FQNRRCREKQ | RKESSRLQTV | NRKLTAMNKL  | LMEENDRLQK |
| Ory_satHOX33               | NI EPKQIKVW | FQNRRCREKQ | RKEASRLQTV | NRKLTAMNKL  | LMEENDRLQK |
| Sol_tubATHB-14-like        | NI EPKQIKVW | FQNRRCREKQ | RKEASRLQTV | NRKLTAMNKL  | LMEENDRLQK |
| The_cacXP_007022872.1      | NI EPKQIKVW | FQNRRCREKQ | RKEASRLQTV | NRKLTAMNKL  | LMEENDRLQK |
| Ory_satHOX33-like          | NI EPKQIKVW | FQNRRCREKQ | RKEASRLQTV | NRKLTAMNKL  | LMEENDRLQK |
| Sol_lycREVOLUTA-like       | NI EPKQIKVW | FQNRRCREKQ | RKESSRLQTV | NRKLTAMNKL  | LMEENDRLQK |
| Sol_lycHOX32-like          | NI EPKQIKVW | FQNRRCREKQ | RKEASRLQTV | NRKLTAMNKL  | LMEENDRLQK |
| Gly_maxATHB-14-likeb       | NI EPKQIKVW | FQNRRCREKQ | RKEASRLQTV | NRKLTAMNKL  | LMEENDRLQK |
| Pop_triXP_006378973.1      | NI EPKQIKVW | FQNRRCREKQ | RKESSRLQTV | NRKLTAMNKL  | LMEENDRLQK |
| Ory_satACA64837.1          | NI EPKQIKVW | FQNRRCREKQ | RKEASRLQTV | NRKLTAMNKL  | LMEENDRLQK |
| Vit_vin013992              | NI EPKQIKVW | FQNRRCREKQ | RKEASRLQTV | NRKLTAMNKL  | LMEENDRLQK |
| Ory_satOsJ_11861           | NI EPKQIKVW | FQNRRCREKQ | RKEASRLQTV | NRKLTAMNKL  | LMEENDRLQK |
| Sol_tubREVOLUTA-like       | NI EPKQIKVW | FQNRRCREKQ | RKESSRLQTV | NRKLTAMNKL  | LMEENDRLQK |
| Gly_maxATHB-14-likec       | NI EPKQIKVW | FQNRRCREKQ | RKEASRLQTV | NRKLTAMNKL  | LMEENDRLQK |
| The_cacXP_007024277.1      | NI EPKQIKVW | FQNRRCREKQ | RKEASRLQAV | NRKLTAMNKL  | LMEENDRLQK |
| Vit_vinATHB-15-like        | NI EPKQIKVW | FQNRRCREKQ | RKEASRLQAV | NRKLTAMNKL  | LMEENDRLQK |
| Ric_comXP_002515977.1      | NI EPKQIKVW | FQNRRCREKQ | RKEASRLQAV | NRKLTAMNKL  | LMEENDRLQK |
| The_cacXP_007016751.1      | NI EPKQIKVW | FQNRRCREKQ | RKEASRLQTV | NRKLTAMNKL  | LMEENDRLQK |
| Sol_tubHOX32-like          | NI EPKQIKVW | FQNRRCREKQ | RKEASRLQTV | NRKLTAMNKL  | LMEENDRLQK |
| Sol_lycATHB-14-like        | NI DPQIKVW  | FQNRRCREKQ | RKEASHLQTV | NRKLTAMNKL  | LMEENDRLQK |
| Sol_tubATHB-14-like_X1     | NI DPQIKVW  | FQNRRCREKQ | RKEASHLQTV | NRKLTAMNKL  | LMEENDRLQK |
| Med_truATHB-14             | NI EPKQIKVW | FQNR-----  | -----      | -----SFLHLL | VIV----VTK |
| Zea_mayNP_001142394.1      | NI EPKQIKVW | FQNRRCREKQ | RKESSRLQTV | NRKLTAMNKL  | LMEENDRLQK |
| Vit_vinREVOLUTA            | NI EPKQIKVW | FQNRRCREKQ | RKEASRLQTV | NRKLTAMNKL  | LMEENDRLQK |
| Ory_braHOX32-like          | FYLTRLMLTW  | DAICLCREKQ | RKEASRLQTV | NRKLTAMNKL  | LMEENDRLQK |
| Ric_comXP_002529946.1      | NI EPKQIKVW | FQNRRCREKQ | RKESSRLQTV | NRKLTAMNKL  | LMEENDRLQK |
| Tha_cacXP_007016749.1      | NI EPKQIKVW | FQNRRCREKQ | RKEASRLQTV | NRKLTAMNKL  | LMEENDRLQK |
| Fra_vesREVOLUTA-like       | NI EPKQIKVW | FQNRRCREKQ | RKESSRLQTV | NRKLTAMNKL  | LMEENDRLQK |
| Zea_mayNP_001146215.1      | NVEPRQIKVW  | FQNRRCREKQ | RRESSRLQTV | NRKLTAMNKL  | LMEENDRLQK |
| The_cacXP_007012152.1      | NI EPKQIKVW | FQNRRCREKQ | RKEASRLQAV | NRKLTAMNKL  | LMEENDRLQK |
| Pru_perppa001386mg         | NI EPKQIKVW | FQNRRCREKQ | RKEASRLQTV | NRKLTAMNKL  | LMEENDRLQK |
| Pop_triAAX19057.1          | HI EPKQIKVW | FQNRRCREKQ | RKEASRLQAV | NRKLTAMNKL  | LMEENDRLQK |
| Pop_triXP_002309538.2      | HI EPKQIKVW | FQNRRCREKQ | RKEASRLQAV | NRKLTAMNKL  | LMEENDRLQK |
| Fra_vesATHB-8-like         | NI EPKQIKVW | FQNRRCREKQ | RKEASRLQTV | NRKLTAMNKL  | LMEENDRLQK |
| Pop_triXP_002324794.1      | HI EPKQIKVW | FQNRRCREKQ | RKEASRLQAV | NRKLTAMNKL  | LMEENDRLQK |
| Vit_vin009744              | NI EPKQIKVW | FQNRRCREKQ | RKEASRLQAV | NRKLTAMNKL  | LMEENDRLQK |
| Gly_maxATHB-8-like         | NI EPKQIKVW | FQNRRCREKQ | RKEASRLQAV | NRKLTAMNKL  | LMEENDRLQK |
| Sol_lycATHB-15-like        | NI EPKQIKVW | FQNRRCREKQ | RKESSRLQGV | NRKLTAMNKL  | LMEENDRLQK |
| Gly_maxATHB-8-likeb        | NI EPKQIKVW | FQNRRCREKQ | RKEASRLQAV | NRKLTAMNKL  | LMEENDRLQK |
| Med_truXP_003603630.1      | HI EPKQIKVW | FQNRRCREKQ | RKEAGRLQAV | NRKLTAMNKL  | LMEENDRLQK |

|                            |            |             |    |          |    |             |        |     |      |
|----------------------------|------------|-------------|----|----------|----|-------------|--------|-----|------|
| AmTr_v1.0_scaffold00148.15 | QVAQLVYENG | YMRQOLQN    | -- | VSVATTD  | -- | TSCESVVTSG  | PQQQ   | --  | NPTP |
| AmTr_v1.0_scaffold00056.60 | QVSQLVYENG | YFROQTQN    | -- | VAITTTD  | -- | TSCESVVTSG  | QH     | --- | HLTP |
| AmTr_v1.0_scaffold00155.45 | QVSQLVYENG | YMKQQLQT    | -- | ASVATTD  | -- | TSCESVVTSG  | QHQQ   | --  | NPTP |
| Ara_thaPHABULOSA           | QVSNLVYENG | HMKHQIHT    | -- | ASGTTTD  | -- | NSCESVVMVSG | QHQQQN | --  | PNP  |
| Ara_thaATHB15              | QVSQLVHENS | YFROHTPN    | -- | PSLPAKD  | -- | TSCESVVTSG  | QH     | --- | QLAS |
| Ara-thaPHAVOLUTA           | QVSNLVYENG | FMKHR IHT   | -- | ASGTTTD  | -- | NSCESVVMVSG | QQRQQN | --  | PPTH |
| Ara_thaATHB8               | QVSHLVYENS | YFROHPQN    | -- | QGNLATTD | -- | TSCESVVTSG  | QH     | --- | HLTP |
| Ara_thaREVOLUTA            | QVSQLVCENG | YMKQQLTT    | -- | ---VVND  | -- | PSCESVVT    | ---    | --- | TP   |
| Vit_vinHOX32-like          | QVSQLVYENG | YMRQQLQS    | -- | ASTATTD  | -- | TSCESVVMVSG | QHQQQN | --  | NPTP |
| The_cacXP_007022870.1      | QVSQLVYENG | YMRQQLQT    | -- | GSATTTD  | N  | NSCESVVMVSG | QHQQQN | --  | NPTP |
| Ory_satHOX32               | QVSRLVYENG | YMRQQLHN    | -- | PSVATTD  | -- | TSCESVVTSG  | QHQQQN | --  | PAA  |
| Pru_perppa001343mg         | QVSHLVYENG | FMROQLHS    | -- | ASGTTTD  | -- | NSCESVVMVSG | QHQQQN | --  | NPTP |
| Bra_disHOX32-like          | QVSRLVYENG | YMRTHLSN    | -- | PSVATTD  | -- | TSCESVVTSG  | QHQQQN | --  | PAV  |
| Pop_triPHABULOSA           | QVSHLVYENG | FMROQIQT    | -- | ASATTTD  | -- | NSCESVVMVSG | QHQQQN | --  | NPTP |
| Pop_triPHABULOSAb          | QVSHLVYENG | YMRQIQIT    | -- | ASATATD  | -- | NSCESVVMVSG | QHQQQN | --  | NPTP |
| Fra_vesHOX32-like          | QVSHLVYENG | FMKNKLHS    | -- | ASGTTTD  | -- | TSCESVVMNG  | QHQQQN | --  | NPTP |
| Gly_maxATHB-14-like        | QVSHLVYENG | YMRQQLIHT   | -- | ASAGTTTD | -- | NSCESVVMVSG | QNQQ   | --  | NPTP |
| Gly_maxREVOLUTA-like       | QVSQLVCENG | FMROQLHT    | -- | PSATTTD  | -- | ASCDSVVT    | ---    | --- | TP   |
| Gly_maxREVOLUTA-likeb      | QVSQLVCENG | FMROQLHT    | -- | PSAATTD  | -- | ASCDSVVT    | ---    | --- | TP   |
| Pru_perREV_IFL1            | QVSQLVCENG | FMROQLHT    | -- | APTDD    | -- | ASCDSVVT    | ---    | --- | TP   |
| Ory_satHOX33               | QVSRLVYENG | YMRQQLHN    | -- | PSAATTD  | -- | TSCESVVTSG  | QHQQQN | --  | PAV  |
| Sol_tubATHB-14-like        | QVSQLVYENG | YMKQQLINT   | -- | VSSTTTD  | -- | TSCESVVMVSG | QQRK   | --  | NPTP |
| The_cacXP_007022872.1      | QVSQLVYENG | YMRQQLQT    | -- | GSATTTD  | N  | NSCESVVMVSG | QHQQQN | --  | NPTP |
| Ory_satHOX33-like          | QVSRLVYENG | YMRQQLHN    | -- | PSAATTD  | -- | TSCESVVTSS  | QHQQ   | --  | NPAV |
| Sol_lycREVOLUTA-like       | QVSQLVCENG | YMRQQLQS    | -- | VSAATTD  | -- | VSCESVVT    | ---    | --- | TP   |
| Sol_lycHOX32-like          | QVSQLVYENG | YMKQQLINT   | -- | VSSTTTD  | -- | TSCESVVMVSG | QQRK   | --  | NPTP |
| Gly_maxATHB-14-likeb       | QVSQLVYDNG | FMKQQLIHT   | -- | ASATTTTD | -- | NSCESVVMVSG | QRQH   | --  | NPKI |
| Pop_triXP_006378973.1      | QVSQLVCENG | FMQQLQT     | -- | APAAAD   | -- | ASCDSAVT    | ---    | --- | TP   |
| Ory_satACA64837.1          | QVSRLVYENG | YMRQQLHN    | -- | PSAATTD  | -- | TSCESVVTSG  | QHQQQN | --  | PAV  |
| Vit_vin013992              | QVSQLVYENG | YMRQQLQT    | -- | ASAATTD  | -- | ASCESVVT    | ---    | --- | TP   |
| Ory_satOsJ_11861           | QVSRLVYENG | YMRQQLHN    | -- | PSVATTD  | -- | TSCESVVTSG  | QHQQQN | --  | PAA  |
| Sol_tubREVOLUTA-like       | QVSQLVCENG | YMRQQLQS    | -- | VSAATTD  | -- | VSCESVVT    | ---    | --- | TP   |
| Gly_maxATHB-14-likec       | QVSQLVYDNG | FMKQQLIHTAS | -- | ATTTTTTD | -- | NSCESVVMVSG | QHQP   | --  | NPKI |
| The_cacXP_007024277.1      | QVSQLVYENG | YFROHTQN    | -- | ATLATKD  | -- | PSCESVVTSG  | QH     | --- | HVTP |
| Vit_vinATHB-15-like        | QVSQLVYENG | YFROHTQN    | -- | TTLATKD  | -- | TSCESVVTSG  | QH     | --- | HLTP |
| Ric_comXP_002515977.1      | QVSQLVYENG | YFROHTQN    | -- | TTLATKD  | -- | TSCDSVVTSG  | QH     | --- | HLTP |
| The_cacXP_007016751.1      | QVSQLVCENG | YMRQQLHT    | -- | VNASAATD | -- | ASCDSVVT    | ---    | --- | TP   |
| Sol_tubHOX32-like          | QVSQLVYENG | YMKQQLINT   | -- | VSSTTTD  | -- | TSCESVVMVSG | QQRK   | --  | NPTP |
| Sol_lycATHB-14-like        | HVSHLVYDNG | FMROQLHT    | -- | VNSTTTD  | -- | TCCESVVMVSG | QQQQ   | --  | NPMP |
| Sol_tubATHB-14-like_X1     | HVSHLVYDNG | FMROQLHT    | -- | QVNSTTTD | -- | TCCESVVMVD  | QQQQ   | --  | NPMP |
| Med_truATHB-14             | QVSHLVYENG | YMKQQLIHTVS | -- | ASAATTTD | -- | NSCDSVVMVSG | QNQQ   | --  | NPT  |
| Zea_mayNP_001142394.1      | QVSRLVFDNG | YMKNRLHS    | -- | PSVATTD  | -- | TSCESVVTSG  | QHQQQN | --  | PAV  |
| Vit_vinREVOLUTA            | QVSQLVCENG | YMRQQLQT    | -- | VSATTD   | -- | ASCESVVT    | ---    | --- | TP   |
| Ory_braHOX32-like          | QVSRLVYENG | YMRQQLHN    | -- | PSVATTD  | -- | TSCESVVTSG  | QHQQQN | --  | PAA  |
| Ric_comXP_002529946.1      | QVSQLVCENG | YMRQQLQT    | -- | ASAATD   | -- | ASCDSVVT    | ---    | --- | TP   |
| Tha_cacXP_007016749.1      | QVSQLVCENG | YMRQQLHT    | -- | VNASAATD | -- | ASCDSVVT    | ---    | --- | TP   |
| Fra_vesREVOLUTA-like       | QVSQLVCENG | YMRQQLHT    | -- | APATD    | -- | ASCDSVVT    | ---    | --- | TP   |
| Zea_mayNP_001146215.1      | QVSRLVFDNG | YMKNRLHS    | -- | PSVATTD  | -- | TSCESVVTSG  | QHKQQN | --  | PAV  |
| The_cacXP_007012152.1      | QVSQLVYENS | YFROQTQN    | -- | ATLATTD  | -- | TSCESVVTSG  | QH     | --- | HLTP |
| Pru_perppa001386mg         | QVSQLVYENS | YFROQTQN    | -- | TNLATTD  | -- | TSCESVVTSG  | QH     | --- | HLTP |
| Pop_triAAX19057.1          | QVSQLVYENS | YFROQTQN    | -- | ATNLATTD | -- | TSCESVVTSG  | QH     | --- | HLTP |
| Pop_triXP_002309538.2      | QVSQLVYENS | YFROQTQN    | -- | ATNLATTD | -- | TSCESVVTSG  | QH     | --- | HLTP |
| Fra_vesATHB-8-like         | QVSHLVYENS | YFROQTQN    | -- | TTLATTD  | -- | TSCESVVTSG  | QH     | --- | HLTP |
| Pop_triXP_002324794.1      | QVSQLVYENS | YFROQTQN    | -- | ATTLATTD | -- | TSCESVVTSG  | QH     | --- | RLTP |
| Vit_vin009744              | QVSQLVYENS | FFROQTQN    | -- | ATLATTD  | -- | TSCESVVTSG  | QH     | --- | HLTP |
| Gly_maxATHB-8-like         | QVSHLVYENS | FFROQTHN    | -- | NATLATTD | TN | TSCESVVTSG  | QR     | --- | NLTP |
| Sol_lycATHB-15-like        | QVSQLVYENS | FFROQTQT    | -- | AALATTD  | N  | NSCESVVTSG  | QH     | --- | NLTP |
| Gly_maxATHB-8-likeb        | QVSHLVYENS | FFROQTHN    | N  | NATLATTD | TN | TSCESVVTSG  | QR     | --- | NLTP |
| Med_truXP_003603630.1      | QVSHLVYENT | FFROQTQN    | -- | TTLATTD  | -- | TSCESVVTSG  | QQ     | --- | ---  |

|                            |                             |                    |                     |            |            |
|----------------------------|-----------------------------|--------------------|---------------------|------------|------------|
| AmTr_v1.0_scaffold00148.15 | Q- <b>RP</b> -PRDAN         | NPAGLLSIAE         | ETLAEFLSKA          | TGTAVDWVQM | PGMKPGPDSI |
| AmTr_v1.0_scaffold00056.60 | Q-HP-PRDA-                  | SPAGLLSIAE         | ETLAEFLSKA          | TGTAVEWVQM | PGMKPGPDSI |
| AmTr_v1.0_scaffold00155.45 | <b>P</b> PHP-PRDAN          | NPAGLLSIAE         | ETLAEFLSKA          | TGTAVDWVQM | LGMKPGPDSI |
| Ara_thaPHABULOSA           | Q-HQ-ORDAN                  | NPAGLLSIAE         | EALAEFLSKA          | TGTAVDWVQM | IGMKPGPDSI |
| Ara_thaATHB15              | Q-NP-ORDA-                  | SPAGLLSIAE         | ETLAEFLSKA          | TGTAVEWVQM | PGMKPGPDSI |
| Ara-thaPHAVOLUTA           | Q-HP-ORDVN                  | NPANLLSIAE         | ETLAEFLCKA          | TGTAVDWVQM | IGMKPGPDSI |
| Ara_thaATHB8               | Q-HQ-PRDA-                  | SPAGLLSIAD         | ETLTEFLSKA          | TGTAVEWVQM | PGMKPGPDSI |
| Ara_thaREVOLUTA            | Q- <b>HS</b> -LRDAN         | SPAGLLSIAE         | ETLAEFLSKA          | TGTAVDWVQM | PGMKPGPDSV |
| Vit_vinHOX32-like          | Q-HP-ORDAS                  | NPAGLLAIAE         | ETLAEFLSKA          | TGTAVDWVQM | IGMKPGPDSI |
| The_cacXP_007022870.1      | Q-HP-ORDAN                  | SPAGLLAIAE         | ETLAEFLSKA          | TGTAVDWVQM | IGMKPGPDSI |
| Ory_satHOX32               | T- <b>RP</b> -ORDAN         | NPAGLLAIAE         | ETLAEFLSKA          | TGTAVDWVQM | VGMKPGPDSI |
| Pru_perppa001343mg         | Q-HP-ORDAN                  | NPAGLLAIAE         | ETLAEFLSKA          | TGTAVDWVQM | IGMKPGPDSI |
| Bra_disHOX32-like          | <b>P</b> - <b>RP</b> -ORDAN | NPAGLLAIAE         | ETLAEFLSKA          | TGTAVDWVQM | VGMKPGPDSI |
| Pop_triPHABULOSA           | Q- <b>QP</b> -ORDAN         | NPAGLLAIAE         | ETLAEFLSKA          | TGTAVDWVQM | IGMKPGPDSI |
| Pop_triPHABULOSAb          | Q- <b>QP</b> -ORDAN         | NPAGLLTIAE         | ETLAEFLSKA          | TGTAVDWVQM | IGMKPGPDSI |
| Fra_vesHOX32-like          | Q-HP-ORDAN                  | NPAGLLAIAE         | ETLAEFLSKA          | TGTAVDWVQM | IGMKPGPDSI |
| Gly_maxATHB-14-like        | Q-HP-NRDAN                  | NPAGLLAIAE         | ETLAEFLSKA          | TGTAVDWVQM | IGMKPGPDSI |
| Gly_maxREVOLUTA-like       | Q-HT-LRDAS                  | NPAGLLSIAE         | ETLTEFLSKA          | TGTAVDWVQM | PGMKPGPDSV |
| Gly_maxREVOLUTA-likeb      | Q-HT-MRDAN                  | NPAGLLSIAE         | ETLTEFLSKA          | TGTAVDWVQM | PGMKPGPDSV |
| Pru_perREV IFL1            | Q- <b>HS</b> -LRDAN         | NPAGLLSIAE         | ETLAEFLSKA          | TGTAVDWVQM | PGMKPGPDSV |
| Ory_satHOX33               | L-HP-ORDAN                  | NPAGLLAIAE         | ETLAEFMSKA          | TGTAVEWVQM | VGMKPGPDSI |
| Sol_tubATHB-14-like        | Q-HP-ERDAN                  | NPAGLLAIAE         | ETLAEFLGKA          | TGTAVDWVQM | IGMKPGPDSI |
| The_cacXP_007022872.1      | Q-HP-ORDAN                  | SPAGLLAIAE         | ETLAEFLSKA          | TGTAVDWVQM | IGMKPGPDSI |
| Ory_satHOX33-like          | L-HP-ORDAN                  | NPAGLLAIAE         | ETLAEFMSKA          | TGTAVEWVQM | VGMKPGPDSI |
| Sol_lycREVOLUTA-like       | Q- <b>HS</b> -LRDAN         | NPAGLLPIAE         | ETLAEFLSKA          | TGTAVDWVPM | PGMKPGPDSV |
| Sol_lycHOX32-like          | Q-HP-ERDAN                  | NPAGLLAIAE         | ETLAEFLGKA          | TGTAVDWVQL | IGMKPGPDSI |
| Gly_maxATHB-14-likeb       | Q-HP- <b>Q</b> WDAN         | NPAGLLAIA <b>Q</b> | ETLAAFLSKA          | TGTAVNWVQM | IGMKPGPDSI |
| Pop_triXP_006378973.1      | Q- <b>HS</b> -LRDAN         | NPAGLLSLAE         | ETLAEFLSKA          | TGTAVDWVQM | PGMKPGPDSV |
| Ory_satACA64837.1          | L-HP-ORDAN                  | NPAGLLAIAE         | ETLAEFMSKA          | TGTAVEWVQM | VGMKPGPDSI |
| Vit_vin013992              | Q- <b>HS</b> -LRDAN         | NPAGLLSIAE         | ETLAEFLSKA          | TGTAVDWVQM | PGMKPGPDSV |
| Ory_satOsJ_11861           | T- <b>RP</b> -ORDAN         | NPAGLLAIAE         | ETLAEFLSKA          | TGTAVDWVQM | VGMKPGPDSI |
| Sol_tubREVOLUTA-like       | Q- <b>HS</b> -LRDAN         | NPAGLLPIAE         | ETLAEFLSKA          | TGTAVDWVPM | PGMKPGPDSV |
| Gly_maxATHB-14-likec       | Q-HP- <b>Q</b> WDAN         | NPAGLLAIA <b>Q</b> | ETLVEFLSKA          | TGTAVNWVQM | IGMKPGPDSI |
| The_cacXP_007024277.1      | Q-HP-PRDA-                  | SPAGLLSIAE         | ETLAEFLSKA          | TGTAVEWVQM | PGMKPGPDSI |
| Vit_vinATHB-15-like        | Q-HP-PRDA-                  | SPAGLLSIAE         | ETLTEFLSKA          | TGTAVEWVQM | PGMKPGPDSI |
| Ric_comXP_002515977.1      | Q-HQ-PRDA-                  | SPAGLLSIAE         | ETLTEFLSKA          | TGTAVEWVQM | PGMKPGPDSI |
| The_cacXP_007016751.1      | Q- <b>HS</b> -LRDAN         | NPAGLLSIAE         | ETLAEFLSKA          | TGTAVDWVQM | PGMKPGPDSV |
| Sol_tubHOX32-like          | Q-HP-ERDAN                  | NPAGLLAIAE         | ETLAEFLGKA          | TGTAVDWVQL | IGMKPGPDSI |
| Sol_lycATHB-14-like        | <b>Q</b> HHP-ORDAN          | SPAGLLAIAE         | ETLTEFLGKA          | TGTAVDWVQM | IGMKPGPESI |
| Sol_tubATHB-14-like_X1     | <b>Q</b> HHP-ORDAN          | SPAGLLAIAE         | ETLTEFLGKA          | TGTAVDWVQM | IGMKPGPESI |
| Med_truATHB-14             | Q- <b>RP</b> -ORDAN         | NPAGLLAVAE         | ETLAEFLSKA          | TGTAVDWVQM | IGMKPGPESI |
| Zea_mayNP_001142394.1      | L- <b>HPP</b> -ORDAN        | NPAGLLAIAE         | ETLAEFMSKA          | TGTAVNWVQM | VGMKPGPDSV |
| Vit_vinREVOLUTA            | Q- <b>HS</b> -LRDAN         | NPAGLLSIAE         | ETLAEFLSKA          | TGTAVDWVQM | PGMKPGPDSV |
| Ory_braHOX32-like          | <b>A</b> - <b>RP</b> -ORDAN | NPAGLLAIAE         | ETLAEFLSKA          | TGTAVDWVQM | VGMKPGPDSI |
| Ric_comXP_002529946.1      | Q- <b>HS</b> -LRDAN         | NPAGLLSIAE         | ETLAEFLSKA          | TGTAVDWVQM | PGMKPGPDSV |
| Tha_cacXP_007016749.1      | Q- <b>HS</b> -LRDAN         | NPAGLLSIAE         | ETLAEFLSKA          | TGTAVDWVQM | PGMKPGPDSV |
| Fra_vesREVOLUTA-like       | Q- <b>HS</b> -LRDAN         | NPAGLLSIAE         | ETLAEFLSKA          | TGTAVDWVQM | PGMKPGPDSV |
| Zea_mayNP_001146215.1      | L- <b>HPP</b> -ORDAN        | NPAGLLAIAE         | ETLAEFMSKA          | TGTAVNWVQM | VGMKPGPDSV |
| The_cacXP_007012152.1      | Q-HP-PRDA-                  | SPAGLLSIAE         | ETLTEFLSKA          | TGTAVEWVQM | PGMKPGPDSI |
| Pru_perppa001386mg         | Q-HP-PRDA-                  | SPAGLLSIAE         | ETLAEFLSKA          | TGTAVEWVQM | PGMKPGPDSI |
| Pop_triAAX19057.1          | Q-HP-PRDA-                  | SPAGLLSIAE         | ETLA <b>Q</b> FLSKA | TGTAVEWVQM | PGMKPGPDSI |
| Pop_triXP_002309538.2      | Q-HP-PRDA-                  | SPAGLLSIAE         | ETLA <b>Q</b> FLSKA | TGTAVEWVQM | PGMKPGPDSI |
| Fra_vesATHB-8-like         | Q-HP-PRDA-                  | SPAGLLSIAE         | ETLAEFLSKA          | TGTAVEWVQL | PGMKPGPDSI |
| Pop_triXP_002324794.1      | Q-HP-PRDA-                  | SPAGLLSIAE         | ENLA <b>Q</b> FLSKA | TGTAVEWVQM | PGMKPGPDSI |
| Vit_vin009744              | Q-HP-PRDA-                  | SPAGLLSIAE         | ETLTEFLSKA          | TGTAVEWVQM | PGMKPGPDSI |
| Gly_maxATHB-8-like         | <b>Q</b> QHP-PRDA-          | SPAGLLSIAE         | ETLAEFLSKA          | TGTAVEWVQM | PGMKPGPDSI |
| Sol_lycATHB-15-like        | Q- <b>RP</b> -PRDA-         | SPAGLLSLAE         | ETLTEFLSKA          | TGTAVEWVQM | PGMKPGPDSI |
| Gly_maxATHB-8-likeb        | <b>Q</b> QHP-PRDA-          | SPAGLLSIAE         | ETLAEFLSKA          | TGTAVEWVQM | PGMKPGPDSI |
| Med_truXP_003603630.1      | -- <b>H</b> PPORDA-         | SPAGLLSIAE         | ETLAEFLSKA          | TGTAVEWVQM | PGMKPGPDSI |

|                            |                     |                    |                     |                             |                              |
|----------------------------|---------------------|--------------------|---------------------|-----------------------------|------------------------------|
| AmTr_v1.0_scaffold00148.15 | GIVAI <b>SHS</b> CS | GVAA---RAC         | GLV <b>SLEPT</b> KV | VEIL <b>KDR</b> MSW         | FRDCRN <b>FD</b> IL          |
| AmTr_v1.0_scaffold00056.60 | GIVAI <b>SHG</b> CT | GVAA---RAC         | GLV <b>GLEPT</b> KV | SEIL <b>KDR</b> P <b>TW</b> | FRDCRS <b>VE</b> VL          |
| AmTr_v1.0_scaffold00155.45 | GIVAV <b>SHN</b> CS | GMAA---RVC         | GLV <b>SLEP</b> AKV | AEIL <b>KDR</b> PSW         | FRDCRS <b>SH</b> DVL         |
| Ara_thaPHABULOSA           | GIVAI <b>SRN</b> CS | GIAA---RAC         | GLV <b>SLEP</b> MKV | AEIL <b>KDR</b> PSW         | LRDCRS <b>SV</b> DTL         |
| Ara_thaATHB15              | GIIAI <b>SHG</b> CT | GVAA---RAC         | GLV <b>GLEPT</b> RV | AEIV <b>KDR</b> PSW         | FRECR <b>A</b> VEVM          |
| Ara-thaPHAVOLUTA           | GIVAV <b>SRN</b> CS | GIAA---RAC         | GLV <b>SLEP</b> MKV | AEIL <b>KDR</b> PSW         | FRDCR <b>CV</b> ETL          |
| Ara_thaATHB8               | GIVAI <b>SHG</b> CT | GIAA---RAC         | GLV <b>GLD</b> PTRV | AEIL <b>KDK</b> PCW         | LRDCR <b>SL</b> DIV          |
| Ara_thaREVOLUTA            | GIFAI <b>SQR</b> CN | GVAA---RAC         | GLV <b>SLEP</b> MKI | AEIL <b>KDR</b> PSW         | FRDCR <b>S</b> LEVF          |
| Vit_vinHOX32-like          | GIVAV <b>SRN</b> CS | GVAA---RAC         | GLV <b>SLEPT</b> KV | AEIL <b>KDR</b> PSW         | FRDCR <b>CL</b> DVL          |
| The_cacXP_007022870.1      | GIVAV <b>SRN</b> CS | GVAA---RAC         | GLV <b>SLEPT</b> KV | AEIL <b>KDR</b> PSW         | FRDCR <b>CL</b> DVL          |
| Ory_satHOX32               | GIIAV <b>SHN</b> CS | GVAA---RAC         | GLV <b>SLEPT</b> KV | AEIL <b>KDR</b> PSW         | YRDCR <b>CV</b> DVL          |
| Pru_perppa001343mg         | GIVAV <b>SRN</b> CS | GVAA---RAC         | GLV <b>SLEPT</b> KV | AEIL <b>KDR</b> TSW         | FRDCR <b>CL</b> DVL          |
| Bra_disHOX32-like          | GIIAV <b>SHN</b> CS | GVAA---RAC         | GLV <b>SLEPT</b> KV | AEIL <b>KDR</b> PSW         | YRDCR <b>CV</b> DVL          |
| Pop_triPHABULOSA           | GIVAV <b>SRN</b> CS | GVAA---RAC         | GLV <b>SLEPT</b> KV | AEIL <b>KDR</b> PSW         | FRDCR <b>CL</b> DIL          |
| Pop_triPHABULOSAb          | GIVAV <b>SRN</b> CS | GVAA---RAC         | GLV <b>SLEP</b> IKV | AEIL <b>KDR</b> PSW         | FRDCR <b>CL</b> DIM          |
| Fra_vesHOX32-like          | GIVAV <b>SRN</b> TS | GVAA---RAC         | GLV <b>SLEPT</b> KV | AEIL <b>KDR</b> PSW         | FRDCR <b>CL</b> DVL          |
| Gly_maxATHB-14-like        | GIVAV <b>SRN</b> CS | GVAA---RAC         | GLV <b>SLEPT</b> KV | AEIL <b>KDR</b> QSW         | YRDCR <b>CV</b> DVL          |
| Gly_maxREVOLUTA-like       | GIFAI <b>SQS</b> CS | GVAA---RAC         | GLV <b>SLEPT</b> KI | AEIL <b>KDR</b> PSW         | FRDCR <b>S</b> LEVF          |
| Gly_maxREVOLUTA-likeb      | GIFAI <b>SQS</b> CS | GVAA---RAC         | GLV <b>SLEPT</b> KI | AEIL <b>KDR</b> PSW         | FRDCR <b>S</b> LEVF          |
| Pru_perREV_IFL1            | GIFAI <b>SQS</b> CS | GVAA---RAC         | GLV <b>SLEPT</b> KI | AEIL <b>KDR</b> PSW         | FRDCR <b>S</b> LEVF          |
| Ory_satHOX33               | GIIAV <b>SHN</b> CS | GVAA---RAC         | GLV <b>SLEPT</b> KV | AEIL <b>KDR</b> PSW         | YRDCR <b>CV</b> DI I         |
| Sol_tubATHB-14-like        | GIVAV <b>SRN</b> CS | GVAA---RAC         | GLV <b>SLEPT</b> KV | AEIL <b>KDR</b> PSW         | YRDCR <b>CL</b> NVL          |
| The_cacXP_007022872.1      | GIVAV <b>SRN</b> CS | GVAA---RAC         | GLV <b>SLEPT</b> KV | AEIL <b>KDR</b> PSW         | FRDCR <b>CL</b> DVL          |
| Ory_satHOX33-like          | GIIAV <b>SHN</b> CS | GVAA---RAC         | GLV <b>SLEPT</b> KV | AEIL <b>KDR</b> PSW         | YRDCR <b>CV</b> DI I         |
| Sol_lycREVOLUTA-like       | GIFAI <b>SHS</b> CS | GVAA---RAC         | GLV <b>SLEPT</b> KI | ADIL <b>KDR</b> PSW         | FRDCR <b>N</b> VEVI          |
| Sol_lycHOX32-like          | GIVAV <b>SRN</b> CS | GVAA---RAC         | GLV <b>SLEPT</b> KV | AEIL <b>KDC</b> PSW         | YRDCR <b>CL</b> NVL          |
| Gly_maxATHB-14-likeb       | GIVAV <b>SRN</b> CS | GVAA---RAC         | GLV <b>SLEPT</b> KV | AEIL <b>KDR</b> PSW         | YRDCR <b>CL</b> NVL          |
| Pop_triXP_006378973.1      | GIFAI <b>SQR</b> CS | GVAA---RAC         | GLV <b>SLEPT</b> KL | AEIL <b>KDR</b> QSW         | FRDCR <b>N</b> LEVF          |
| Ory_satACA64837.1          | GII <b>TV</b> SHNCS | GVAA---RAC         | GLV <b>SLEPT</b> KV | AEIL <b>KDR</b> PSW         | YRDCR <b>CV</b> DI I         |
| Vit_vin013992              | GIFAI <b>SHS</b> CS | GGSS <b>SM</b> RSC | K <b>FRT</b> LK---  | -EIL <b>KDR</b> PSW         | FRDCR <b>S</b> LEVF          |
| Ory_satOsJ_11861           | GIIAV <b>SHN</b> CS | GVAA---RAC         | GLV <b>SLEPT</b> KV | AEIL <b>KDR</b> PSW         | YRDCR <b>CV</b> DVL          |
| Sol_tubREVOLUTA-like       | GIFAI <b>SHS</b> CS | GVAA---RAC         | GLV <b>SLEPT</b> KI | AEIL <b>KDR</b> PSW         | FRDCR <b>N</b> VEVI          |
| Gly_maxATHB-14-likec       | GIVAV <b>SRN</b> CS | GVAA---RAC         | GLV <b>SLEPT</b> KV | AEIL <b>KDR</b> PSW         | YRDCR <b>CL</b> NVL          |
| The_cacXP_007024277.1      | GIVAI <b>SHG</b> CT | GVAA---RAC         | GLV <b>GLEPT</b> RV | AEIL <b>KDR</b> PSW         | FRDCR <b>AV</b> DVL          |
| Vit_vinATHB-15-like        | GIVAI <b>SHG</b> CT | GVAA---RAC         | GLV <b>GLEPT</b> RV | AEIL <b>KDR</b> PSW         | FRDCR <b>AV</b> DVL          |
| Ric_comXP_002515977.1      | GIIAI <b>SHG</b> CT | GVAA---RAC         | GLV <b>GLEPT</b> RV | AEIL <b>KDR</b> PSW         | FRDCR <b>AV</b> DVL          |
| The_cacXP_007016751.1      | GIFAI <b>SQS</b> CS | GVAA---RAC         | GLV <b>SLEPT</b> KI | AEIL <b>KDR</b> PSW         | FRDCR <b>N</b> LEVF          |
| Sol_tubHOX32-like          | GIVAV <b>SRN</b> CS | GVAA---RAC         | GLV <b>SLEPT</b> KV | AEIL <b>KDC</b> PSW         | YRDCR <b>CL</b> NVL          |
| Sol_lycATHB-14-like        | GIVAV <b>SRN</b> CN | GVAA---RAC         | GLV <b>SLEP</b> MKV | AEIL <b>KDR</b> PSW         | YRDCR <b>CL</b> DIL          |
| Sol_tubATHB-14-like_X1     | GIVAV <b>SRN</b> CN | GVAA---RAC         | GLV <b>SLEP</b> MKV | AEIL <b>KDR</b> PSW         | YRDCR <b>CL</b> DIL          |
| Med_truATHB-14             | GIVAV <b>SRN</b> SS | GIAA---RAC         | GLV <b>SLEPT</b> KV | AEIL <b>KDR</b> LSW         | YRDCR <b>CV</b> DVL          |
| Zea_mayNP_001142394.1      | GIIAV <b>SHN</b> CS | GVAA---RAC         | GLV <b>SLEPT</b> KV | AEIL <b>KDR</b> ASW         | YRDCR <b>HV</b> DVL          |
| Vit_vinREVOLUTA            | GIFAI <b>SHS</b> CS | GVAA---RAC         | GLV <b>SLEP</b> SKI | AEIL <b>KDR</b> PSW         | FRDCR <b>S</b> LEVF          |
| Ory_braHOX32-like          | GIIAV <b>SHN</b> CS | GVAA---RAC         | GLV <b>SLEPT</b> KV | AEIL <b>KDR</b> PSW         | YRDCR <b>CV</b> DVL          |
| Ric_comXP_002529946.1      | GIFAI <b>SQS</b> CS | GVAA---RAC         | GLV <b>SLEPT</b> KI | AEIL <b>KDR</b> PSW         | FRDCR <b>S</b> LEVF          |
| Tha_cacXP_007016749.1      | GIFAI <b>SQS</b> CS | GVAA---RAC         | GLV <b>SLEPT</b> KI | AEIL <b>KDR</b> PSW         | FRDCR <b>N</b> LEVF          |
| Fra_vesREVOLUTA-like       | GIFAI <b>SQS</b> CS | GVAA---RAC         | GLV <b>SLEPT</b> KI | AEIL <b>KDR</b> PSW         | FRDCR <b>S</b> LEVF          |
| Zea_mayNP_001146215.1      | GIIAV <b>SHN</b> CS | GVAA---RAC         | GLV <b>SLEPT</b> KV | AEIL <b>KDR</b> ASW         | YRDCR <b>RV</b> DIL          |
| The_cacXP_007012152.1      | GIVAI <b>SHG</b> CT | GVAA---RAC         | GLV <b>GLD</b> PTRV | AEIL <b>KDR</b> PSW         | FRDCR <b>AV</b> DVM          |
| Pru_perppa001386mg         | GIVAI <b>SHG</b> CT | GVAA---RAC         | GLV <b>GLEPT</b> RV | AEIL <b>KDR</b> PSW         | FR <b>N</b> CR <b>S</b> VDVL |
| Pop_triAAX19057.1          | GIVAI <b>SHG</b> CT | GVAA---RAC         | GLV <b>GLEPT</b> RV | AEIL <b>KDR</b> PSW         | FRDCR <b>AV</b> DVV          |
| Pop_triXP_002309538.2      | GIVAI <b>SHG</b> CT | GVAA---RAC         | GLV <b>GLEPT</b> RV | AEIL <b>KDR</b> PSW         | FRDCR <b>AV</b> DVV          |
| Fra_vesATHB-8-like         | GIVAI <b>SHG</b> CT | GVAA---RAC         | GLV <b>GLEPT</b> RV | SEIL <b>KDR</b> PSW         | FR <b>N</b> CR <b>S</b> VDVL |
| Pop_triXP_002324794.1      | GIVAI <b>SHG</b> CT | GVAA---RAC         | GLV <b>GLEPT</b> RV | AEIL <b>KDR</b> PSW         | FRDCR <b>AV</b> DVI          |
| Vit_vin009744              | GIVAI <b>SHG</b> CT | GVAA---RAC         | GLV <b>SLEPT</b> RV | AEIL <b>KDR</b> PSW         | YRDCR <b>N</b> VDVL          |
| Gly_maxATHB-8-like         | GIVAI <b>SHG</b> CP | GVAA---RAC         | GLV <b>GLEP</b> ARV | AEIL <b>KDR</b> LSW         | FRDCR <b>T</b> VDVL          |
| Sol_lycATHB-15-like        | GIIAI <b>SHG</b> CS | GVAS---RAC         | GLV <b>GLEPT</b> RV | AEIL <b>KDR</b> PSW         | FRDCR <b>AV</b> DVL          |
| Gly_maxATHB-8-likeb        | GIVAI <b>SHG</b> CP | GVAA---RAC         | GLV <b>GLEPT</b> RV | AEIL <b>KDR</b> LSW         | FRDCR <b>T</b> VDVL          |
| Med_truXP_003603630.1      | GIVAI <b>SHG</b> SP | GVAA---RAC         | GLV <b>GLEP</b> ARV | AEIL <b>KDR</b> LSW         | YRDCR <b>T</b> VDVL          |

|                            |       |         |            |    |            |     |      |           |            |
|----------------------------|-------|---------|------------|----|------------|-----|------|-----------|------------|
| AmTr_v1.0_scaffold00148.15 | TVLP  | IGSGGT  | IELIYMQT   | -- | YAPTTLA    | --- | ---- | PARDFW    | TLRYTCGLED |
| AmTr_v1.0_scaffold00056.60 | TALST | GNGGT   | IELLYMQM   | -- | YAPTTLA    | --- | ---- | SARDFW    | LLRYTSVLED |
| AmTr_v1.0_scaffold00155.45 | TVFP  | PAGNGGT | IELIYMQT   | -- | YAPTTLA    | --- | ---- | AARDFW    | TLRYTTGLDD |
| Ara_thaPHABULOSA           | SVI   | PAGNGGT | IELIYTQM   | -- | YAPTTLA    | --- | ---- | AARDFW    | TLRYSTCLED |
| Ara_thaATHB15              | NVLPT | TANGGT  | VELLYMQL   | -- | YAPTTLA    | --- | ---- | PPRDFW    | LLRYTSVLED |
| Ara-thaPHAVOLUTA           | NVI   | PTGNGGT | IELVNTQI   | -- | YAPTTLA    | --- | ---- | AARDFW    | TLRYSTSLED |
| Ara_thaATHB8               | NVLST | ANGGT   | LELIYMQL   | -- | YAPTTLA    | --- | ---- | PARDFW    | MLRYTSVMED |
| Ara_thaREVOLUTA            | TMFP  | PAGNGGT | IELVYMQT   | -- | YAPTTLA    | --- | ---- | PARDFW    | TLRYTTSLDN |
| Vit_vinHOX32-like          | SVI   | PTGNGGT | IELIYMQT   | -- | YAPTTLA    | --- | ---- | SARDFW    | TLRYTTSLED |
| The_cacXP_007022870.1      | SVI   | PTGNGGT | IELIYMQT   | -- | YAPTTLA    | --- | ---- | AARDFW    | TLRYTTSLED |
| Ory_sathOX32               | HVI   | PTGNGGT | IELIYMQT   | -- | YAPTTLA    | --- | ---- | APRDFW    | TLRYTSGLED |
| Pru_perppa001343mg         | SLI   | PAGNGGT | IELIYMQT   | -- | YAPTTLA    | --- | ---- | AARDFW    | TLRYTTSLED |
| Bra_disHOX32-like          | QII   | PTGNGGT | IELIYMQT   | -- | YAPTTLA    | --- | ---- | APRDFW    | ILRYTSGLED |
| Pop_tripHABULOSA           | SVI   | PTGSGGT | IELIYMQT   | -- | YAPTTLA    | --- | ---- | AARDFW    | TLRYTTTLED |
| Pop_tripHABULOSAb          | SVI   | PTGSGGT | IELIYMQT   | -- | YAPTTLA    | --- | ---- | AARDFW    | TLRYTTTLED |
| Fra_vesHOX32-like          | SI    | PAGNGGT | IELLYMQI   | -- | YAPTTLA    | --- | ---- | AARDFW    | TLRYTTTLED |
| Gly_maxATHB-14-like        | SIV   | PTGNGGT | IELMYMQT   | -- | YAPTTLA    | --- | ---- | AARDFW    | TLRYTTSLED |
| Gly_maxREVOLUTA-like       | TMFP  | PAGNGGT | IELVYTQT   | -- | YAPTTLA    | --- | ---- | PARDFW    | TLRYTTSLEN |
| Gly_maxREVOLUTA-likeb      | TMFP  | PAGNGGT | IELVYTQT   | -- | YAPTTLA    | --- | ---- | PARDFW    | TLRYTTSLEN |
| Pru_perREV_IFL1            | TMFP  | PAGNGGT | IELIYTQT   | -- | YAPSTLA    | --- | ---- | PARDFW    | TLRYTTSLDN |
| Ory_sathOX33               | HVI   | PTGNGGT | IELIYMQT   | -- | YAPTTLA    | --- | ---- | APRDFW    | TLRYTSGLED |
| Sol_tubATHB-14-like        | SVI   | PTGNGGT | IELIYLQT   | -- | YAPTTLA    | --- | ---- | TARDFW    | TLRYTTSLED |
| The_cacXP_007022872.1      | SVI   | PTGNGGT | IELIYMQT   | -- | YAPTTLA    | --- | ---- | AARDFW    | TLRYTTSLED |
| Ory_sathOX33-like          | HVI   | PTGNGGT | IELIYMQT   | -- | YAPTTLA    | --- | ---- | APRDFW    | TLRYTSGLED |
| Sol_lycREVOLUTA-like       | TMFP  | PAGNGGT | VELLYTQI   | -- | YAPTTLA    | --- | ---- | PARDFW    | TLRYTTTLDN |
| Sol_lycHOX32-like          | SVI   | PTGNGGT | IELIYLQT   | -- | YAPTTLA    | --- | ---- | TARDFW    | TLRYTTSLED |
| Gly_maxATHB-14-likeb       | SVI   | PTGNGGT | IELMYMQT   | -- | YAPTTLA    | --- | ---- | AARDFW    | TLRYTTSLED |
| Pop_triXP_006378973.1      | TVFP  | PAGNGGT | IELLYSQI   | -- | YAPTTLA    | --- | ---- | PARDFW    | TLRYTINLEN |
| Ory_satACĀ64837.1          | HVI   | PTGNGGT | IELIYMQT   | -- | HAPTTLA    | --- | ---- | APRDFW    | TLRYTSGLED |
| Vit_vin013992              | TMFP  | PAGNGGT | VELLYTQI   | -- | YAPTTLA    | --- | ---- | PARDFW    | TLRYTTSLDN |
| Ory_satOsJ_11861           | HVI   | PTGNGGT | IELIYMQT   | -- | YAPTTLA    | --- | ---- | APRDFW    | ILRYTSGLED |
| Sol_tubREVOLUTA-like       | TIF   | PAGNGGT | VELLYTQI   | -- | YAPTTLA    | --- | ---- | PARDLW    | TLRYTTTLDN |
| Gly_maxATHB-14-likec       | SVV   | SAGNGGT | IELMYMQT   | -- | YAPTTLA    | --- | ---- | AARDFW    | TLRYSTSLED |
| The_cacXP_007024277.1      | NVLPT | TANGGT  | IELLYMQL   | -- | YAPTTLA    | --- | ---- | PARDFW    | LLRYTSVLED |
| Vit_vinATHB-15-like        | NVLPT | TANGGT  | IELLYMQL   | -- | YAPTTLA    | --- | ---- | PARDFW    | LLRYTSVMED |
| Ric_comXP_002515977.1      | NVLPT | TANGGT  | IELLYMQL   | -- | YAPTTLA    | --- | ---- | PARDFW    | LLRYTSVLED |
| The_cacXP_007016751.1      | TMFP  | PAGNGGT | IELVYTQT   | -- | YAPTTLA    | --- | ---- | PARDFW    | TLRYTTTLEN |
| Sol_tubHOX32-like          | SVI   | PTGNGGT | IELIYLQT   | -- | YAPTTLA    | --- | ---- | TARDFW    | TLRYTTSLED |
| Sol_lycATHB-14-like        | NVI   | PTGNGGT | IELIYLQT   | -- | YAPTTLA    | --- | ---- | PARDFW    | TLRYTTSLED |
| Sol_tubATHB-14-like_X1     | NVI   | PTGNGGT | IELIYLQT   | -- | YAPTTLA    | --- | ---- | PARDFW    | TLRYTTSLED |
| Med_truATHB-14             | SIV   | PTGGG   | IELMYMQVLF | -- | YSTKELTMPF | --- | ---- | LFLLSRDFW | TLRYTTSLED |
| Zea_mayNP_001142394.1      | HVI   | PTGNGGT | IELIYMQT   | -- | YALTTLA    | --- | ---- | EPRDFW    | TLRYTSGLDD |
| Vit_vinREVOLUTA            | TMFP  | PAGNGGT | VELLYTQI   | -- | YAPTTLA    | --- | ---- | PARDFW    | TLRYTTSLDN |
| Ory_braHOX32-like          | HVI   | PTGNGGT | IELIYMQT   | -- | YAPTTLA    | --- | ---- | APRDFW    | TLRYTSGLED |
| Ric_comXP_002529946.1      | TMFP  | PAGNGGT | IELVYSQV   | -- | YAPTTLA    | --- | ---- | PARDFW    | TLRYTSSLDN |
| Tha_cacXP_007016749.1      | TMFP  | PAGNGGT | IELVYTQT   | -- | YAPTTLA    | --- | ---- | PARDFW    | TLRYTTTLEN |
| Fra_vesREVOLUTA-like       | TMFP  | PAGNGGT | IELIYTQT   | -- | YAPTTLA    | --- | ---- | PARDFW    | TLRYTTSLDN |
| Zea_mayNP_001146215.1      | HVI   | PTGNGGT | IELIYMQT   | -- | YALTTLA    | --- | ---- | EPRDFW    | TLRYTSGLDD |
| The_cacXP_007012152.1      | NVLST | GNGGT   | IELLYMQL   | -- | YAPTTLA    | --- | ---- | PARDFW    | LLRYTSVLED |
| Pru_perppa001386mg         | NVLST | GNGGT   | IELLYMQL   | -- | YAPTTLA    | --- | ---- | PARDFW    | LLRYTSVLED |
| Pop_triAAX19057.1          | NALST | GSGGT   | IELLYMQL   | -- | YAPTTLA    | --- | ---- | PARDFW    | LLRYTSVLED |
| Pop_triXP_002309538.2      | NALST | GSGGT   | IELLYMQL   | -- | YAPTTLA    | --- | ---- | PARDFW    | LLRYTSVLED |
| Fra_vesATHB-8-like         | NVLST | GNGGT   | IELLYMQL   | -- | YAPTTLA    | --- | ---- | PARDFW    | LLRYTSVLED |
| Pop_triXP_002324794.1      | NAMST | TANGGT  | IELLYMQL   | -- | YAPTTLA    | --- | ---- | PARDFL    | LLRYTSVLED |
| Vit_vin009744              | NVLST | GNGGT   | IELLYMQL   | -- | YAPTTLA    | --- | ---- | PARDFW    | LLRYTSVLED |
| Gly_maxATHB-8-like         | NVMST | GNGGT   | IELLYMQL   | -- | YAPTTLA    | --- | ---- | PGRDFW    | LLRYTSLLED |
| Sol_lycATHB-15-like        | NVMST | GNGGT   | IELLYMQL   | -- | YAPTTLA    | --- | ---- | PARDFW    | LMRYTSVMED |
| Gly_maxATHB-8-likeb        | NVMST | GNGGT   | IELLYMQL   | -- | YAPTTLA    | --- | ---- | PGRDFW    | LLRYTSLLED |
| Med_truXP_003603630.1      | NVMST | GNGGT   | IELLYMQL   | -- | YAPTTLA    | --- | ---- | PGRDFW    | LLRYTSLLED |

|                            |            |            |            |            |            |
|----------------------------|------------|------------|------------|------------|------------|
| AmTr_v1.0_scaffold00148.15 | GSLVVCERSL | TSSNGSPHGQ | PVPNFVRAEM | LPSGYLIRPC | EGGGSIIHIV |
| AmTr_v1.0_scaffold00056.60 | GSLVVCERSL | SNTQGGPSMP | PVQFVRAEM  | HPSGYLIRPC | EGGGSIIHLV |
| AmTr_v1.0_scaffold00155.45 | GSLVVCERSL | TSSTGGPSGP | TSLSFVRAEM | MPSGYLIRPC | EGGGSIIHIV |
| Ara_thaPHABULOSA           | GSYVVCERSL | TSATGGPTGP | PSSNFVRAEM | KPSGFLIRPC | DGGGSILHIV |
| Ara_thaATHB15              | GSLVVCERSL | KSTQNGPSMP | LVQNFVRAEM | LSSGYLIRPC | DGGGSIIHIV |
| Ara-thaPHAVOLUTA           | GSYVVCERSL | TSATGGPNGP | LSSSFVRAKM | LSSGFLIRPC | DGGGSIIHIV |
| Ara_thaATHB8               | GSLVICERSL | NNTQNGPSMP | PSPHFVRAEI | LPSGYLIRPC | EGGGSILHIV |
| Ara_thaREVOLUTA            | GSFVVCERSL | SGSGAGPNA  | SASQFVRAEM | LSSGYLIRPC | DGGGSIIHIV |
| Vit_vinHOX32-like          | GSLVICERSL | TSSTGGPTGP | PASSYIRAEM | LPSGYLIRPC | EGGGSIIHIV |
| The_cacXP_007022870.1      | GSLVICERSL | TSSTGGPTGP | PTSSFVRAEM | LPSGFLIRPC | EGGGSIIHIV |
| Ory_satHOX32               | GSLVICERSL | TQSTGGPSGP | NTPNFVRAEV | LPSGYLIRPC | EGGGSMIHIV |
| Pru_perppa001343mg         | GSLVVCERSL | TSSTGGPTGP | PSASFVRAEM | LPSGYLIRPC | EGGGSIIHIV |
| Bra_disHOX32-like          | GSLVICERSL | TQATGGPSGP | NTPNFVRAEV | LPSGYLIRPC | EGGGSMIHIV |
| Pop_triPHABULOSA           | GSLVICERSL | TSSTGGPTGP | PPSSFIRAEM | LPSGYLIRPC | EGGGSIIHIV |
| Pop_triPHABULOSAb          | GSLVICERSL | TSSTGGPTGP | PSSSFVRADM | LPSGYLIRPC | EGGGSIIHIV |
| Fra_vesHOX32-like          | GSLVICERSL | TSSTGGPTGT | PSPSFVRAEM | LPSGYLIRPC | EGGGSIIHIV |
| Gly_maxATHB-14-like        | GSLVICERSL | TSSTGGPAGP | PSTTFVRAEM | LPSGFLIRPC | EGGGSIIHIV |
| Gly_maxREVOLUTA-like       | GSLVVCERSL | SGSGTGPNPA | AAAQFVRAET | LPSGYLIRPC | EGGGSIIHIV |
| Gly_maxREVOLUTA-likeb      | GSLVVCERSL | SGSGTGPNPA | AAAQFVRAET | LPSGYLIRPC | EGGGSIIHIV |
| Pru_perREV_IFL1            | GSFVVCERSL | SGSGAGPNA  | SAAQFVRAEM | LPSGYLIRPC | EGGGSIIHIV |
| Ory_satHOX33               | GSLVICERSL | TQSTGGPSGP | NTPNFIRAEM | LPSGYLIRPC | EGGGSMIYIV |
| Sol_tubATHB-14-like        | GSLVICERSL | TTATGGPTGP | PATSFVRAEM | LPSGYLIRPC | EGGGSMIHIV |
| The_cacXP_007022872.1      | GSLVICERSL | TSSTGGPTGP | PTSSFVRAEM | LPSGFLIRPC | EGGGSIIHIV |
| Ory_satHOX33-like          | GSLVICERSL | TQSTGGPSGP | NTPNFIRAEM | LPSGYLIRPC | EGGGSMIYIV |
| Sol_lycREVOLUTA-like       | GSLVVCERSL | SGNGGPNPT  | AASQFVRAQM | LPSGYLIRPC | DGGGSIIHIV |
| Sol_lycHOX32-like          | GSLVICERSL | TTATGGPTGP | PATSFVRAEM | LPSGYLIRPC | EGGGSMIHIV |
| Gly_maxATHB-14-likeb       | GSLVICERSL | TSSTGGPTGP | AASNFVRAEM | LPSGYLIRSC | EGGGSIVHIV |
| Pop_triXP_006378973.1      | GSLVVCERSL | SGSGAGPNA  | AAAQFVRAEM | LPSGYLIRPC | EGGGSIIHIV |
| Ory_satACA64837.1          | GSLVICERSL | TQSTGGPSGP | NLNFIRAEM  | LPSGYLIRPC | EGGGSMIYIV |
| Vit_vin013992              | GSLVVCERSL | SGSGAGPNTA | AAAQFVRAEM | LPSGYLIRPC | EGGGSIIHIV |
| Ory_satOsJ_11861           | GSLVICERSL | TQSTGGPSGP | NTPNFVRAEV | LPSGYLIRPC | EGGGSMIHIV |
| Sol_tubREVOLUTA-like       | GSLVVCERSL | SGNGGPNPA  | AASQFVRAQM | LPSGYLIRPC | DGGGSIIHIV |
| Gly_maxATHB-14-likec       | GSLVICERSL | TSSTGGPTGP | AASNFIRAEM | LPSGYLIRSC | EGGGSIIHIV |
| The_cacXP_007024277.1      | GSLVVCERSL | KNTQNGPSMP | AVQHFVRAEM | LPSGYLIRPC | EGGGSIIHIV |
| Vit_vinATHB-15-like        | GSLVVCERSL | KNTQNGPSMP | PVQHFVRAEM | LPSGYLIRPC | EGGGSIIHIV |
| Ric_comXP_002515977.1      | GSLVICERSL | KNTQNGPSMP | PVQHFVRAEM | LPSGYLIRPC | EGGGSIIHIV |
| The_cacXP_007016751.1      | GSLVVCERSL | SGSGAGPSAA | AAAQFVRAEM | LPSGYLIRPC | EGGGSIIHIV |
| Sol_tubHOX32-like          | GSLVICERSL | TTATGGPTGP | PATSFVRAEM | LPSGYLIRPC | EGGGSMIHIV |
| Sol_lycATHB-14-like        | GSLVICERSL | TSNTGGPVGP | PATSSVRAKM | LPSGFLIRPC | EGGGSIIHIV |
| Sol_tubATHB-14-like_X1     | GSLVICERSL | TSNTGGPVGP | PATSSVRAKM | LPSGFLIRPC | EGGGSIIHIV |
| Med_truATHB-14             | GSLVICERSL | NASTGGPTGP | SPSNFVRAEM | LPSGFLIRPC | EGGGSIIHIV |
| Zea_mayNP_001142394.1      | GSLVICERSL | TQSTGGPSGP | NTPNFIRAEM | LPSGYLIRPC | DGGGSMIYIV |
| Vit_vinREVOLUTA            | GSLVVCERSL | SGSGAGPNTA | AAAQFVRAEM | LPSGYLIRPC | EGGGSIIHIV |
| Ory_braHOX32-like          | GSLVICERSL | TQSTGGPSGP | NTPNFVRADV | LPSGYLIRPC | EGGGSMIHIV |
| Ric_comXP_002529946.1      | GSLVVCERSL | SGSGAGPNA  | AAAQFVRAEM | LPSGYLIRPC | DGGGSIIHIV |
| Tha_cacXP_007016749.1      | GSLVVCERSL | SGSGAGPSAA | AAAQFVRAEM | LPSGYLIRPC | EGGGSIIHIV |
| Fra_vesREVOLUTA-like       | GSFVVCERSL | SGSGAGPSGA | SAAQFVRAEM | LPSGYLIRPC | EGGGSIIHIV |
| Zea_mayNP_001146215.1      | GSLVICERSL | THSTGGPSGP | KTPDFIRAEM | LPSGYLIRPC | DGGGSMIYIV |
| The_cacXP_007012152.1      | GSLVVCERSL | NNTQNGPSIP | PAANFVRAEM | LPSGYLIRPC | EGGGSIIHIV |
| Pru_perppa001386mg         | GSLVVCERSL | NNTQNGPSMP | PVQNFVRAEM | LPSGYLIRPC | EGGGSIIHIV |
| Pop_triAAX19057.1          | GSLVVCERSL | NNTQNGPSMP | PTQHFVRAEM | LPSGYLIRPC | EGGGSIIHVV |
| Pop_triXP_002309538.2      | GSLVVCERSL | NNTQNGPSMP | PTQHFVRAEM | LPSGYLIRPC | EGGGSIIHVV |
| Fra_vesATHB-8-like         | GSLVVCERSL | NNTQNGPSMP | PVQNFVRAEM | LPSGYLIRPC | EGGGSIIHIV |
| Pop_triXP_002324794.1      | GSLVVCERSL | NNTQNGPSMP | PTQHFVRAEM | LPSGYLIRPC | EGGGSIIHIV |
| Vit_vin009744              | GSLVVCERSL | NNTQNGPSMP | PVQYFVRAEK | LPSGYLIRPC | EGGGSIIHIV |
| Gly_maxATHB-8-like         | GSLVVCERSL | NNTQNGPAMP | PVQHFVRADM | LASGYLIRPC | EGGGSIIHIV |
| Sol_lycATHB-15-like        | GSLVICERSL | NNTQNGPSMP | PVQSFVRADI | LPSGYLIRPC | EGGGSIIHIV |
| Gly_maxATHB-8-likeb        | GSFVVCERSL | NNTQNGPAMP | PVQHFVRADM | LPSGYLIRPC | EGGGSIIHIV |
| Med_truXP_003603630.1      | GSLVVCERSL | NNTQNGPSMP | PVPHFVRAEV | LPSGYLIRPC | EGGGSIIHIV |



|                            |            |            |            |             |             |
|----------------------------|------------|------------|------------|-------------|-------------|
| AmTr_v1.0_scaffold00148.15 | DHLNLEAWSV | PEVLRPLYES | SKVLAQKMTI | AALRHIRQIA  | QEMSGEV--V  |
| AmTr_v1.0_scaffold00056.60 | DHMDLEPWSV | PEVLRPLYES | STVLAQKMTM | AALRHRLRQIA | QEVSQNT--V  |
| AmTr_v1.0_scaffold00155.45 | DHVDLEAWN  | PEVLRPLYES | SKILAQKMTL | AALRHIRQIA  | HEASGEV--N  |
| Ara_thaPHABULOSA           | DHVDLDAWSV | PEVLRPLYES | SKILAQKMTV | AALRHVRQIA  | QETSQGEV--Q |
| Ara_thaATHB15              | DHMDLEACSV | PEVLRPLYES | PKVLAQKTTM | AALRQLKQIA  | QEVTQTNSSV  |
| Ara-thaPHAVOLUTA           | DHVDLDVSSV | PEVLRPLYES | SKILAQKMTV | AALRHVRQIA  | QETSQGEV--Q |
| Ara_thaATHB8               | DHFDLEPWSV | PEVLRSLYES | STLLAQRTTM | AALRYLRQIS  | QEISQPN--V  |
| Ara_thaREVOLUTA            | DHLNLEAWSV | PDVLRPLYES | SKVVAQKMTI | AALRYIRQLA  | QESNGEV--V  |
| Vit_vinHOX32-like          | DHVDLDAWSV | PEVLRPLYES | SKILAQKTTV | AALRHIRQIA  | QETSQGEI--Q |
| The_cacXP_007022870.1      | DHVDLDVWSV | PEVLRPLYES | SKILAQKMTI | AALRHIRQIA  | QETSQGEI--Q |
| Ory_satHOX32               | DHVDLDAWSV | PEVLRPLYES | PKILAQKMTI | AALRHIRQIA  | HESSGEM--P  |
| Pru_perppa001343mg         | DHVDLDAWSV | PEVLRSLYES | SKILAQKMTI | SALRHIRQIA  | QETSQGEI--Q |
| Bra_disHOX32-like          | DHVDLDAWSV | PEVLRPLYES | PKILAQKMTI | AALRHIRQIA  | HESSGEM--P  |
| Pop_tripHABULOSA           | DHVDLDVWSV | PEVLRPLYES | SKILAQKMTM | AALRHIRQIA  | QETSQGEI--Q |
| Pop_tripHABULOSAb          | DHVDLDVWSV | PEVLRPLYES | SKILAQKMTM | AALRYIRQIA  | QETSQGEI--Q |
| Fra_vesHOX32-like          | DHVDLDAWSV | PEVLRSLYES | SKIIAQKMTV | AALRHIRQIA  | QEATQGEI--Q |
| Gly_maxATHB-14-like        | DHIDLDVWSV | PEVLRPLYES | SKILAQKLT  | AALOHIRQIA  | LESSQGEI--Q |
| Gly_maxREVOLUTA-like       | DHLNLEAWSV | PEVLRPLYES | SKVVAQKMTI | AALRYIRQIA  | QETSQGEV--V |
| Gly_maxREVOLUTA-likeb      | DHLNLEAWSV | PEVLRPLYES | SKVVAQKMTI | AALRYIRQIA  | QETSQGEV--V |
| Pru_perREV IFL1            | DHLNLEAWSV | PEVLRPLYES | SKVVAQKMTI | AALRYIRQIA  | QETSQGEV--V |
| Ory_satHOX33               | DHVDLDAWSV | PEVLRPLYES | PKILAQKMTI | AALRHIRQIA  | HESSQGEI--P |
| Sol_tubATHB-14-like        | DHIDLDAWSV | PEVLRPLYES | SKILAQKMTM | AALRHIRQIA  | QETSQGEI--Q |
| The_cacXP_007022872.1      | DHVDLDVWSV | PEVLRPLYES | SKILAQKMTI | AALRHIRQIA  | QETSQGEI--Q |
| Ory_satHOX33-like          | DHVDLDAWSV | PEVLRPLYES | PKILAQKMTI | AALRHIRQIA  | HESSQGEI--P |
| Sol_lycREVOLUTA-like       | DHLNLEAWSA | PEILRPLYES | SKVVAQKMTI | AALRYARQLA  | QETSQGEV--V |
| Sol_lycHOX32-like          | DHIDLDAWSV | PEVLRPLYES | SKILAQKTTM | AALRHIRQIA  | QETSQGEI--Q |
| Gly_maxATHB-14-likeb       | DHVDLDVWSV | PEVLRPLYES | PKFLAQKLT  | AALRNVRQIA  | QESSQGEV--Q |
| Pop_tripX_006378973.1      | DHLNLAQWSV | PEVLRPLYES | SKAVAQKVTI | TALRHVRQIA  | HETSQGEV--V |
| Ory_satACA64837.1          | DHVDLDAWSV | PEVLRPLYES | PKILAQKMTI | AALRHIRQIA  | HESSQGEI--P |
| Vit_vin013992              | DHLNLEAWSV | PEVLRPLYES | SRVVAQKMTI | AALRYIRQIA  | QETSQGEV--V |
| Ory_satOsJ_11861           | DHVDLDAWSV | PEVLRPLYES | PKILAQKMTI | AALRHIRQIA  | HESSGEM--P  |
| Sol_tubREVOLUTA-like       | DHLNLEAWSA | PEILRPLYES | SKVVAQKMTI | AALRYARQLA  | QETSQGEV--V |
| Gly_maxATHB-14-likec       | DHVDLDVWSV | PEVLRPLYES | PKFLAQKLT  | AALRHARQIA  | QESSQGDV--H |
| The_cacXP_007024277.1      | DHMDLEPWRV | PEVLRPLYES | STVLAQKTTM | AALRQLRQIA  | QEVSQSN--V  |
| Vit_vinATHB-15-like        | DHMDLEPWSV | PEVLRPLYES | STVLAQKTTM | AALRQLRQIA  | QEVSQSN--V  |
| Ric_comXP_002515977.1      | DHMDLEPWSV | PEVLRPLYES | STVLAQKTTM | AALRHRLRQIA | QEASQSN--V  |
| The_cacXP_007016751.1      | DHMNLEAWSV | PEVLRPLYES | SKVIAQKMTI | AALRYIRQIA  | QETSQGEV--V |
| Sol_tubHOX32-like          | DHIDLDAWSV | PEVLRPLYES | SKILAQKTTM | AALRHIRQIA  | QETSQGEI--Q |
| Sol_lycATHB-14-like        | DHIDLDACSV | PEVLRPLYES | SKILAQKLT  | AAFRYIRQIA  | QETSQGEI--Q |
| Sol_tubATHB-14-like_X1     | DHIDLDACSV | PEVLRPLYES | SKILAQKMTM | AAFRYIRQIA  | QETSQGEI--Q |
| Med_truATHB-14             | DHVDLDVWSV | PEVLRPLYES | SKILAQKLT  | AALOHIKQIA  | QESSQGEI--Q |
| Zea_mayNP_001142394.1      | DHVNLAQWSV | PEVLRPLYES | PKILAQKMTA | AALRHIRQIA  | HESSQGEI--P |
| Vit_vinREVOLUTA            | DHLNLEAWSV | PEVLRPLYES | SRVVAQKMTI | AALRYIRQIA  | QETSQGEV--V |
| Ory_braHOX32-like          | DHVDLDAWSV | PEVLRPLYES | PKILAQKMTI | AALRHIRQIA  | HESSGEM--P  |
| Ric_comXP_002529946.1      | DHLNLEAWSV | PEVLRPLYES | SKVVAQKMTI | AALRFIRQIA  | QETSQGEV--V |
| Tha_cacXP_007016749.1      | DHMNLEAWSV | PEVLRPLYES | SKVIAQKMTI | AALRYIRQIA  | QETSQGEV--V |
| Fra_vesREVOLUTA-like       | DHLNLEAWSV | PEVLRPLYES | SKVVAQKRTI | AALRYIRQIA  | QETSQGEV--V |
| Zea_mayNP_001146215.1      | DHVDLNACSV | PEVLRPLYES | PKILAQKMTA | AALRHIRQIA  | HESSQGEI--P |
| The_cacXP_007012152.1      | DHMDLEPWSV | PEVLRPLYES | STLLAQKTTM | AALRHRLRQIS | QEISQPN--V  |
| Pru_perppa001386mg         | DHMDLEPWSV | PEVLRPLYES | STLLAQKTTM | AALRNLRQIS  | QEVSQPN--A  |
| Pop_triAAX19057.1          | DHMDLEPWSV | PEVLRPLYES | STLLAQKTTM | AALRHRLRQIS | QEVSQPN--V  |
| Pop_triXP_002309538.2      | DHMDLEPWSV | PEVLRPLYES | STLLAQKTTM | AALRHRLRQIS | QEVSQPN--V  |
| Fra_vesATHB-8-like         | DHMDLEPWNV | PEVLRPLYES | STLLAQKTTM | AALRNLRQIS  | QEVSQPN--T  |
| Pop_triXP_002324794.1      | DHMDLEPWSV | PEVLRPLYES | STLLAQKTTM | AALRHRLRQIS | QEISQPN--V  |
| Vit_vin009744              | DHMDLEPWSV | PEVLRPLYES | STLLAQKTTM | AALRHRLRQIS | QEVSQPN--N  |
| Gly_maxATHB-8-like         | DHMDLEPWSV | PEVLRPLYES | SMLLAQRTTM | AALRHRLRQIS | QEVSQPT--V  |
| Sol_lycATHB-15-like        | DHMDLEPWSV | PEVLRPLYES | STLLSQRTTM | AALRHRLRQIS | QEISHPT--V  |
| Gly_maxATHB-8-likeb        | DHMDLEPWSV | PEVLRPLYES | SMLLAQRTTM | AALRHRLRQIS | QEVSQPS--V  |
| Med_truXP_003603630.1      | DHMDLEPWSV | PEVLRPLYES | SMLLAQRTTM | AALRHRLRQIS | QEVSQPS--V  |

|                            |             |            |             |             |            |
|----------------------------|-------------|------------|-------------|-------------|------------|
| AmTr_v1.0_scaffold00148.15 | FGWGRQPAVL  | RTFSQRLSRG | FNDVAVNGFAD | DGWS-LMSSD  | GVEDVSVVIN |
| AmTr_v1.0_scaffold00056.60 | VGWGRQPAAL  | RALSQRLSKG | FNEALNGFTD  | DGWS-LLGND  | GMDDVTILVN |
| AmTr_v1.0_scaffold00155.45 | YGGGRQPAVL  | RTFSQRLSRG | FNDVAVNGFAD | DGWS-LMSSD  | GVEDVTIVLN |
| Ara_thaPHABULOSA           | YGGGRQPAVL  | RTFSQRLCRG | FNDVAVNGFVD | DGWS-PMGSD  | GAEDVTVMIN |
| Ara_thaATHB15              | NGWGRRPAAL  | RALSQRLSRG | FNEAVNGFTD  | EGWS-VIG-D  | SMDDVTITVN |
| Ara-thaPHAVOLUTA           | YSGGRQPAVL  | RTFSQRLCRG | FNDVAVNGFVD | DGWS-PMSSD  | GGEDITIMIN |
| Ara_thaATHB8               | TGWGRRPAAL  | RALSQRLSKG | FNEAVNGFSD  | EGWS-ILLES  | GIDDVTLVLN |
| Ara_thaREVOLUTA            | YGLGRQPAVL  | RTFSQRLSRG | FNDVAVNGFGD | DGWS-TMHCD  | GAEDIIVAIN |
| Vit_vinHOX32-like          | YGGGRQPAVL  | RTFSQRLCRG | FNDVAVNGFAD | DGWS-LMGSD  | GVEDVTIVIN |
| The_cacXP_007022870.1      | YGGGRQPAVL  | RTFSQRLCRG | FNDVAVNGFAD | DGWS-LMGSD  | GVEDVTIMIN |
| Ory_sathOX32               | YGGGRQPAVL  | RTFSQRLSRG | FNDVAVNGFPD | DGWS-LMSSD  | GAEDVTIAFN |
| Pru_perppa001343mg         | YGGGRQPAVL  | RTFCQRLCRG | FNDVAVNGFAD | DGWS-LMGSD  | GVEDVTITIN |
| Bra_dishOX32-like          | YGGGRQPAVL  | RTFSQRLSRG | FNDVAVNGFLD | DGWS-LMSSD  | GAEDVTIAIN |
| Pop_tripHABULOSA           | YGGGRQPAVL  | RTFSQRLCRG | FNDVAVNGFTD | DGWS-LLGSD  | GGDDVTIVIN |
| Pop_tripHABULOSAb          | YGGGRQPAVL  | RTFSQRLCRG | FNDVAVNGFTD | SGWS-LLDGD  | GGDDVTIVIN |
| Fra_vesHOX32-like          | YAGGRQPAVL  | RTFSQRLCRG | FNDVAVNGFAD | DGWS-LLGSD  | GAEDVTIAIN |
| Gly_maxATHB-14-like        | YGGGRQPAVL  | RTFSQRLCRG | FNDVAVNGFVD | DGWS-LMGTD  | GVEDVTIAIN |
| Gly_maxREVOLUTA-like       | YGLGRQPAVL  | RTFSQRLSRG | FNDVAVNGFND | DGWT-VLNCD  | GAEDVIAVN  |
| Gly_maxREVOLUTA-likeb      | YGLGRQPAVL  | RTFSQRLSRG | FNDVAVNGFND | DGWT-VLNCD  | GAEDVFIIVN |
| Pru_perREV_IFL1            | YSLGRQPAVL  | RTFSQRLIRG | FNDVAVNGFND | DGWS-LINCD  | GAEDVIAVN  |
| Ory_sathOX33               | YGAGROPVAVF | RTFSQRLSRG | FNDVAVSGFPD | DGWS-LLSSD  | GSEDITISVN |
| Sol_tubATHB-14-like        | YTGGROPVAVL | RALSQRLCRG | FNDVAVSGFVD | DGWT-IMDSD  | GVEDVTIAIN |
| The_cacXP_007022872.1      | YGGGRQPAVL  | RTFSQRLCRG | FNDVAVNGFAD | DGWS-LMGSD  | GVEDVTIMIN |
| Ory_sathOX33-like          | YGAGROPVAVF | RTFSQRLSRG | FNDVAVSGFPD | DGWS-LLSSD  | GSEDITISVN |
| Sol_lycREVOLUTA-like       | YGLGRQPAVL  | RTFSQRLCRG | FNDVAVNGFGD | DGWS-MLSSD  | GAEDVIVAVN |
| Sol_lycHOX32-like          | YSGGRQPAVL  | RALSQRLCRG | FNDVAVNGFVD | DGWT-ITDSD  | GVEDVTIAIN |
| Gly_maxATHB-14-likeb       | YGGGRQPAVL  | RTFSQRLCKG | FNDVAVNGFVD | DGWS-LMGN   | GVEDVTIGIN |
| Pop_triXP_006378973.1      | YGLGRQPAVL  | RTFSQRLSRG | FNDVAVNGFND | DGWS-LMNSD  | GAEDVIAVN  |
| Ory_satACA64837.1          | YGAGROPVAVF | RTFSQRLSRG | FNDVAVSGFPD | DGWS-LLSSD  | GSEDITISVN |
| Vit_vin013992              | YGLGRQPAVL  | RTFSQRLSRG | FNDVAVNGFND | DGWS-LMSCD  | GAEDVIAVN  |
| Ory_satOsJ_11861           | YGGGRQPAVL  | RTFSQRLSRG | FNDVAVNGFPD | DGWS-LMSSD  | GAEDVTIAFN |
| Sol_tubREVOLUTA-like       | YGLGRQPAVL  | RTFSQRLCRG | FNDVAVNGFGD | DGWS-MLSSD  | GAEDVIVAVN |
| Gly_maxATHB-14-likec       | YGGGRQPAVL  | RTFSQRLCKG | FNDVAVNGFVD | DGWS-LMGN   | GVEDVTIAIN |
| The_cacXP_007024277.1      | TGWGRRPAAL  | RALSQRLSRG | FNEALNGFTD  | EGWS-MMGND  | GMDDVTILVN |
| Vit_vinATHB-15-like        | TGWGRRPAAL  | RALSQRLSRG | FNEALNGFTD  | EGWS-MMGND  | GIDDVTLVLN |
| Ric_comXP_002515977.1      | TNWGRRPAAL  | RALSQRLSRG | FNEALNGFTD  | EGWS-MMGND  | GMDDVTILVN |
| The_cacXP_007016751.1      | YGLGRQPAVL  | RTFSQRLSRG | FNDVAVNGFND | DGWS-IMNCD  | GAEDVIAIN  |
| Sol_tubHOX32-like          | YSGGRQPAVL  | RALSQRLCRG | FNDVAVNGFVD | DGWT-ITDSD  | GVEDVTIAIN |
| Sol_lycATHB-14-like        | YAGGRQPAVL  | RAFSQRLCRG | FNNVAVSGFID | DGWT-IMGSD  | GVEDVTIIVN |
| Sol_tubATHB-14-like_X1     | YAGGRQPAVL  | RAFSQRLCRG | FNNVAVSGFID | DGWT-IMGSD  | GVEDVTIIVN |
| Med_truATHB-14             | YGGGRQPAVL  | RTFSQRLCRG | FNDVAVNGFVD | DGWS-LLGND  | GVEDVTIIVN |
| Zea_mayNP_001142394.1      | YGAGROPVAVL | RTFSQRLSRG | FNDVAVSGFPD | DGWS-CLLNTD | GAEDITVTIN |
| Vit_vinREVOLUTA            | YGLGRQPAVL  | RTFSQRLSRG | FNDVAVNGFND | DGWS-LMSCD  | GAEDVIAVN  |
| Ory_braHOX32-like          | YGGGRQPAVL  | RTFSQRLSRG | FNDVAVNGFPD | DGWS-PMSSD  | GAEDVTIAFN |
| Ric_comXP_002529946.1      | YGLGRQPAVL  | RTFSQRLSRG | FNDVAVNGFND | DGWS-LMSCD  | GAEDVIVTIN |
| Tha_cacXP_007016749.1      | YGLGRQPAVL  | RTFSQRLSRG | FNDVAVNGFND | DGWS-IMNCD  | GAEDVIAIN  |
| Fra_vesREVOLUTA-like       | YSLGRQPAVL  | RTFSQRLIRG | FNDVAVNGFND | DGWS-LINCD  | GAEDIMAVN  |
| Zea_mayNP_001146215.1      | YGAGROPVAVL | RTFSQRLSRG | FNDVAVSGFPD | DGWS-LLSSD  | GAEDISITIN |
| The_cacXP_007012152.1      | TGWGRRPAAL  | RALSQRLSKG | FNEAVNGFTD  | EGWS-MLES   | GVEDVTLLVN |
| Pru_perppa001386mg         | AGWGRRPAAL  | RALSQRLSKG | FNEAVNGFTD  | EGWS-ILES   | GVEDVTLLVN |
| Pop_triAAX19057.1          | TGWGRRPAAL  | RALSQRLSKG | FNEAVNGFAD  | EGWS-MLES   | GIDDVTVLVN |
| Pop_triXP_002309538.2      | TGWGRRPAAL  | RALSQRLSKG | FNEAVNGFAD  | EGWS-MLES   | GIDDVTVLVN |
| Fra_vesATHB-8-like         | NGWGRRPAAL  | RALSQRLSKG | FNEAVNGFTD  | EGWS-ILES   | GVEDVTLLVN |
| Pop_triXP_002324794.1      | TGWGRRPAAL  | RALSQRLSKG | FNEAVNGFAD  | EGWS-LLES   | GIDDVTVLVN |
| Vit_vin009744              | TGWGRRPAAL  | RALGQRLTKG | FNEAVNGFTD  | EGWS-MMES   | GIDDVTVLVN |
| Gly_maxATHB-8-like         | TGWGRRPAAL  | RALSQRLSKG | FNEAVNGFAD  | DGWS-MLES   | GIDDVTVLVN |
| Sol_lycATHB-15-like        | SGWGRRPAAL  | RALGQRLSKG | FNEAVNGFTD  | EGWS-MLES   | GVEDVTLLVN |
| Gly_maxATHB-8-likeb        | TGWGRRPAAL  | RALSQRLSKG | FNEAVNGFAD  | DGWS-MLES   | GIDDVTVLVN |
| Med_truXP_003603630.1      | TGWGRRPAAL  | RALSQRLSKG | FNEAVNGFTD  | DGWS-MLDSD  | GIDDVTVLVN |

|                            |            |             |            |      |                 |
|----------------------------|------------|-------------|------------|------|-----------------|
| AmTr_v1.0_scaffold00148.15 | TSPNKHVG-- | -----       | MSGGILCAKS | SMLL | -----           |
| AmTr_v1.0_scaffold00056.60 | SSPAKIMAAN | LTS-TNGFPT  | VCGAVLCAKA | SMLL | -----           |
| AmTr_v1.0_scaffold00155.45 | TNPSKLFAN  | VNS-AAAIST  | FGGGILCAKA | SMLL | -----           |
| Ara_thaPHABULOSA           | LSPGKFGGSQ | YGN--SFLPS  | FGSGVLCACA | SMLL | -----           |
| Ara_thaATHB15              | SSPDKLMGLN | LTF-ANGFAP  | VSNVVLCAKA | SMLL | -----           |
| Ara-thaPHAVOLUTA           | SSSAKFAGSQ | YGS--SFLPS  | FGSGVLCACA | SMLL | -----           |
| Ara_thaATHB8               | SSPTKMMMTS | SLPFANGYTS  | MPSAVLCAKA | SMLL | -----           |
| Ara_thaREVOLUTA            | STK-----H  | LNNISNSLSF  | L-GGVLCAKA | SMLL | -----           |
| Vit_vinHOX32-like          | SSPSKFLGPQ | YNS--TMFPT  | FGGGVLCACA | SMLL | -----           |
| The_cacXP_007022870.1      | SSPGKFLGSQ | YNT--SMFPS  | FGGGVLCACA | SMLL | -----           |
| Ory_satHOX32               | SSPNKLVGSH | VNS-SQLFSA  | IGGGILCAKA | SMLL | -----           |
| Pru_perppa001343mg         | SSPNKFLGSQ | YNA--SIFPT  | FGGGVLCACA | SMLL | -----           |
| Bra_disHOX32-like          | SSPNKLVGSH | VNS-SQLFSA  | IGGGILCAKA | SMLL | -----           |
| Pop_triPHABULOSA           | SSPNKFLGSQ | YNA--SMFPT  | FGGGVLCACA | SMLL | -----           |
| Pop_triPHABULOSAb          | SSPTKFLGSQ | YNA--SISPT  | F-GGVLCAKA | SMLL | -----           |
| Fra_vesHOX32-like          | SSPNKFLGSQ | YNT--SIFPS  | FGGGVLCACA | SMLL | -----           |
| Gly_maxATHB-14-like        | SSPNKFLGSN | YNA--SMFPA  | FGGGVLCACA | SMLL | -----           |
| Gly_maxREVOLUTA-like       | STKN--LSGT | SNP-ASSLTF  | L-GGILCAKA | SMLL | -----           |
| Gly_maxREVOLUTA-likeb      | STKN--LSGT | SNP-ASSLTF  | L-GGILCAKA | SMLL | -----           |
| Pru_perREV IFL1            | STKN--L-TT | SNP-ANSLAL  | IGGGVLCACA | SMLL | -----           |
| Ory_satHOX33               | SSPNKLVGSH | VSP-NPLFST  | VGGGILCAKA | SMLL | -----           |
| Sol_tubATHB-14-like        | SSSSKFLGSQ | YNT-LSILPT  | F-GGVLCAKA | SMLL | -----           |
| The_cacXP_007022872.1      | SSPGKFLGSQ | YNT--SMFPS  | FGGGVLCACA | SMLL | -----           |
| Ory_satHOX33-like          | SSPNKLVGSH | VSP-NPLFST  | VGGGILCAKA | SMLL | -----           |
| Sol_lycREVOLUTA-like       | SRKN--LATT | SIP---LSP   | L-GGVLCAKA | SMLL | -----           |
| Sol_lycHOX32-like          | SSSSKFLGSQ | YNT-LSILPT  | F-GGVLCAKA | SMLL | -----           |
| Gly_maxATHB-14-likeb       | SSPNKFFSSH | YNT--SMLPA  | FGGGVLCACA | SMLL | -----           |
| Pop_triXP_006378973.1      | TTKN--LISA | NNP-AHLSLF  | L-GGILCAKA | SMLL | -----           |
| Ory_satACA64837.1          | SSPNKLVGSH | VSP-NPLFST  | VGGGILCAKA | SMLL | -----           |
| Vit_vin013992              | STKN--LNTT | SNP-ANSL-S  | LPGGVLCACA | SMLL | -----           |
| Ory_satOsJ_11861           | SSPNKLVGSH | VNS-SQLFSA  | IGGGILCAKA | SMLL | -----           |
| Sol_tubREVOLUTA-like       | SRKN--LATT | SVP---LSS   | L-GGILCAKA | SMLL | -----           |
| Gly_maxATHB-14-likec       | SSPNKFFGSH | YNT--SMLPA  | FGGGVLCACA | SMLL | -----           |
| The_cacXP_007024277.1      | SSPDKLMGLN | LSF-ANGFPA  | VSNVVLCAKA | SMLL | -----           |
| Vit_vinATHB-15-like        | SSPEKLTGLN | LSF-ANGFPA  | VSNVVLCAKA | SMLL | QVSFIS CSDVLFTH |
| Ric_comXP_002515977.1      | SSPEKLMGLN | LSF-SNGFPA  | VSNVVLCAKA | SMLL | -----           |
| The_cacXP_007016751.1      | SSKN--LSSS | SNP-ANALSF  | L-GGVLCAKA | SMLL | -----           |
| Sol_tubHOX32-like          | SSSSKFLGSQ | YNT-LSILPT  | F-GGVLCAKA | SMLL | -----           |
| Sol_lycATHB-14-like        | SSPSKFLDAQ | YNT-LSILPT  | F-GGVLCAKA | SMLL | -----           |
| Sol_tubATHB-14-like_X1     | SSPSKFLDAQ | YNT-LSILPT  | F-GGVLCAKA | SMLL | -----           |
| Med_truATHB-14             | SSPNKFLGSN | YSS--MFPT   | FGGGVLCACA | SMLL | -----           |
| Zea_mayNP_001142394.1      | SSPNKLVGSH | VSA-SPLFSA  | MGGGIMCAKA | SMLL | -----           |
| Vit_vinREVOLUTA            | STKN--LNTT | SNP-ANSL-S  | LPGGVLCACA | SMLL | -----           |
| Ory_braHOX32-like          | SSPNKLVGSH | VNS-SQLFSA  | IGGGILCAKA | SMLL | -----           |
| Ric_comXP_002529946.1      | STKN--LSST | SNA-ANSFAF  | L-GGILCAKA | SMLL | -----           |
| Tha_cacXP_007016749.1      | SSKN--LSSS | SNP-ANALSF  | L-GGVLCAKA | SMLL | -----           |
| Fra_vesREVOLUTA-like       | STKN--L-TT | TNP-ANSFAF  | L-GGILCAKA | SMLL | -----           |
| Zea_mayNP_001146215.1      | SSPNKLIGSD | VSP-SPFFSA  | MGGGIMCAKA | SMLL | -----           |
| The_cacXP_007012152.1      | SSPGKMMGAN | LSY-SNGFPS  | MSNAVLCAKA | SMLL | -----           |
| Pru_perppa001386mg         | SSPGKMMGAN | LYA--NGVPS  | MSNAVLCAKA | SMLL | -----           |
| Pop_triAAX19057.1          | SSPAKMMGVN | FSY-ANGFPS  | MSNAVLCAKA | SMLL | -----           |
| Pop_triXP_002309538.2      | SSPAKMMGVN | FSY-ANGFPS  | MSNAVLCAKA | SMLL | -----           |
| Fra_vesATHB-8-like         | SSPGKMMGAN | LYA--NGVPS  | MSNAVLCAKA | SMLL | -----           |
| Pop_triXP_002324794.1      | SSPTKTMGVN | FSY-DNGFPS  | MNAVLCAKA  | SMLL | -----           |
| Vit_vin009744              | SSPAKMMGVN | LSY-ASGFPS  | MSNAVLCAKA | SMLL | -----           |
| Gly_maxATHB-8-like         | SSPSKMMGVN | LGYNNGFPS   | VSSLLCAKA  | SMLL | -----           |
| Sol_lycATHB-15-like        | SSPSKLMGAN | ISY-ANGFPS  | MSSAVLCAKA | SMLL | -----           |
| Gly_maxATHB-8-likeb        | SSPSKMMGVS | LVYNNMGFPS  | VSSSVLCAKA | SMLL | -----           |
| Med_truXP_003603630.1      | SSPSKMMGLN | LGY--NNGFPS | VTSSVLCACA | SMLL | -----           |

|                            |            |            |             |             |            |
|----------------------------|------------|------------|-------------|-------------|------------|
| AmTr_v1.0_scaffold00148.15 | -QNVPPALLI | RFLREHRSEW | ADSNIDAYCA  | ASLKANPFAI  | PGSGPSRFTG |
| AmTr_v1.0_scaffold00056.60 | -QNVPPALLI | RFLREHRSEW | ADSNIDAYS   | AALKSNPGTL  | PTSRMGGF-G |
| AmTr_v1.0_scaffold00155.45 | -QNVPPALLV | RFLREHRSEW | ADSGVDAYAA  | SSMRTGQFVV  | PGSRTGSFPG |
| Ara_thaPHABULOSA           | -QNVPPAVLV | RFLREHRSEW | ADYGVDAYAA  | ASLRASPFVAV | PCARAGGFPS |
| Ara_thaATHB15              | -QNVPPAILL | RFLREHRSEW | ADNNIDAYLA  | AAVKVGPCS-  | --ARVGGF-G |
| Ara-thaPHAVOLUTA           | -QNVPPPLVI | RFLREHRAEW | ADYGVDAYS   | ASLRATPYAV  | PCVRTGGFPS |
| Ara_thaATHB8               | -QNVPPSILL | RFLREHRQEW | ADNSIDAYS   | AAIKAGPCSL  | PIPRPGSF-G |
| Ara_thaREVOLUTA            | -QNVPPAVLI | RFLREHRSEW | ADFNVDAYS   | ATLKAGSFAY  | PGMRPTRFTG |
| Vit_vinHOX32-like          | -QNVPPALLV | RFLREHRSEW | ADYGVDAYS   | ACLKASPYEV  | PCARPGGFPS |
| The_cacXP_007022870.1      | -QNVPPALLV | RFLREHRSEW | ADYGVDITYSA | ACLKASPYAV  | PCARPGGFPS |
| Ory_satHOX32               | -QNVPPALLV | RFLREHRSEW | ADPGVDAYS   | AALRASPYAV  | PGLRAGGFMG |
| Pru_perppa001343mg         | -QSVPPALLV | RFLREHRSEW | ADYGVDAYS   | ACLKASPYAV  | PCARPGGFPS |
| Bra_disHOX32-like          | -QNVPPALLV | RFLREHRSEW | ADPGVDAYS   | AALRASPYAV  | PGLRASGFMG |
| Pop_triPHABULOSA           | -QNVPPALLV | RFLREHRSEW | ADYGVDAYS   | ACLKASPYAV  | PCARPGGFPS |
| Pop_triPHABULOSAb          | -QNVPPALLV | RFLREHRSEW | ADYGVDVYS   | ACLKASPYAV  | PCARPGGFPS |
| Fra_vesHOX32-like          | -QSVPPALLV | RFLREHRSEW | ADYGVDAYS   | ACLKASPYAV  | PCARPGGFPS |
| Gly_maxATHB-14-like        | -QNVPPALLV | RFLREHRSEW | ADYGVDAYS   | ACLKASPYAV  | PCARPGGFPS |
| Gly_maxREVOLUTA-like       | -QNVPPAVLV | RFLREHRSEW | ADFNVDAYS   | ASLKAGTYAY  | PGMRPTRFTG |
| Gly_maxREVOLUTA-likeb      | -QNVPPAVLV | RFLREHRSEW | ADFSVDAYS   | ASLKAGTYAY  | PGMRPTRFTG |
| Pru_perREV_IFL1            | -QNVPPAVLV | RFLREHRSEW | ADFNVDAYS   | ASLKAGSYAY  | PGMRPTRFTG |
| Ory_satHOX33               | -QNVPPALLV | RFLREHRSEW | ADPGVDAYS   | ASLRASPYAV  | PGLRTSGFMG |
| Sol_tubATHB-14-like        | -QNVPPALLV | RFLREHRSEW | ADYGVDAYSS  | ASLKASPYAV  | PCARPGGFPS |
| The_cacXP_007022872.1      | -QNVPPALLV | RFLREHRSEW | ADYGVDITYSA | ACLKASPYAV  | PCARPGGFPS |
| Ory_satHOX33-like          | -QNVPPALLV | RFLREHRSEW | ADPGVDAYS   | ASLRASPYTV  | PGLRTSGFMG |
| Sol_lycREVOLUTA-like       | -QNVPPAVLV | RFLREHRSEW | ADFNVDVFA   | SALKSCPITY  | PGMRPTRFTG |
| Sol_lycHOX32-like          | -QNVPPALLV | RFLREHRSEW | ADYGVDAYSS  | ASLKASPYAV  | PCARPGGFPS |
| Gly_maxATHB-14-likeb       | -QNVPPALLV | RFLREHRSEW | ADYGVDAYSS  | ACLKASPYAV  | PCARPSGFPS |
| Pop_triXP_006378973.1      | -QNVPPAVLV | RFLREHRSEW | ADFSVDAYS   | ASLKAGSYAY  | PGMRSMRFTG |
| Ory_satACA64837.1          | -QNVPPALLV | RFLREHRSEW | ADPGVDAYS   | ASLRASPYAV  | PGLRTSGFMG |
| Vit_vin013992              | -QNVPPAVLV | RFLREHRSEW | ADFSVDAYS   | ASLKASPYSY  | PGMRPTRFTG |
| Ory_satOsJ_11861           | -QNVPPALLV | RFLREHRSEW | ADPGVDAYS   | AALRASPYAV  | PGLRAGGFMG |
| Sol_tubREVOLUTA-like       | -QNVPPAVLV | RFLREHRSEW | ADFNVDVFA   | SALKSCPITY  | PGMRPTRFTG |
| Gly_maxATHB-14-likec       | -QNVPPALLV | RFLREHRSEW | ADYEVDAYSS  | ACLKASPYAV  | PCARPSGFPS |
| The_cacXP_007024277.1      | RFLREHRSEW | ADSSIDAYS  | AAVKVGPCSL  | PGSRVGGF-G  |            |
| Vit_vinATHB-15-like        | FQNVPPAILL | RFLREHRSEW | ADNNIDAYS   | AAVKVGPCSL  | PGSRVGGF-G |
| Ric_comXP_002515977.1      | -QNVPPAILL | RFLREHRSEW | ADNNIDAYS   | AAIKVGPCTL  | PGTRIGSF-G |
| The_cacXP_007016751.1      | -QNVPPAVLV | RFLREHRSEW | ADFNVDAYS   | ASLKAGTYSY  | PGMRPTRFTG |
| Sol_tubHOX32-like          | -QNVPPALLV | RFLREHRSEW | ADYGVDAYSS  | ASLKASPYAV  | PCARPGGFPS |
| Sol_lycATHB-14-like        | -QDVCPALLV | RFLREHRSEW | ADYGVDAYSS  | ASLKASPYAV  | PCARPGVFP  |
| Sol_tubATHB-14-like_X1     | -QDVCPALLV | RFLREHRSEW | ADYGVDAYSS  | ASLKASPYAV  | PCARPGVFP  |
| Med_truATHB-14             | -QNVPPALLV | RFLREHRSEW | ADYGVDAYS   | TCLKSSPYAV  | PCPRPGGFPS |
| Zea_mayNP_001142394.1      | -QNVPPALLV | RFLREHRSEW | ADPGIDAYSV  | ASLRANPYTV  | PGLRAGGFMG |
| Vit_vinREVOLUTA            | -QNVPPAVLV | RFLREHRSEW | ADFSVDAYS   | ASLKASPYSY  | PGMRPTRFTG |
| Ory_braHOX32-like          | -QNVPPALLV | RFLREHRSEW | ADPGVDAYS   | AALRASPYAV  | PGLRAGGFMG |
| Ric_comXP_002529946.1      | -QNVPPAVLV | RFLREHRSEW | ADFNVDAYS   | ASLKAGSYAF  | PGMRPTRFTG |
| Tha_cacXP_007016749.1      | -QNVPPAVLV | RFLREHRSEW | ADFNVDAYS   | ASLKAGTYSY  | PGMRPTRFTG |
| Fra_vesREVOLUTA-like       | -QNVPPAVLV | RFLREHRSEW | ADFNVDAYS   | ASLKSGSYAY  | PGMRPTRFTG |
| Zea_mayNP_001146215.1      | -QNVPPALLV | RFLREHRSEW | ADPGVDAYS   | ASLRANPYAV  | PGLRAGGFMG |
| The_cacXP_007012152.1      | -QNVPPAILL | RFLREHRSEW | ADSGIDAYS   | AAVKAGPCSL  | PVSRGGSF-G |
| Pru_perppa001386mg         | -QNVPPAILL | RFLREHRSEW | ADRSIDAYS   | AAIKPGPCGL  | LGSRAGGF-G |
| Pop_triAAX19057.1          | -QNVPPAILL | RFLREHRSEW | ADSGIDAYAA  | AAVKAGPCSL  | PMSRAGNF-G |
| Pop_triXP_002309538.2      | -QNVPPAILL | RFLREHRSEW | ADSGIDAYAA  | AAVKAGPCSL  | PMSRAGNF-G |
| Fra_vesATHB-8-like         | -QNVPPAILL | RFLREHRSEW | ADRSIDAYS   | AAIKAGPCGM  | IGSRAGSF-G |
| Pop_triXP_002324794.1      | -QNVPPAILL | RFLREHRSEW | ADNGIDAYAA  | SAIKAGPCSL  | PVSRAGNF-G |
| Vit_vin009744              | -QNVPPAILL | RFLREHRSEW | ADSSIDAYS   | AAVKAGCTL   | PVSRAGGY-G |
| Gly_maxATHB-8-like         | -QNVPPAILL | RFLREHRSEW | ADSSIDAYS   | AAIKAGPCSL  | PGARPGGF-G |
| Sol_lycATHB-15-like        | -QNVPPPILL | RFLREHRSEW | ADSGIDAYS   | AAVKAGPCSI  | PVTRTGSF-G |
| Gly_maxATHB-8-likeb        | -QNVPPAILL | RFLREHRSEW | ADSSIDAYS   | AAIKAGPCSL  | PGARSGGF-G |
| Med_truXP_003603630.1      | -QNVPPAILL | RFLREHRSEW | ADTSIDAYS   | AAIKAGPCSL  | PGARTGAF-G |

|                            |            |            |        |         |             |            |     |
|----------------------------|------------|------------|--------|---------|-------------|------------|-----|
| AmTr_v1.0_scaffold00148.15 | SQIILPLAHT | VENEE      | -----  | FVEV    | IRLEGHGFPO  | EEAVVC     | RDL |
| AmTr_v1.0_scaffold00056.60 | GQVILPLAHT | VEHEE      | -----  | FLEV    | IKLENHGLVQ  | DDSIIP     | RDM |
| AmTr_v1.0_scaffold00155.45 | SQVILPLAQT | VEHEE      | -----  | FLEV    | IRLEGHGFSQ  | DDAVLP     | RDM |
| Ara_thaPHABULOSA           | NQVILPLAQT | VEHEE      | -----  | SLEV    | VRLEGHAYSP  | EDMGLA     | RDM |
| Ara_thaATHB15              | GQVILPLAHT | IEHEE      | -----  | FMEV    | IKLEGLGHSP  | EDAIVP     | RDI |
| Ara-thaPHAVOLUTA           | NQVILPLAQT | LEHEE      | -----  | FLEV    | VRLEGGHAYSP | EDMGLS     | RDM |
| Ara_thaATHB8               | GQVILPLAHT | IENEE      | -----  | FMEV    | IKLESGLGHYQ | EDMMMP     | ADI |
| Ara_thaREVOLUTA            | SQIIMPLGHT | IEHEE      | -----  | MLEV    | VRLEGHSLAQ  | EDAFMS     | RDV |
| Vit_vinHOX32-like          | SQVILPLAHT | VEHEE      | -----  | FLEV    | VRLEGHAFSP  | EDVALT     | RDM |
| The_cacXP_007022870.1      | SQVILPLAHT | VEHEE      | -----  | FLEV    | VRLEGHAFTP  | EDVALA     | RDM |
| Ory_satHOX32               | SQVILPLAHT | LEHEE      | -----  | FLEV    | IRLEGHSLCH  | DEVVLS     | RDM |
| Pru_perppa001343mg         | SQVILPLAQT | VENEE      | -----  | FLEV    | VRLEGHAFSP  | EDVALA     | RDM |
| Bra_disHOX32-like          | SQVILPLAHT | LEHEE      | -----  | FLEV    | IRLEGHSLCH  | DEVVLS     | RDM |
| Pop_triPHABULOSA           | SQVILPLAHT | MEHEE      | -----  | FLEV    | VRLEGHAFSP  | EDVALA     | RDM |
| Pop_triPHABULOSAb          | SQVILPLAHT | VEHEE      | -----  | FLEV    | VRLEGHAFSP  | EDVALA     | QDM |
| Fra_vesHOX32-like          | SQVILPLAHT | VENEE      | -----  | FLEV    | VRLEGHAFSP  | EDVALA     | RDM |
| Gly_maxATHB-14-like        | TQVILPLAHT | IEHEE      | -----  | FLEV    | VRIEGHAFSP  | EDVAMA     | RDM |
| Gly_maxREVOLUTA-like       | SQIIMPLGHT | IEHEE      | -----  | MLEV    | IRLEGHSLAQ  | EDAFVS     | RDI |
| Gly_maxREVOLUTA-likeb      | SQIIMPLGHT | IEHEE      | -----  | MLEV    | IRLEGHSLAQ  | EDAFVS     | RDI |
| Pru_perREV_IFL1            | GQIIMPLGHT | IEHEE      | -----  | LLEV    | VRLEGHSLTQ  | EDAFAS     | RDI |
| Ory_satHOX33               | SQVILPLAHT | LEHEE      | -----  | FLEV    | IRLEGHGFSH  | DEVLLS     | RDM |
| Sol_tubATHB-14-like        | SQVILPLAQT | VEHEE      | -----  | FLEV    | VRLEGPAPSP  | EDIALS     | RDM |
| The_cacXP_007022872.1      | SQVILPLAHT | VEHEE      | -----  | FLEV    | VRLEGHAFTP  | EDVALA     | RDM |
| Ory_satHOX33-like          | SQVILPLAHT | LEHEE      | -----  | FLEV    | IRLEGHGFSH  | DEVLLS     | RDM |
| Sol_lycREVOLUTA-like       | SQIIMPLGHT | IEHEE      | -----  | MLEV    | IRLEGHSIGQ  | EDAFMP     | RDI |
| Sol_lycHOX32-like          | SQVILPLAQT | VEHEE      | -----  | FLEV    | VRLEGPAPSP  | EDIALS     | RDM |
| Gly_maxATHB-14-likeb       | SHVIIPLAHT | IEHEE      | -----  | FLEV    | VRIEGNAFPP  | DDVALA     | CDM |
| Pop_triXP_006378973.1      | SQIIMPLGHT | IEQEE      | -----  | LLEV    | IRLEGHSAFQ  | EDAFVS     | RDI |
| Ory_satACA64837.1          | SQVILPLAHT | LEHEE      | -----  | FLEV    | IRLEGHGFSH  | DEVLLS     | RDM |
| Vit_vin013992              | SQIIMPLGHT | IEHEE      | -----  | LLEV    | IRLEGHSLAH  | EDAFMS     | RDI |
| Ory_satOsJ_11861           | SQVILPLAHT | LEHEE      | -----  | FLEV    | IRLEGHSLCH  | DEVVLS     | RDM |
| Sol_tubREVOLUTA-like       | SQIIMPLGHT | IEHEE      | -----  | MLEV    | IRLEGHSIGQ  | EDAFMP     | RDI |
| Gly_maxATHB-14-likec       | SHVIIPLAHT | IEHEE      | -----  | FLEV    | VRIEGNAFPP  | DDVAWA     | CDM |
| The_cacXP_007024277.1      | GQVILPLAHT | IEHEE      | -----  | FLEV    | IKLEGVHSP   | EDAIMP     | RDV |
| Vit_vinATHB-15-like        | SQVILPLAHT | IEHEE      | -----  | FLEV    | IKLEGVGHCP  | EDAMMP     | RDM |
| Ric_comXP_002515977.1      | GQVILPLAHT | IEHEE      | -----  | FLEV    | IKLEGGHSP   | EDPIMP     | RDM |
| The_cacXP_007016751.1      | SQIIMPLGHT | IEHEE      | -----  | LLEV    | IRLEGHSLAQ  | EDAFLS     | RDI |
| Sol_tubHOX32-like          | SQVILPLAQT | VEHEE      | -----  | FLEV    | VRLEGPAPSP  | EDIALS     | RDM |
| Sol_lycATHB-14-like        | SQVILPLAQT | VEHEE      | -----  | FLEV    | VRLEGHAFSP  | EDIALS     | RDM |
| Sol_tubATHB-14-like_X1     | SQVILPLAQT | VEHEE      | -----  | FLEV    | VRLEGHAFSP  | EDIALS     | RDM |
| Med_truATHB-14             | SQVILPLAHT | IEHEE      | -----  | FLEV    | VRIEGHAFSP  | EDVALA     | RDM |
| Zea_mayNP_001142394.1      | NQVILPLART | LEHEE      | -----  | SLEV    | IRLEGHGFSH  | EEVLMS     | RDM |
| Vit_vinREVOLUTA            | SQIIMPLGHT | IEHEE      | -----  | LLEV    | IRLEGHSLAH  | EDAFMS     | RDI |
| Ory_braHOX32-like          | SQVILPLAHT | LEHEE      | -----  | FLEV    | IRLEGHSLCH  | DEVVLS     | RDM |
| Ric_comXP_002529946.1      | SQIIMPLGHT | IEHEE      | -----  | LLEV    | IRLEGHSLVQ  | EDAFVS     | RDI |
| Tha_cacXP_007016749.1      | SQIIMPLGHT | IEHEE      | -----  | LLEV    | IRLEGHSLAQ  | EDAFLS     | RDI |
| Fra_vesREVOLUTA-like       | GQIIMPLGHT | IEQEE      | -----  | LLEV    | VRLEGHSAFQ  | EEAFAS     | RDI |
| Zea_mayNP_001146215.1      | NQVILPLART | VEHEE      | -----  | CLEV    | IRLQGHGFSH  | DEVLLS     | PDM |
| The_cacXP_007012152.1      | GQVILPLAHT | IEHEE      | -----  | FMEV    | IKLENMGHYR  | DDMIMP     | GDI |
| Pru_perppa001386mg         | DQVIHPLAHT | IEHEE      | -----  | FMEV    | IKIENMGHYR  | EDMIMPAADI |     |
| Pop_triAAX19057.1          | GQVILPLAHT | IEHEEAS    | -----  | TSMFMEV | IKLENMGY-R  | EDMLMP     | GDV |
| Pop_triXP_002309538.2      | GQVILPLAHT | IEHEEAS    | -----  | TSMFMEV | IKLENMGY-R  | EDMLMP     | GDV |
| Fra_vesATHB-8-like         | DQVILPLAHT | IEHEE      | -----  | FMEV    | IKIENMGHYR  | DDMMMPAADI |     |
| Pop_triXP_002324794.1      | GQVILPLAHT | IENEE      | -----  | AKV     | IKLENMGY-R  | EDMLMP     | GDV |
| Vit_vin009744              | GQVILPLAHT | IEHEEANLIR | FNCLQQ | FMEV    | IKLENVDHYR  | EDLMMS     | GDV |
| Gly_maxATHB-8-like         | GQVILPLAHT | IEHEE      | -----  | FMEV    | IKLENMGYYR  | DDMIMP     | GDV |
| Sol_lycATHB-15-like        | GQIILPLAHT | IEHEE      | -----  | FMEV    | IRLESIGHYQ  | DDMIMP     | SDI |
| Gly_maxATHB-8-likeb        | GQVILPLAHT | IEHEE      | -----  | FMEV    | IKLENMGYYR  | DDMSIP     | GDV |
| Med_truXP_003603630.1      | GQVILPLAHT | IEHEE      | -----  | FMEV    | IKLENMGYYR  | DDMTMP     | GDI |

|                            |             |             |            |            |            |
|----------------------------|-------------|-------------|------------|------------|------------|
| AmTr_v1.0_scaffold00148.15 | YLLQLCSGVD  | ENAVGAI SQL | VFAPIDDSFA | DDAPLLPSGF | RVIPLDSKT  |
| AmTr_v1.0_scaffold00056.60 | FLLQLCSGVD  | ENAVGACAEL  | VFAPIDPSFA | DDAPLLPSGF | RIIPLDNGV  |
| AmTr_v1.0_scaffold00155.45 | FLLQLCSGVD  | ENAVGACAQL  | VFAPIDESFA | DDAPLLPSGF | RVIPLDSKS  |
| Ara_thaPHABULOSA           | FLLQLCSGVD  | ENVVGGCAQL  | VFAPIDESFA | DDAPLLPSGF | RIIPLDOKS  |
| Ara_thaATHB15              | FLLQLCSGMD  | ENAVGTCAEL  | IFAPIDASFA | DDAPLLPSGF | RIIPLDSAK  |
| Ara_thaPHAVOLUTA           | YLLQLCSGVD  | ENVVGGCAQL  | VFAPIDESFA | DDAPLLPSGF | RVIPLDQKT  |
| Ara_thaATHB8               | FLLQMC SGVD | ENAVESCAEL  | IFAPIDASFS | DDAPIIPSGF | RIIPLDSKS  |
| Ara_thaREVOLUTA            | HLLQICTGID  | ENAVGACSEL  | IFAPINEMFP | DDAPLVPSGF | RVIIPVDAKT |
| Vit_vinHOX32-like          | YLLQLCSGVD  | ENAAGACAQL  | VFAPIDESFA | DDAPLLPSGF | RVIPLDPKT  |
| The_cacXP_007022870.1      | YLLQLCSGID  | ENAVGACAQL  | VFAPIDESFA | DDAPLLPSGF | RVIPLDPKT  |
| Ory_satHOX32               | YLLQLCSGVD  | ENAAGACAQL  | VFAPIDESFA | DDAPLLPSGF | RVIPLDGKT  |
| Pru_perppa001343mg         | YLLQLCSGVD  | ENAVGSCAQL  | VFAPIDESFA | DDAPLLPSGF | HVIPLDPKT  |
| Bra_disHOX32-like          | YLLQLCSGVD  | ENAAGACAQL  | VFAPIDESFA | DDAPLLPSGF | RVIPLDAKT  |
| Pop_triPHABULOSA           | YLLQLCSGVD  | ENAVGACAQL  | VFAPIDESFA | DDAPLLSSGF | RVIPLDPKT  |
| Pop_triPHABULOSAb          | YLLQLCSGVD  | ENALGACAQL  | VFAPIDESFA | DDAPLLPSGF | RVIPLDPKT  |
| Fra_vesHOX32-like          | FLLQMC SGVD | ENAVGSCAQL  | VFAPIDESFA | DDAPLLPSGF | HVIPLDAKT  |
| Gly_maxATHB-14-like        | YLLQLCSGVD  | ESAVGACAQL  | VFAPIDESFA | DDALLPSGF  | RVIPLDPKS  |
| Gly_maxREVOLUTA-like       | HLLQICSGID  | ENAVGACSEL  | VFAPIDEMFP | DDAPLVPSGF | RIIPLDSKP  |
| Gly_maxREVOLUTA-likeb      | HLLQICSGID  | ENAVGACSEL  | VFAPIDEMFP | DDAPLIPSGF | RIIPLDSKP  |
| Pru_perREV_IFL1            | HLLQICSGVD  | ENAVGACSEL  | VFAPIDEMFP | DDAPLVPSGF | RIIPLDSKT  |
| Ory_satHOX33               | YLLQLCSGVD  | ENATSASAQL  | VFAPIDESFA | DDAPLLPSGF | RVIPLDTKM  |
| Sol_tubATHB-14-like        | YLLQLCSGVD  | ENAAGACAQL  | VFAPIDESFG | DDAPLIPSGF | RVIIPLEPKS |
| The_cacXP_007022872.1      | YLLQLCSGID  | ENAVGACAQL  | VFAPIDESFA | DDAPLLPSGF | RVIPLDPKT  |
| Ory_satHOX33-like          | YLLQLCSGVD  | ENATSASAQL  | VFAPIDESFA | DDAPLLPSGF | RVIPLDTKM  |
| Sol_lycREVOLUTA-like       | HLLQMC SGTD | ENAVGACSEL  | VFAPIDEMFP | DDAPLLPSGF | RIIPLDSKS  |
| Sol_lycHOX32-like          | YLLQLCSGVD  | ENAAGACAQL  | VFAPIDESFG | DDAPLLPSGF | RVIIPLEPKS |
| Gly_maxATHB-14-likeb       | YLMQLCSGID  | ENAIGACAQL  | VFAPIDESFA | DDALLPSGF  | RIIPLDPKT  |
| Pop_triXP_006378973.1      | HLLQICSGID  | ENAVGACSEL  | VFAPIDEMFP | DDAPLLPSGF | RVIIPLESKT |
| Ory_satACA64837.1          | YLLQLCSGVD  | ENATSASAQL  | VFAPIDESFA | DDAPLLPSGF | RVIPLDTKM  |
| Vit_vin013992              | HLLQICSGVD  | ENAVGACSEL  | VFAPIDEMFP | DDAPLLPSGF | RIIPLDSKS  |
| Ory_satOsJ_11861           | YLLQLCSGVD  | ENAAGACAQL  | VFAPIDESFA | DDAPLLPSGF | RVIPLDGKT  |
| Sol_tubREVOLUTA-like       | HLLQMC SGTD | ENAVGACSEL  | VFAPIDEMFP | DDAPLLPSGF | RIIPLDSKS  |
| Gly_maxATHB-14-likec       | YLMQLCSGID  | ENAIGACAQL  | VFAPIDESFA | DDALLPSGF  | RIIPLDPKT  |
| The_cacXP_007024277.1      | FLLQLCSGMD  | ENAVGTCAEL  | IFAPIDASFA | DDAPLLPSGF | RIIPLDSGK  |
| Vit_vinATHB-15-like        | FLLQLCSGMD  | ENAVGTCAEL  | IFAPIDASFA | DDAPLLPSGF | RIIPLDSGK  |
| Ric_comXP_002515977.1      | FLLQLCSGMD  | ENAVGTCAEL  | IFAPIDASFA | DDAPLLPSGF | RIIPLDSAK  |
| The_cacXP_007016751.1      | HLLQICSGID  | ENAVGACSEL  | VFAPIDEMFP | DDAPLLPSGF | RIIPLDSKP  |
| Sol_tubHOX32-like          | YLLQLCSGVD  | ENAAGACAQL  | VFAPIDESFG | DDAPLLPSGF | RVIIPLEPKS |
| Sol_lycATHB-14-like        | YLLQLCSGVE  | ENATGACAQL  | VFAHIDESFG | DDAPLLPSGF | SVIIPLEPKS |
| Sol_tubATHB-14-like_X1     | YLLQLCSGVE  | ENATGACAQL  | VFAHIDESFG | DDAPLLPSGF | SVIIPLEPKS |
| Med_truATHB-14             | YLLQLCSGID  | ENSVGACAQL  | VFAPIDESFA | DDALLPSGF  | RVIPLDPKS  |
| Zea_mayNP_001142394.1      | FLLQLCSGVD  | EDAPGACAQL  | VFAPIDESFA | DDAPLLPSGF | RVIPLDAKT  |
| Vit_vinREVOLUTA            | HLLQICSGVD  | ENAVGACSEL  | VFAPIDEMFP | DDAPLLPSGF | RIIPLDSKS  |
| Ory_braHOX32-like          | YLLQLCSGVD  | ENAAGACAQL  | VFAPIDESFA | DDAPLLPSGF | RVIPLDAKA  |
| Ric_comXP_002529946.1      | HLLQICSGID  | ENAVGACSEL  | VFAPIDEMFP | DDAPLLPSGF | RIIPLDSKT  |
| Tha_cacXP_007016749.1      | HLLQICSGID  | ENAVGACSEL  | VFAPIDEMFP | DDAPLLPSGF | RIIPLDSKP  |
| Fra_vesREVOLUTA-like       | HLLQICSGVD  | ENAVGACSEL  | VFAPIDEMFP | DDAPLLPSGF | RIIIPLESKT |
| Zea_mayNP_001146215.1      | FLLQLCSGID  | EDAPGACAQL  | VFAPIDESFA | DDAPLLPSGF | RVIPLDAKT  |
| The_cacXP_007012152.1      | FLLQLCSGVD  | ENAVGTCAEL  | IFAPIDASFS | DDAPIIPSGF | RIIPLDSGM  |
| Pru_perppa001386mg         | FLLQLCSGVD  | ENSVGTCAEL  | VFAPIDASFS | DDGPILPSGF | RIIPLDSRM  |
| Pop_triAAX19057.1          | FLLQLCSGVD  | ENAVGTCAEL  | IFAPIDASFS | DDAPIIPSGF | RIIPLDSGM  |
| Pop_triXP_002309538.2      | FLLQLCSGVD  | ENAVGTCAEL  | IFAPIDASFS | DDAPIIPSGF | RIIPLDSGM  |
| Fra_vesATHB-8-like         | FLLQLCSGVD  | ENAVGTCAEL  | VFAPIDASFS | DDAPILPSGF | RIIPLDSHM  |
| Pop_triXP_002324794.1      | FLLQLCSGVD  | ENAVGTCAEL  | IFAPIDASFS | DDAPIIPSGF | RIIPLDSGM  |
| Vit_vin009744              | FLLQLCSGVD  | DNAVGTCSSEL | IFAPIDASFS | DDAPLLPSGF | RIIPLDSGV  |
| Gly_maxATHB-8-like         | FLLQLCSGVD  | EHAVG TSAEL | VFAPIDASFS | DDAPILPSGF | RIIPLDSGT  |
| Sol_lycATHB-15-like        | FLLQLCNGVD  | ENAVGTCAEL  | MFAPIDASFA | DDAPLLPSGF | RIIPLDSKA  |
| Gly_maxATHB-8-likeb        | FLLQLCSGVD  | EHAVG TSAEL | VFAPIDASFS | DDAPILPSGF | RIIPLDSGT  |
| Med_truXP_003603630.1      | FLLQLCSGVD  | EHAVG TSAEL | IFAPIDASFS | DDAPILPSGF | RIIIPLESKT |

|                            |       |            |        |         |            |           |           |           |        |          |
|----------------------------|-------|------------|--------|---------|------------|-----------|-----------|-----------|--------|----------|
| AmTr_v1.0_scaffold00148.15 | ---   | NPODNT     | AAA    | IRTLDL  | TSSLDIGSA  | -         | TNRASGDGG | GPNS      | CNNLRS |          |
| AmTr_v1.0_scaffold00056.60 | ----- | DG         | SSP    | NRTL DL | ASALEVGPA  | -         | GNRISGEFA | GGSGS     | --LRS  |          |
| AmTr_v1.0_scaffold00155.45 | ----- | DG         | PGT    | NRTL DL | ASSIDVGST  | -         | GSRPSGESG | A-NGY     | -TMRS  |          |
| Ara_thaPHABULOSA           | ----- | TPNG       | ASA    | NRTL DL | ASALE---   | G-        | STRQAGEAD | P-NGC     | -NFRS  |          |
| Ara_thaATHB15              | ----- | EV         | SSP    | NRTL DL | ASALEIGSA  | -         | GTKASTDQS | GNSTC     | --ARS  |          |
| Ara-thaPHAVOLUTA           | ----- | NPN        | DH     | QSA     | SRTL DL    | ASSLD---  | G-        | STKTDSET- | -----  | NSRL     |
| Ara_thaATHB8               | ----- | EG         | LSP    | NRTL DL | ASALDVG    | -         | -         | SRTAGDSC  | GSRGN  | --SKS    |
| Ara_thaREVOLUTA            | ----- | GDVQDL     | LTAN   | HRTL DL | TSSLEVGPS  | -         | PENASGNS  | -         | --     | FSSSSSRC |
| Vit_vinHOX32-like          | ----- | DG         | PAA    | TRTL DL | ASTLEVGAG  | -         | GARPANESD | L-NNY     | -NLRS  |          |
| The_cacXP_007022870.1      | ---   | TLTCOSSADG | AGA    | TRTL DL | ASALEVGP   | -         | SNRLAGDGD | P-SNY     | -NLRS  |          |
| Ory_satHOX32               | ----- | DA         | PSA    | TRTL DL | ASTLEVGS   | -         | GTRASSDT  | S-STC     | -NTRS  |          |
| Pru_perppa001343mg         | ----- | DG         | PTA    | NRTL DL | ASTLEVGPS  | -         | GSRPVNEAD | G-NSY     | -NLRS  |          |
| Bra_disHOX32-like          | ----- | DA         | PSA    | TRTL DL | ASTLEVGS   | -         | GTRAASDA- | -         | --     | PSTSNTRS |
| Pop_triPHABULOSA           | ----- | DA         | PAT    | TRTL DL | ASTLEVGP   | -         | GTRPASEAD | T-NSY     | -NLRS  |          |
| Pop_triPHABULOSAb          | ----- | DA         | PAA    | TRTL DL | ASTLEVGP   | -         | GARPASEAD | T-NSY     | -NLRS  |          |
| Fra_vesHOX32-like          | ----- | DG         | PAT    | NRTL DL | ASTLEVGAS  | -         | SARRVNEGD | A-NSY     | -NLRS  |          |
| Gly_maxATHB-14-like        | ----- | DG         | PAP    | TRTL DL | ASTMEVGS   | -         | NARPAGEAD | L-NGY     | -NLRS  |          |
| Gly_maxREVOLUTA-like       | ---   | GDKKDA     | VAT    | NRTL DL | TSGFEVGPA  | -         | TTAGADA-  | -         | --     | SSSQNTRS |
| Gly_maxREVOLUTA-likeb      | ---   | GDKKEV     | ATN    | -       | RTRL DL    | TSGFEVGPA | -         | TTAGTDA-  | -      | SSSQNTRS |
| Pru_perREV_IFL1            | ---   | SDSKDT     | LAT    | HRTL DL | TSSLEVGST  | -         | TNNAAGEL- | -         | --     | SSFHNTRS |
| Ory_satHOX33               | ----- | DG         | PSA    | TRTL DL | ASALEVGP   | -         | GASRASVEA | S-GTC     | --     | NRS      |
| Sol_tubATHB-14-like        | ----- | DV         | PAA    | TRTL DL | ASTLEAGTGG | SG        | GTRPAGEIE | A-GNY     | -NHRS  |          |
| The_cacXP_007022872.1      | ---   | TLTCOSSADG | AGA    | TRTL DL | ASALEVGP   | -         | SNRLAGDGD | P-SNY     | -NLRS  |          |
| Ory_satHOX33-like          | ----- | DV         | PSA    | TRTL DL | ASALEVGP   | -         | GASRATDA  | S-GVC     | -NRS   |          |
| Sol_lycREVOLUTA-like       | ---   | GDAQDT     | LNA    | HRTL DL | ASSLEVGPA  | -         | TNSTTGDA- | -         | --     | ASCYSARS |
| Sol_lycHOX32-like          | ----- | DV         | PAA    | TRTL DL | ASTLEAGTGG | SG        | GTRPAGEIE | A-GNY     | -NHRS  |          |
| Gly_maxATHB-14-likeb       | ----- | DG         | PAS    | TRTL DL | ASTLETGSG  | -         | NARSAGESD | L-NNY     | -NLRS  |          |
| Pop_triXP_006378973.1      | ---   | KDAQEA     | LTT    | NRTL DL | TSSLEVGPV  | -         | TNHASVDG- | -         | --     | SSC-HLRS |
| Ory_satACA64837.1          | ----- | DG         | PSA    | TRTL DL | ASALEVGP   | -         | GASRASVEA | S-GTC     | --     | NRS      |
| Vit_vin013992              | ----- | DG         | GDTQET | LTT     | HRTL DL    | TSSLEVGPA | -         | TNQAAGDS- | -      | SSCYNTRS |
| Ory_satOsJ_11861           | ----- | DA         | PSA    | TRTL DL | ASTLEVGS   | -         | GTRASSDT  | S-STC     | -NTRS  |          |
| Sol_tubREVOLUTA-like       | ---   | GDAQDT     | LNA    | HRTL DL | ASSLEVGPA  | -         | RNSATGDM- | -         | --     | ASCYSARS |
| Gly_maxATHB-14-likec       | ----- | DG         | LAS    | TRTL DL | ASTLETGSG  | -         | NARSAGESD | S-NNY     | -NLRS  |          |
| The_cacXP_007024277.1      | ----- | EA         | SSP    | NRTL DL | ASALEIGPT  | -         | GNKASNDYS | GNSGC     | --     | MRS      |
| Vit_vinATHB-15-like        | ----- | EA         | SSP    | NRTL DL | ASALEIGPA  | -         | GNRSSNDYS | VNGGN     | --     | TRS      |
| Ric_comXP_002515977.1      | ----- | EA         | SSP    | NRTL DL | ASALEIGPA  | -         | GNKSSTDYS | SNSGC     | --     | MRS      |
| The_cacXP_007016751.1      | ---   | SDTQDS     | LTT    | NRTL DL | TSSLEVGTA  | -         | TNHAAGDA- | -         | --     | PSCONSRS |
| Sol_tubHOX32-like          | ----- | DV         | PAA    | TRTL DL | ASTLEAGTGG | SG        | GTRPAGEIE | A-GNY     | -NHRS  |          |
| Sol_lycATHB-14-like        | ----- | DS         | PSA    | ARTL DL | ASTLEARTG  | -         | GTRPAGEVE | G-SSY     | -NHRS  |          |
| Sol_tubATHB-14-like_X1     | ----- | DS         | PSA    | ARTL DL | ASTLEARTG  | -         | GTRLAGEVE | G-RSY     | -NHRS  |          |
| Med_truATHB-14             | ----- | DG         | PTT    | SRTL DL | LE---      | GSR       | NARPSGEGA | GSNGY     | -NLRS  |          |
| Zea_mayNP_001142394.1      | ----- | DV         | PTAT   | TRTL DL | ASALEVGS   | -         | GSGMRASCD | GSGTC     | -      | ATRS     |
| Vit_vinREVOLUTA            | ---   | GDTQET     | LTT    | HRTL DL | TSSLEVGPA  | -         | TNQAAGDS- | -         | --     | SSCYNTRS |
| Ory_braHOX32-like          | ----- | DA         | PSA    | TRTL DL | ASTLEVGS   | -         | GTRASSDT  | S-GTC     | -      | NTRS     |
| Ric_comXP_002529946.1      | ---   | KDTQDA     | LTT    | SRTL DL | TSSLEVGPA  | -         | ANNTAGDA- | -         | --     | SSSQSTRS |
| Tha_cacXP_007016749.1      | ---   | SDTQDS     | LTT    | NRTL DL | TSSLEVGTA  | -         | TNHAAGDA- | -         | --     | PSCONSRS |
| Fra_vesREVOLUTA-like       | ---   | SDSKDA     | LAT    | HRTL DL | TSSLEVGST  | -         | TNHNAGDL- | -         | --     | NSFHNTRS |
| Zea_mayNP_001146215.1      | ----- | DV         | PSA    | TRTL DL | ASALEVGS   | -         | GGLCALSDS | G-SGT     | RSTRS  |          |
| The_cacXP_007012152.1      | ----- | DA         | SSP    | NRTL DL | ASTLEVGAA  | -         | GNRATGDHS | GRCGS     | --     | TKS      |
| Pru_perppa001386mg         | ----- | DA         | PSP    | NRTL DL | ASALEVGP   | -         | GSRASGDNA | GHSGN     | --     | TKS      |
| Pop_triAAX19057.1          | ----- | DA         | SSP    | NRTL DL | ASALEVGP   | -         | GNRASGDLS | GRSGC     | --     | TKS      |
| Pop_triXP_002309538.2      | ----- | DA         | SSP    | NRTL DL | ASALEVGP   | -         | GNRASGDLS | GRSGC     | --     | TKS      |
| Fra_vesATHB-8-like         | ----- | DA         | PSP    | NRTL DL | ASALEVGP   | -         | GNRSSGDI  | GHCGS     | --     | TKS      |
| Pop_triXP_002324794.1      | ----- | DA         | SSP    | NRTL DL | ASALEVGP   | -         | GNRASGDLS | GRSGC     | --     | TKS      |
| Vit_vin009744              | ----- | DG         | SSP    | NRTL DL | ASSLEVGPA  | -         | GNKASSDNS | GHTGS     | --     | AKS      |
| Gly_maxATHB-8-like         | ----- | DA         | ASP    | NRTL DL | ASALEVGT   | -         | ANKAAGDNS | GHSGS     | --     | TKS      |
| Sol_lycATHB-15-like        | ----- | DA         | SSP    | NRTL DL | ASTLEVGPA  | -         | GSRPTGDHS | KNSGS     | --     | AKS      |
| Gly_maxATHB-8-likeb        | ----- | DA         | ASP    | NRTL DL | ASALEVGT   | -         | ANKAASDNS | AHSGS     | --     | TKS      |
| Med_truXP_003603630.1      | ----- | DA         | ASP    | NRTL DL | ASALEVGT   | -         | GNKAGGDNS | GHSGI     | --     | TKS      |

|                            |             |        |      |             |              |            |
|----------------------------|-------------|--------|------|-------------|--------------|------------|
| AmTr_v1.0_scaffold00148.15 | VLTIAFQFTF  | EPH--- | MRDN | VVAMARQYVR  | GVVGSVQ RVA  | MAISPSRLGA |
| AmTr_v1.0_scaffold00056.60 | VLTIAFQFSY  | ENNHEQ | IRDN | VATMARQYVR  | SVISSVQ RVA  | MALTPSRLNP |
| AmTr_v1.0_scaffold00155.45 | VLTIAFQFTY  | ETH--- | LRDN | VVAMARQYVR  | SVMASVQ RVA  | MAISPSRMGP |
| Ara_thaPHABULOSA           | VLTIAFQFTF  | DNH--- | SRDS | VASMARQYVR  | SIVGSIQ RVA  | LAIAP-RPGS |
| Ara_thaATHB15              | VMTIAFEFGI  | ESH--- | MQEH | VASMARQYVR  | GIISSVQ RVA  | LALSPSHISS |
| Ara-thaPHAVOLUTA           | VLTIAFQFTF  | DNH--- | SRDN | VATMARQYVR  | NVVGSIQ RVA  | LAITPRP--- |
| Ara_thaATHB8               | VMTIAFQLAF  | EMH--- | MQEN | VASMARQYVR  | SVIASVQ RVA  | LALSPSSH-Q |
| Ara_thaREVOLUTA            | ILTIAFQFPF  | ENN--- | LQEN | VAGMACQYVR  | SVISSVQ RVA  | MAISPSGISP |
| Vit_vinHOX32-like          | VLTIAFQFTF  | ENH--- | VRDN | VAAMARQYVR  | SVMASVQ RVA  | MAIAPSRLSS |
| The_cacXP_007022870.1      | VLTIAFQFTF  | ENH--- | LRDN | VAAMARQYVR  | SVVGSVQ RVA  | MAIAPSRLSS |
| Ory_satHOX32               | VLTIAFQFSY  | ENH--- | LRES | VAAMARQYVR  | TVVASVQ RVA  | MAIAPSRLGG |
| Pru_perppa001343mg         | VLTIAFQFTF  | ENH--- | LRDN | VAAMARQYVR  | SVVSSVQ RVA  | MAIAPSRLSS |
| Bra_disHOX32-like          | VLTIAFQFSY  | ENH--- | LRES | VASMARQYVR  | TVVASVQ RVA  | MAIAPSRLGG |
| Pop_triPHABULOSA           | VLTIAFQFSF  | ENH--- | MRDN | VAAMARQYVR  | GVVGSVQ RVA  | MAIAPSRLSS |
| Pop_triPHABULOSAb          | VLTIAFQFTF  | ENH--- | FRDN | VAAMARQYVR  | GVVASVQ RVA  | MAISPSRLSS |
| Fra_vesHOX32-like          | VLTIAFQFTF  | ENH--- | MRDS | VAAMARQYVR  | GVVSSVQ RVA  | MAIAPSRLSS |
| Gly_maxATHB-14-like        | VLTIAFQFTF  | ENH--- | TRDN | VAAMARQYVR  | SVVGSVQ RVA  | MAIAPSRLNT |
| Gly_maxREVOLUTA-like       | VLTIAFQFPF  | DSS--- | LQDN | VAVMARQYVR  | SVISSVQ RVA  | MAISPSGINP |
| Gly_maxREVOLUTA-likeb      | VLTIAFQFPF  | DSS--- | LQDN | VAVMARQYVR  | SVISSVQ RVA  | MAISPSGISP |
| Pru_perREV_IFL1            | VLTIAFQFPF  | ENS--- | LQEN | VATMARQYVR  | SVISSVQ RVA  | MAISPSGLSP |
| Ory_satHOX33               | VLTIAFQFSY  | ENH--- | LRES | VAAMARSYVR  | AVMASVQ RVA  | VAIAPSRLGP |
| Sol_tubATHB-14-like        | VLTIAFQFTF  | ESH--- | YQDN | VAAAMARQYVR | SIVGSIQ RVA  | MAIAPSRLSS |
| The_cacXP_007022872.1      | VLTIAFQFTF  | ENH--- | LRDN | VAAMARQYVR  | SVVGSVQ RVA  | MAIAPSRLSS |
| Ory_satHOX33-like          | VLTIAFQFSY  | ENH--- | LRDS | VAAMARNYVR  | AVMASVQ RVA  | VAIAPSRLGP |
| Sol_lycREVOLUTA-like       | VLTIAFQFPF  | EDN--- | LQDN | VATMARQYVR  | SVVSSVQ RVA  | MAISPTGMNP |
| Sol_lycHOX32-like          | VLTIASFQFTF | ESH--- | YQDN | VAAMARQYVR  | SIVGSIQ RVA  | MAIAPSRLSS |
| Gly_maxATHB-14-likeb       | VLTIAFQFTF  | ENH--- | LRDN | VAVMARQYVR  | NVVRVSVQ RVA | MAIAPSRIST |
| Pop_triXP_006378973.1      | VLTIAFQFPF  | ESN--- | LQDN | VATMARQYVR  | SVISSVQ RVA  | TAISPSGLNP |
| Ory_satACA64837.1          | VLTIAFQFSY  | ENH--- | LRES | VAAAMARSYVR | AVMASVQ RVA  | VAIAPSRLGP |
| Vit_vin013992              | VLTIAFQFPF  | ESN--- | LQDN | VATMARQYVR  | SVISSVQ RVA  | MAISPSGLGP |
| Ory_satOsJ_11861           | VLTIAFQFSY  | ENH--- | LRES | VAAMARQYVR  | TVVASVQ RVA  | MAIAPSRLGG |
| Sol_tubREVOLUTA-like       | VLTIAFQFPF  | EDN--- | LQDN | VATMARQYVR  | SVVSSVQ RVA  | MAISPTGMNP |
| Gly_maxATHB-14-likec       | VLTIAFQFTF  | ENH--- | LRDN | VAVMARQYVR  | NVVRVSVQ RVA | MAIAPSRLST |
| The_cacXP_007024277.1      | VMTIAFEFAP  | ESH--- | MQEH | VASMARQYVR  | SIISSVQ RVA  | LALSPSHLSS |
| Vit_vinATHB-15-like        | VMTIAFEFAP  | ESH--- | LQEN | VASMARQYVR  | SIISSVQ RVA  | LALSPSHLSS |
| Ric_comXP_002515977.1      | VMTIAFEFAP  | ESH--- | MQEH | VASMARQYVR  | SIISSVQ RVA  | LALSPSHSGS |
| The_cacXP_007016751.1      | VLTIALQFPF  | DSN--- | LQDN | VAAMARQYVR  | SVIASVQ RVA  | MAISPSGLSP |
| Sol_tubHOX32-like          | VLTIASFQFTF | ESH--- | YQDN | VAAMARQYVR  | SIVGSIQ RVA  | MAIAPSRLSS |
| Sol_lycATHB-14-like        | VLTIAFQFAF  | ENH--- | YREN | VAAMARQYVR  | SIVGSIQ RVA  | MAIAPSRLCS |
| Sol_tubATHB-14-like_X1     | VLTIAFQFAF  | ENH--- | YREN | VAAMARQYVR  | SIVGSIQ RVA  | MAIAPSRLCS |
| Med_truATHB-14             | VLTIAFQFTF  | ENH--- | LRDN | VASMARQYVR  | SVVASVQ RVA  | MAIAPSRPGT |
| Zea_mayNP_001142394.1      | VLTIAFQFSF  | ENH--- | LRES | VAAAMAKQYVR | GVMASVQ RVA  | MAIAPSRLGS |
| Vit_vinREVOLUTA            | VLTIAFQFPF  | ESN--- | LQDN | VATMARQYVR  | SVISSVQ RVA  | MAISPSGLGP |
| Ory_braHOX32-like          | VLTIAFQFSY  | ENH--- | LRES | VAAMARQYVR  | TVVASVQ RVA  | MAIAPSRLGG |
| Ric_comXP_002529946.1      | VLTIAFQFPF  | ESN--- | LQEN | VATMARQYVR  | SVISSVQ RVA  | MAISPSGLGP |
| Tha_cacXP_007016749.1      | VLTIALQFPF  | DSN--- | LQDN | VAAMARQYVR  | SVIASVQ RVA  | MAISPSGLSP |
| Fra_vesREVOLUTA-like       | VLTIAFQFPF  | ESS--- | LQDN | VASMARQYVR  | NVISSVQ RVA  | MAISPSGLSP |
| Zea_mayNP_001146215.1      | VLTIAFQFSF  | ENH--- | LRES | VAAMARQYVR  | AVMAIVQ RVA  | MAISPSRLGP |
| The_cacXP_007012152.1      | VMTIAFQFVY  | EIH--- | LQEN | VATMARQYVR  | SIIASVQ RVA  | LALSPSRFGS |
| Pru_perppa001386mg         | VMTIAFQFAF  | EIH--- | LQDN | VASMARQYVR  | SIIASVQ RVA  | LALSPSRFGS |
| Pop_triAAX19057.1          | VMTIAFQFAF  | EMH--- | LQEN | VASMARQYVR  | SIIASVQ RVA  | LALSPSHFGS |
| Pop_triXP_002309538.2      | VMTIAFQFAF  | EMH--- | LQEN | VTSMARQYVR  | SIIASVQ RVA  | LALSPSHFGS |
| Fra_vesATHB-8-like         | VMTIAFQFAF  | EIH--- | LQDN | VASMARQYVR  | SIIASVQ RVA  | LALSPSRFGS |
| Pop_triXP_002324794.1      | VMTIAFQFAF  | EMH--- | LQEN | VASMARQYVR  | SIIASVQ RVA  | LALSPSHFGS |
| Vit_vin009744              | VMTISFQFAF  | EMH--- | LQEN | VASMARQYVR  | SIISSVQ RVA  | LALSPSRFGP |
| Gly_maxATHB-8-like         | VMTIAFQFAF  | EVH--- | LQEN | IATMARQYVR  | SIIASVQ RV   | LALSPSRFGS |
| Sol_lycATHB-15-like        | VMTIAFQFAF  | EIH--- | LQES | IAAMARQYVR  | SIISSVQ RVA  | LALSPSRIGS |
| Gly_maxATHB-8-likeb        | VMTIAFQFAF  | EVH--- | LQEN | IATMARQYVR  | SIIASVQ RV   | LALSPSRFGS |
| Med_truXP_003603630.1      | VMTIAFQFAF  | EAH--- | LQDN | IAAMARQYVR  | SIVASVQ RV   | LALSPSRFGS |



|                            |          |         |             |            |      |        |          |            |       |
|----------------------------|----------|---------|-------------|------------|------|--------|----------|------------|-------|
| AmTr_v1.0_scaffold00148.15 | QM-GPRLP | PPG     | SPEAVTLTRW  | ITHSY      | ---- | ----   | RFHLGV   | DLLRADCH   | -A    |
| AmTr_v1.0_scaffold00056.60 | HN-GLRPP | PPG     | TPEALTLARW  | ICHSY      | ---- | ----   | RFHLGV   | ELLRPNGE   | -G    |
| AmTr_v1.0_scaffold00155.45 | GL-GPRPP | PPG     | TPEAVTLARW  | ICQSY      | ---- | ----   | RFHSGV   | ELLRVDSQ   | -A    |
| Ara_thaPHABULOSA           | NI-SPISV | P       | SPEALTLVRW  | ISRSY      | ---- | ----   | SLHTGA   | DLFGSDSQT  | S     |
| Ara_thaATHB15              | QV-GLRTP | PLG     | TPEAQTARW   | ICQSY      | ---- | ----   | RGYMGV   | ELLKNSD    | -G    |
| Ara_thaPHAVOLUTA           | ---      | GSMQLPT | SPEALTLVRW  | ITRSY      | ---- | ----   | SIHTGA   | DLFGADSQ   | S     |
| Ara_thaATHB8               | LS-GLRPP | PPA     | SPEAHTLARW  | ISHSY      | ---- | ----   | RCYLG    | DLLK--     | -PH-G |
| Ara_thaREVOLUTA            | SL-GSKL  | SPG     | SPEAVTLAQW  | ISQSY      | ---- | ----   | SHHLGS   | ELLTIDSL   | -G    |
| Vit_vinHOX32-like          | HM-GLKPL | PLG     | SPEALTLARW  | ICRSY      | ---- | ----   | RIHTGG   | ELLRVDSQ   | -G    |
| The_cacXP_007022870.1      | NM-EPKAL | PLG     | SPEALTLARW  | ICRSY      | ---- | ----   | RIHTGE   | ELLRVDSQ   | -A    |
| Ory_sathOX32               | QI-ETKN  | NPPG    | SPEAHTLARW  | IGRSY      | ---- | ----   | RFHTGA   | DLLRTDSQ   | -S    |
| Pru_perppa001343mg         | QM-VPKLP | PLG     | SPEAHTLARW  | ICRSY      | ---- | ----   | RIHTGA   | ELFRVDSQ   | -S    |
| Bra_disHOX32-like          | QI-EMKN  | NPPG    | SPEAHTLARW  | IGKSY      | ---- | ----   | RFHTGA   | ELLECTDSQ  | -S    |
| Pop_tripHABULOSA           | NV-GPKTL | PLG     | SPEALTLAQW  | ICRSY      | ---- | ----   | RIHTGG   | ELFRVESQ   | -A    |
| Pop_tripHABULOSAb          | NM-GPKSL | PLV     | SPEALTLARW  | IYRSY      | ---- | ----   | RIHTGG   | ELFRVDSQ   | -A    |
| Fra_vesHOX32-like          | QI-GPKAL | PLG     | SPEAQTARW   | IFQSY      | ---- | ----   | RIHTGA   | EIFRLESP   | -S    |
| Gly_maxATHB-14-like        | QL-APKSL | PLG     | SPEALTLARW  | IFRSY      | ---- | ----   | RMHTGT   | ELFKAEST   | -A    |
| Gly_maxREVOLUTA-like       | SI-GAKLS | SPG     | SPEAVTLAHW  | ICQSY      | ---- | ----   | SYLGS    | DLLRSDSL   | -V    |
| Gly_maxREVOLUTA-likeb      | SV-GAKLS | SPG     | SPEAVTLAHW  | ICQSY      | ---- | ----   | SYIGS    | DLLRSDSL   | -V    |
| Pru_perREV_IFL1            | SLGGPKL  | SPG     | SPEALTLAHW  | ICQSY      | ---- | ----   | SFHVGA   | ELLRPDSL   | -G    |
| Ory_sathOX33               | QI-GMKHP | PPA     | SPEALTLASW  | IGRSY      | ---- | ----   | RAHTGA   | DIRWSDTE   | -D    |
| Sol_tubATHB-14-like        | QL-TPKSF | PLG     | SPEAVTLARW  | ISRSY      | ---- | ----   | RVHTGG   | DLFOVDSQ   | -A    |
| The_cacXP_007022872.1      | NM-EPKAL | PLG     | SPEALTLARW  | ICRSY      | ---- | ----   | RIHTGE   | ELLRVDSQ   | -A    |
| Ory_sathOX33-like          | QI-GMKHP | PPA     | SPEALTLASW  | IGRSY      | ---- | ----   | RVHTGA   | DIRWSDTE   | -D    |
| Sol_lycREVOLUTA-like       | TL-GAKLS | SPG     | SPEAVTLASHW | ICQSY      | ---- | ----   | SYHMTG   | ELLRADSS   | -G    |
| Sol_lycHOX32-like          | QL-TPKSF | PLV     | SPEAVTLARW  | ISRSY      | ---- | ----   | RVNTGG   | DLFOVDSQ   | -A    |
| Gly_maxATHB-14-likeb       | QL-GPKSL | PLG     | PPEALTLARW  | ICKSY      | ---- | ----   | SLHTCT   | ELFSVEST   | -S    |
| Pop_triXP_006378973.1      | AL-GPKLS | SAG     | SPEALTLAHW  | ICQSYWQVLP | QVSS | CYHLGA | ELLRSDSV | -G         |       |
| Ory_satAC64837.1           | QI-GMKHP | PPA     | SPEALTLASW  | IGRSY      | ---- | ----   | RAHTGA   | DIRWSDTE   | -D    |
| Vit_vin013992              | AV-GPKLS | SAG     | SPEALTLAHW  | ICQSY      | ---- | ----   | SYHVGA   | ELLRSDSV   | -G    |
| Ory_satOsJ_11861           | QI-ETKN  | NPPG    | SPEAHTLARW  | IGRSY      | ---- | ----   | RFHTGA   | DLLRTDSQ   | -S    |
| Sol_tubREVOLUTA-like       | TL-GAKLS | SPG     | SPEAVTLASHW | ICQSY      | ---- | ----   | SYHMTG   | ELLRADSS   | -G    |
| Gly_maxATHB-14-likec       | QL-TPKSF | PLG     | PPEALTLARW  | ICRSY      | ---- | ----   | RLHTCT   | ELFSVEST   | -S    |
| The_cacXP_007024277.1      | HA-GLRTP | PLG     | TPEAQTARW   | ICQSY      | ---- | ----   | RLYMGV   | ELLKSGSE   | -G    |
| Vit_vinATHB-15-like        | HA-GLRPP | PLG     | TPEAHTLARW  | ISHSY      | ---- | ----   | RCYLG    | ELLKSSGE   | -G    |
| Ric_comXP_002515977.1      | HA-GLRTP | PLG     | TPEAQTARW   | ICQSY      | ---- | ----   | RCYLG    | ELLKSSSE   | -G    |
| The_cacXP_007016751.1      | TV-GPKLS | SPG     | SPEALTLAHW  | ICQSY      | ---- | ----   | SYHLGA   | ELLRAESL   | -G    |
| Sol_tubHOX32-like          | QL-TPKSF | PLV     | SPEAVTLARW  | ISRSY      | ---- | ----   | RVNTGG   | DLFOVDSQ   | -A    |
| Sol_lycATHB-14-like        | QL-TPKSF | PLG     | SPEAVTLARW  | ICRSY      | ---- | ----   | KNHTGG   | ELLQVDSQ   | -A    |
| Sol_tubATHB-14-like_X1     | QL-TPKSF | PLG     | SPEAVTLARW  | ICRSY      | ---- | ----   | KNHTGG   | ELLQVESQAA | -G    |
| Med_truATHB-14             | QL-GPKSL | PLG     | SPEAHALARW  | ISRSY      | ---- | ----   | RMHTGA   | ELFRVESA   | -A    |
| Zea_mayNP_001142394.1      | RI-ELKH  | PPG     | SPEALALATW  | IGRSY      | ---- | ----   | RAHTGT   | EIRWSDTE   | -G    |
| Vit_vinREVOLUTA            | AV-GPKLS | SAG     | SPEALTLAHW  | ICQSY      | ---- | ----   | SYHVGA   | ELLRSDSV   | -G    |
| Ory_braHOX32-like          | QI-ETKH  | PPG     | SPEAHTLARW  | IGRSY      | ---- | ----   | RFHTGA   | DLLRTDSQ   | -S    |
| Ric_comXP_002529946.1      | AV-GPKLS | SPG     | SPEALTLAHW  | ICQSY      | ---- | ----   | SYLGA    | ELLRSDSL   | -A    |
| Tha_cacXP_007016749.1      | TV-GPKLS | SPG     | SPEALTLAHW  | ICQSY      | ---- | ----   | SYHLGA   | ELLRAESL   | -G    |
| Fra_vesREVOLUTA-like       | SM-GPKLS | SPG     | SPEALTLANW  | ICQSY      | ---- | ----   | SYHLGA   | ELLQPDSL   | -G    |
| Zea_mayNP_001146215.1      | HV-ELKH  | PPG     | SPEALALASW  | IGRSY      | ---- | ----   | RAHTGT   | EIRWSDTEDA | -G    |
| The_cacXP_007012152.1      | LA-DFRTP | PPG     | TPEAQTLAGW  | ICDSY      | ---- | ----   | RCYLG    | ELLK--     | -NE-G |
| Pru_perppa001386mg         | NS-GFRPP | PPG     | TPEAQTLAGW  | ICQSY      | ---- | ----   | RCYLG    | DLLK--     | -SE-G |
| Pop_triAAX19057.1          | HA-GFRPP | PPG     | TPEAHTLARW  | ICESY      | ---- | ----   | RCYLG    | ELLK--     | -NE-G |
| Pop_triXP_002309538.2      | HA-GFRPP | PPG     | TPEAHTLARW  | ICESY      | ---- | ----   | RCYLG    | ELLK--     | -NE-G |
| Fra_vesATHB-8-like         | HA-GFRPP | PPG     | TPEAQTLAGW  | ICQSY      | ---- | ----   | RCYLG    | ELLK--     | -SE-G |
| Pop_triXP_002324794.1      | HA-GFWPP | PHG     | TPEAHTLARW  | ICESY      | ---- | ----   | RIYLG    | KLLK--     | -NE-G |
| Vit_vin009744              | QM-GFRPL | PLG     | TPEAHTLARW  | ICQSY      | ---- | ----   | RCYLG    | ELLKPSNE   | -G    |
| Gly_maxATHB-8-like         | HN-AFHL  | PPG     | TPEAQTARW   | ICNSY      | ---- | ----   | RFYLG    | ELLK--     | -CE-G |
| Sol_lycATHB-15-like        | LP-GLRSP | PPG     | TPEAQTARW   | ICQSY      | ---- | ----   | RFFLG    | ELLKSASG   | -G    |
| Gly_maxATHB-8-likeb        | HN-AFHL  | PPG     | TPEAQTARW   | ICNSY      | ---- | ----   | RFYLG    | ELLK--     | -CE-G |
| Med_truXP_003603630.1      | QN-AFPL  | PPG     | TPEAQTTRW   | ICNSY      | ---- | ----   | RFYLG    | ELLK--     | -CE-G |

|                            |            |             |    |     |    |    |     |      |       |            |
|----------------------------|------------|-------------|----|-----|----|----|-----|------|-------|------------|
| AmTr_v1.0_scaffold00148.15 | -GDSVMKLLW | HYSDAIMCCS  | LK | --- | AL | P  | VFT | --   | FANQA | GLDMLETTLV |
| AmTr_v1.0_scaffold00056.60 | -GESLLKMLW | HHADAIMCCS  | LK | --- | AL | P  | VFT | --   | FANQA | GLDMLETTLV |
| AmTr_v1.0_scaffold00155.45 | -GDSLLKLLW | HHSDAIMCCS  | LK | --- | AS | P  | IFS | --   | FSNQA | GLDMLETTLV |
| Ara_thaPHABULOSA           | -GDTLLHQLW | NHSDAILCCS  | LK | TN  | -- | AS | P   | VFT  | --    | FANQT      |
| Ara_thaATHB15              | -NESILKNLW | HHTDAI ICCS | MK | --- | AL | P  | VFT | --   | FANQA | GLDMLETTLV |
| Ara-thaPHAVOLUTA           | GGDTLLKQLW | DHSDAILCCS  | LK | TN  | -- | AS | P   | VFT  | --    | FANQA      |
| Ara_thaATHB8               | -TD-LLKSLW | HHPDVAVMCCS | LK | --- | AL | SP | VFT | --   | FANQA | GLDMLETTLV |
| Ara_thaREVOLUTA            | SDDSVLKLLW | DHQDAILCCS  | LK | --- | PQ | P  | VFM | --   | FANQA | GLDMLETTLV |
| Vit_vinHOX32-like          | -GDAVLKLLW | NHSDAIMCCS  | LK | TN  | -- | AS | P   | VFT  | --    | FANQA      |
| The_cacXP_007022870.1      | -GDALLKQLW | HHSDAIMCCS  | LK | TN  | -- | AS | P   | VFT  | --    | FANQA      |
| Ory_sathOX32               | -TDSSLKAMW | QHSDSIMCCS  | LK | --- | AA | P  | VFT | --   | FANQA | GLDMLETTLI |
| Pru_perppa001343mg         | -GDAVLKQLW | HHSDAIMCCS  | VK | TN  | -- | AS | P   | VFT  | --    | FANQA      |
| Bra_disHOX32-like          | -ADALKALW  | QHSDSIMCCS  | LK | --- | AA | P  | VFT | --   | FANQA | GLDMLETTLI |
| Pop_tripHABULOSA           | -GDALLKQLW | HHSDAIMCCS  | LK | TN  | -- | AS | P   | VFT  | --    | FANQA      |
| Pop_tripHABULOSAb          | -GDALLKRLW | HHSDAIMCCS  | LK | TN  | -- | AS | P   | VFT  | --    | FANQA      |
| Fra_vesHOX32-like          | -GDAVLKQLW | NHPDAIMCCS  | VK | TN  | -- | AS | P   | VFT  | --    | FANQA      |
| Gly_maxATHB-14-like        | -GDAILKQLW | HHPDAILCCS  | VK | TN  | -- | AS | P   | VFT  | --    | FANQA      |
| Gly_maxREVOLUTA-like       | -GDMMLKQLW | HHQDAILCCS  | LK | --- | SL | P  | VFI | --   | FANQA | GLDMLETTLV |
| Gly_maxREVOLUTA-likeb      | -GDMMLKQLW | HHQDAILCCS  | LK | --- | PL | P  | VFI | --   | FANQA | GLDMLETTLV |
| Pru_perREV_ IFL1           | -GDSMLKHLW | HHQDAILCCS  | LK | --- | SL | P  | VFI | --   | FANQA | GLDMLETTLV |
| Ory_sathOX33               | -ADSPLALLW | KHSDAILCCS  | LK | --- | PA | P  | MFT | --   | FANNA | GLDILETTLV |
| Sol_tubATHB-14-like        | -GDAVLKQLW | HHSDAIMCCS  | VK | MN  | -- | AS | A   | VFT  | --    | FANQA      |
| The_cacXP_007022872.1      | -GDALLKQLW | HHSDAIMCCS  | LK | TN  | -- | AS | P   | VFT  | --    | FANQA      |
| Ory_sathOX33-like          | -ADSPLALLW | KHNDAILCCS  | LK | --- | PA | P  | MFT | --   | FANNA | GLDILETTLV |
| Sol_lycREVOLUTA-like       | -DESVLKNLW | QHQDAILCCS  | LK | --- | SL | P  | VFI | --   | FANKA | GLDMLETTLV |
| Sol_lycHOX32-like          | -GDAVLKQLW | HHSDAIMCCS  | VK | MN  | VS | AS | A   | VFT  | --    | FANQA      |
| Gly_maxATHB-14-likeb       | -GDAILKQLW | HHPDAILCCS  | VK | TN  | -- | AS | P   | VFT  | --    | FANQA      |
| Pop_triXP_006378973.1      | -GDSVLKHLW | HHPDAILCCS  | LE | --- | AL | P  | VFI | --   | FANQA | GLDMLETTLV |
| Ory_satACA64837.1          | -ADSPLALLW | KHSDAILCCS  | LK | --- | PA | P  | MFT | --   | FANNA | GLDILETTLV |
| Vit_vin013992              | -GDSVLKNLW | HHQDAILCCS  | LK | --- | SL | P  | VLI | --   | FANQA | GLDMLETTLV |
| Ory_satOsJ_11861           | -TDSSLKAMW | QHSDSIMCCS  | LK | --- | AA | P  | VFT | --   | FANQA | GLDMLETTLI |
| Sol_tubREVOLUTA-like       | -DESVLKNLW | QHQDAILCCS  | LK | --- | SL | P  | VFI | --   | FANKA | GLDMLETTLV |
| Gly_maxATHB-14-likec       | -GDAILKQLW | HHPDAILCCS  | VK | TD  | -- | AS | P   | VFT  | --    | FANQA      |
| The_cacXP_007024277.1      | -SETILKTLW | HHSDAILCCS  | LK | --- | AL | P  | VFT | --   | FANQA | GLDMLETTLV |
| Vit_vinATHB-15-like        | -SETILKTLW | HLSDAIMCCS  | LK | --- | AL | P  | VFT | --   | FANQA | GLDMLETTLV |
| Ric_comXP_002515977.1      | -GESILKTLW | HHSDAIMCCS  | LK | --- | AL | P  | VFT | --   | FANQA | GLDMLETTLV |
| The_cacXP_007016751.1      | -GDAVLKNLW | QHQDAILCCS  | LK | --- | SL | P  | VFI | --   | FANQA | GLDMLETTLV |
| Sol_tubHOX32-like          | -GDAVLKQLW | HHSDAIMCCS  | VK | MN  | VS | AS | A   | VFT  | --    | FANQA      |
| Sol_lycATHB-14-like        | -GDAVLKQLW | HHTDSIMCCS  | VK | MN  | -- | DS | A   | FFS  | --    | FANQA      |
| Sol_tubATHB-14-like_X1     | -GDAVLKQLW | HHTDSIMCCS  | VK | MN  | -- | DS | A   | VFS  | --    | FSNQA      |
| Med_truATHB-14             | -SDAILKQLW | HHSDAIMCCS  | VK | TN  | -- | AS | P   | IFT  | --    | FSNQA      |
| Zea_mayNP_001142394.1      | -ADSPLMLFW | KHSDAILCCS  | LK | --- | P  | -- | P   | AFTL | K     | FANSA      |
| Vit_vinREVOLUTA            | -GDSVLKNLW | HHQDAILCCS  | LK | --- | SL | P  | VLI | --   | FANQA | GLDMLETTLV |
| Ory_braHOX32-like          | -TDSSLKAMW | QHSDSIMCCS  | LK | --- | AA | P  | VFT | --   | FANQA | GLDMLETTLI |
| Ric_comXP_002529946.1      | -GDSVLKQLW | HHQDAILCCS  | LK | --- | SL | P  | VFI | --   | FANQA | GLDMLETTLV |
| Tha_cacXP_007016749.1      | -GDAVLKNLW | QHQDAILCCS  | LK | --- | SL | P  | VFI | --   | FANQA | GLDMLETTLV |
| Fra_vesREVOLUTA-like       | -GDSMLKHLW | HHQDAILCCS  | LK | --- | SV | P  | VFI | --   | FANQA | GLDMLETTLV |
| Zea_mayNP_001146215.1      | -AGSPLTLFW | KHSDAI ICCS | LK | --- | -- | -- | P   | AFTL | K     | FANSA      |
| The_cacXP_007012152.1      | -SESILKMLW | HHTDAVLCCS  | LK | --- | AL | P  | VFT | --   | FANQA | GLDMLETTLV |
| Pru_perppa001386mg         | -SESILKSLW | HHSDAILCCS  | LK | --- | AL | P  | VFT | --   | FANQA | GLDMLETTLV |
| Pop_triAAX19057.1          | -SESILKTLW | HHSDALMCCS  | LK | --- | TL | P  | VFT | --   | FANQA | GLDMLETTLV |
| Pop_triXP_002309538.2      | -SESILKTLW | HHSDALMCCS  | LK | --- | TL | P  | VFT | --   | FANQA | GLDMLETTLV |
| Fra_vesATHB-8-like         | -SESILKTLW | HHSDAILCCS  | LK | --- | AL | P  | VFT | --   | FANQA | GLDMLETTLV |
| Pop_triXP_002324794.1      | -SDSILKTLW | HHSDALVCCS  | LK | --- | TL | P  | VFT | --   | FSNQA | GLDMLETTLV |
| Vit_vin009744              | -NESILKTLW | HHSDAVMCCS  | LK | --- | AL | P  | VFT | --   | FANQA | GLDMLETTLV |
| Gly_maxATHB-8-like         | -SESILKSLW | HHSDAVLCCS  | LK | --- | AL | P  | VFT | --   | FANQA | GLDMLETTLV |
| Sol_lycATHB-15-like        | -SESILKEIW | DHSDALMCCS  | MK | --- | AL | P  | VFT | --   | FANEA | GLDMLETTLV |
| Gly_maxATHB-8-likeb        | -SESILKSLW | HHSDAVLCCS  | LK | --- | AL | P  | VFT | --   | FANQA | GLDMLETTLV |
| Med_truXP_003603630.1      | -SESILKSLW | HHSDAVLCCS  | LK | --- | AL | P  | VFT | --   | FANQA | GLDMLETTLV |

|                            |             |             |            |     |         |            |
|----------------------------|-------------|-------------|------------|-----|---------|------------|
| AmTr_v1.0_scaffold00148.15 | ALQDISLDKI  | LD-EGGRKSL  | CSDFTKIMQQ | --- | GTYLPA  | GICVSSMGRP |
| AmTr_v1.0_scaffold00056.60 | ALQDITLEKI  | FD-ENGRKTL  | CADFAQIMQQ | --- | GFAYLQG | GLCVSSMGRP |
| AmTr_v1.0_scaffold00155.45 | ALQDITLDDKI | LD-ENGRKVL  | YSEFPKIMQQ | --- | GFAYLPA | GICVSSMGRP |
| Ara_thaPHABULOSA           | ALQDIMLDDKI | LD-EPGRKAL  | CSEFPKIMQQ | --- | GYAHLPA | GVCASSMGRM |
| Ara_thaATHB15              | ALQDISLEKI  | FD-DNGRKTLL | CSEFPQIMQQ | --- | GFACLOG | GICLSSMGRP |
| Ara-thaPHAVOLUTA           | ALQDIMLDDKI | LD-DSGRRAL  | CSEFAKIMQQ | --- | GYANLPA | GICVSSMGRP |
| Ara_thaATHB8               | ALQDITLDDKI | FDNNNGKKTLL | SSEFPQIMQQ | --- | GFMCMDG | GICMSSMGRA |
| Ara_thaREVOLUTA            | ALQDITLEKI  | FD-ESGRKAI  | CSDFAKLMQQ | --- | GFACLPS | GICVSTMGRH |
| Vit_vinHOX32-like          | ALQDIMLDDKI | LD-EAGRKIL  | CSEFSKIMQQ | --- | GFAYLPA | GICTSSMGRP |
| The_cacXP_007022870.1      | ALQDIMLDDKI | LD-EAGRKIL  | CSEFSKIMQQ | --- | GFAYLPA | GICVSSMGRP |
| Ory_sathOX32               | ALQDISLEKI  | LD-DDGRKAL  | CTEFPKIMQQ | --- | GFAYLPG | GVCVSSMGRP |
| Pru_perppa001343mg         | ALQDIMLDDKI | LD-EAGRKIL  | CSEFSKIMQQ | --- | GFAYLPA | GLCASSMGRP |
| Bra_disHOX32-like          | ALQDISLEKI  | LD-DDGRKAL  | CSEFPKIMQQ | --- | GFAYLPG | GVCVSSMGRP |
| Pop_tripHABULOSA           | ALQDIMLDDKI | LD-EAGRKIL  | CSEFSKITQQ | --- | GFAYLPA | GICVSSMGRP |
| Pop_tripHABULOSAb          | ALQDIMLDDKI | LD-EAGRKIL  | CSEFSKIMQQ | --- | GYAYLPA | GICVSSMGRP |
| Fra_vesHOX32-like          | ALQDIMLDDKI | LD-EAGRKVL  | CSEFSKIMLQ | --- | GFAYLPA | GMCASSMGRP |
| Gly_maxATHB-14-like        | ALQDIMLDDKI | LD-ESSRKIL  | CSEFSKIMQQ | --- | GFAYLPA | GICASSMNRP |
| Gly_maxREVOLUTA-like       | ALQDITLDDKI | FD-EAGRKAL  | CTDFAKLMQQ | --- | GFAYLPA | GICMSTMGRH |
| Gly_maxREVOLUTA-likeb      | ALQDITLDDKI | FD-EAGRKAL  | CTDFAKLMQQ | --- | GFAYLPA | GICMSTMGRH |
| Pru_perREV IFL1            | ALQDISLDDKI | FD-ECGRKTL  | CADFAKLMNQ | --- | GFAYLPA | GICMSTMGRH |
| Ory_sathOX33               | NLQDISLEMI  | LD-DEGRKAL  | CSEFPKIMQQ | --- | GFAYLPG | GVCVSSMGRP |
| Sol_tubATHB-14-like        | ALQDIMLDDKI | LD-EAGRKVL  | LSEFSKIMQQ | --- | GFAYLPA | GICVSSMGRP |
| The_cacXP_007022872.1      | ALQDIMLDDKI | LD-EAGRKIL  | CSEFSKIMQQ | --- | VKFSVS  | GLCSSD---- |
| Ory_sathOX33-like          | NLQDISLEMI  | LD-DEGRKAL  | CSEFPKIMQQ | --- | GFAYLPG | GVCVSSMGRP |
| Sol_lycREVOLUTA-like       | ALQDISLDDKI | FD-ESGRKVL  | LSEFAKIMEQ | --- | GFAYLPG | GICMSTMGRH |
| Sol_lycHOX32-like          | ALQDIMLDDKI | LD-EAGRKVL  | LSEFSKIMQQ | --- | GFAYLPA | GICVSSMGRP |
| Gly_maxATHB-14-likeb       | ALQDIMLDDKI | LD-EAGRKFL  | CIEFSKIMQQ | --- | GFAYLPA | GICVSSMNRP |
| Pop_tripXP_006378973.1     | ALQDITLDDKI | FD-ESGRKAL  | FTDFAKLMQQ | ANN | GFAYLPA | GICMSTMGRN |
| Ory_satAC64837.1           | NLQDISLEMI  | LD-DEGRKAL  | CSEFPKIMQQ | --- | GFAYLPG | GVCVSSMGRP |
| Vit_vin013992              | ALQDISLDDKI | FD-ESGRKGL  | CADFAKIMQQ | --- | GFAYLPA | GICMSTMGRH |
| Ory_satOsJ_11861           | ALQDISLEKI  | LD-DDGRKAL  | CTEFPKIMQQ | --- | GFAYLPG | GVCVSSMGRP |
| Sol_tubREVOLUTA-like       | ALQDISLDDKI | FD-EPGREVL  | LSEFAKIMEQ | --- | GFAYLPG | GICMSTMGRH |
| Gly_maxATHB-14-likec       | ALQDIMLDDKI | LD-EAGRKVL  | CIEFSKIMQQ | --- | GFAYLPA | GICVSSMNRP |
| The_cacXP_007024277.1      | ALQDITLDDKI | FD-DHGRKTL  | CTEFPQIMQQ | --- | GFACLOG | GICLSSMGRP |
| Vit_vinATHB-15-like        | ALQDITLDDKI | FD-DHGRKTL  | CSEFPQIMQQ | --- | GFACLOG | GICLSSMGRP |
| Ric_comXP_002515977.1      | ALQDITLDDKI | FD-DHGRKTL  | CSEFPQIMQQ | --- | GFACLOG | GICLSSMGRP |
| The_cacXP_007016751.1      | ALQDITLDDKI | FD-ESGRKAL  | CSDFAKLMQQ | --- | ---     | ---        |
| Sol_tubHOX32-like          | ALQDIMLDDKI | LD-EAGRKVL  | LSEFSKIMQQ | --- | GFAYLPA | GICVSSMGRP |
| Sol_lycATHB-14-like        | ALQDIMLDDKI | LD-EAGRKVL  | LSEFPKIMQQ | --- | GFAYLPA | GLCVSSMGRP |
| Sol_tubATHB-14-like_X1     | ALQDIMLDDKI | LD-EAGRKVL  | LSEFPKIMQQ | --- | GFAYLPA | GLCVSSMGRP |
| Med_truATHB-14             | ALQDIMLDDKI | LD-EAGRKIL  | CSEFSKIMQQ | --- | GYASLPG | GICVSSMNRP |
| Zea_mayNP_001142394.1      | NIQDLPLEAV  | LD-EEGQKAL  | SAQLPAIMQQ | --- | GLAYLPG | GVCRSSMGRP |
| Vit_vinREVOLUTA            | ALQDISLDDKI | FD-ESGRKGL  | CADFAKIMQQ | --- | GFAYLPA | GICMSTMGRH |
| Ory_braHOX32-like          | ALQDISLEKI  | LD-DDGRKAL  | CSEFPKIMQQ | --- | GLAYLPG | GVCVSSMGRP |
| Ric_comXP_002529946.1      | ALQDITLDDKI | FD-ESGRKAL  | CADFAKLMQQ | --- | GFAGLPG | GICMSTMGRH |
| Tha_cacXP_007016749.1      | ALQDITLDDKI | FD-ESGRKAL  | CSDFAKLMQQ | --- | GFAYLPA | GICMSTMGRN |
| Fra_vesREVOLUTA-like       | ALQDISLDDKI | FD-ESGRKTL  | CTDFAKLMQQ | --- | GFAYLPA | GICMSTMGRH |
| Zea_mayNP_001146215.1      | NVQDLQLEAV  | LD-DGGQKAL  | VAQLPKIMLQ | --- | GLAYLPG | GVCRSSMGRP |
| The_cacXP_007012152.1      | ALQDISLEKI  | FD-ENGRKAL  | FAEFPQVMQQ | --- | GFMCLOG | GICLSSMGRP |
| Pru_perppa001386mg         | ALQDITLEKI  | FD-DNGRKTLL | FSEFPQIMQQ | --- | GFMCLOG | GICMSSMGRP |
| Pop_tripAAX19057.1         | ALQDITLEKI  | FD-DNGRKTLL | YSEFPQIMQQ | --- | GFMCLOG | GICLSSMGRP |
| Pop_tripXP_002309538.2     | ALQDITLEKI  | FD-DNGRKTLL | YSEFPQIMQQ | --- | GFMCLOG | GICLSSMGRP |
| Fra_vesATHB-8-like         | ALQDITLEKI  | FD-DNGRKTLL | FTEFPQIMQQ | --- | GFMCLOG | GICMSSMGRP |
| Pop_tripXP_002324794.1     | ALQDITLEKI  | FD-DNGRKTLL | CSEFPQIMQQ | --- | GFMCLOG | GICLSSMGRP |
| Vit_vin009744              | ALQDITLEKT  | FD-DNGRKTLL | CSEFPQIMQQ | --- | GFVCLQG | GVCLSSMGRP |
| Gly_maxATHB-8-like         | ALQDITLEKI  | FD-DNGKKTLL | CTEFPQIMQQ | --- | GFMCLOG | GICLSSMGRP |
| Sol_lycATHB-15-like        | ALQDISLEKI  | FD-DNGRKTLL | YSELQIMQQ  | --- | GFACLOG | GICLSSMGRP |
| Gly_maxATHB-8-likeb        | ALQDITLEKI  | FD-DNGKKTLL | CTEFPQIMQQ | --- | GFMCLOG | GICLSSMGRP |
| Med_truXP_003603630.1      | ALQDITLEKI  | FD-DNGKKTLL | CSEFPQIMQQ | --- | GFMCLOG | GICLSSMGRP |

|                                   |                                       |                         |                         |       |
|-----------------------------------|---------------------------------------|-------------------------|-------------------------|-------|
| AmTr_v1.0_scaffold00148.15        | VS <del>Y</del> DQAI <del>A</del> AWK | VL--TEEEAT              | --HCLAFMFI              | NWSFV |
| AmTr_v1.0_scaffold00056.60        | VS <del>Y</del> ERAVAWK               | VL--NEEEST              | --HCICFMFM              | NWSFV |
| AmTr_v1.0_scaffold00155.45        | VS <del>Y</del> EQAVAWK               | VL--NEDDCT              | --HCLAFMFL              | NWSFV |
| Ara_thaPHABULOSA                  | VS <del>Y</del> EQATVVK               | VL--EDDES <del>N</del>  | --HCLAFMFV              | NWSFV |
| Ara_thaATHB15                     | VS <del>Y</del> ERAVAWK               | VL--NEEENA              | --HCICFVFI              | NWSFV |
| Ara_thaPHAVOLUTA                  | VS <del>Y</del> EQATVVK               | VV--DDNES <del>N</del>  | --HCLAF <del>T</del> LV | SWSFV |
| Ara_thaATHB8                      | VT <del>Y</del> EKAVG <del>W</del> K  | VL--NDEDEP              | --HCICFMFL              | NWSFI |
| Ara_thaREVOLUTA                   | VS <del>Y</del> EQAVAWK               | VFAASEENNN              | NLHCLAFS <del>F</del> V | NWSFV |
| Vit_vinHOX32-like                 | VS <del>Y</del> EQAI <del>A</del> AWK | VL--NDEDS <del>N</del>  | --HCLAFMFI              | NWSFV |
| The_cacXP_007022870.1             | VS <del>Y</del> EQAI <del>A</del> AWK | VL--NDNDAN              | --HCL <del>T</del> FMFV | NWSFV |
| Ory_satHOX32                      | VS <del>Y</del> EQAVAWK               | VL--SDDDT <del>P</del>  | --HCLAFMFV              | NWSFV |
| Pru_perppa001343mg                | VS <del>Y</del> DQAVAWK               | VV--NDDDS <del>N</del>  | --HCLAFMFM              | SWSFV |
| Bra_disHOX32-like                 | VS <del>Y</del> EQAVAWK               | VL--SEDDT <del>P</del>  | --HCLAFMFV              | NWSFV |
| Pop_triPHABULOSA                  | VS <del>Y</del> EQAVAWK               | VL--NDDDS <del>N</del>  | --HCLAFMFM              | NWSFV |
| Pop_triPHABULOSA <del>b</del>     | VS <del>Y</del> EQAI <del>A</del> AWK | VL--NDDNS <del>N</del>  | --HCLAFMFI              | NWSFV |
| Fra_vesHOX32-like                 | VS <del>Y</del> EQAVAWK               | VV--NDEDS <del>N</del>  | --HCLALMFT              | NWSFV |
| Gly_maxATHB-14-like               | VS <del>Y</del> EQAVAWK               | VL--NDDDS <del>N</del>  | --HCLAFMFI              | NWSFV |
| Gly_maxREVOLUTA-like              | VS <del>Y</del> DQAI <del>A</del> AWK | VL <del>T</del> -GEDNTV | --HCLAFSFI              | NWSFV |
| Gly_maxREVOLUTA-like <del>b</del> | VS <del>Y</del> DQAI <del>A</del> AWK | VL <del>T</del> -GEDNTV | --HCLAFSFI              | NWSFV |
| Pru_perREV_IFL1                   | VS <del>Y</del> EQAVAWK               | VLA-AEENS <del>V</del>  | --HCLAFSFM              | NWSFV |
| Ory_satHOX33                      | AS <del>Y</del> EQAVAWK               | VL--SDDDA <del>P</del>  | --HCLAFMLV              | NWTFM |
| Sol_tubATHB-14-like               | IS <del>Y</del> EQAI <del>A</del> AWK | VL--NDDDS <del>N</del>  | --HCLAFMFI              | NWSFV |
| The_cacXP_007022872.1             |                                       | -----IEFFPS             | N-----                  |       |
| Ory_satHOX33-like                 | AS <del>Y</del> EQAVAWK               | VL--SDDDA <del>P</del>  | --HCLAFMLV              | NWTFM |
| Sol_lycREVOLUTA-like              | IS <del>Y</del> EQAI <del>A</del> AWK | VFAASSEENAV             | --HCLAFSFI              | NWSFV |
| Sol_lycHOX32-like                 | IS <del>Y</del> EQAI <del>A</del> AWK | VL--NDDDS <del>N</del>  | --HCLAFMFI              | NWSFV |
| Gly_maxATHB-14-like <del>b</del>  | VS <del>Y</del> EQAI <del>A</del> AWK | VL--DDDS <del>N</del>   | --HCLAFVFM              | NWSFV |
| Pop_triXP_006378973.1             | VS <del>Y</del> EQAV <del>S</del> WK  | VLA-AEENTV              | --HCIAFSFV              | NWSFL |
| Ory_satACA64837.1                 | AS <del>Y</del> EQAVAWK               | VL--SDDDA <del>P</del>  | --HCLAFMLV              | NWTFM |
| Vit_vin013992                     | VS <del>Y</del> EQAI <del>A</del> AWK | VLA-AEENTV              | --HCLAFSFI              | NWSFV |
| Ory_satOsJ_11861                  | VS <del>Y</del> EQAVAWK               | VL--SDDDT <del>P</del>  | --HCLAFMFV              | NWSFV |
| Sol_tubREVOLUTA-like              | IS <del>Y</del> EQAI <del>A</del> AWK | VFAASSEENAV             | --HCLAFSFI              | NWSFV |
| Gly_maxATHB-14-like <del>c</del>  | VS <del>Y</del> EQAI <del>A</del> AWK | VL--DDDS <del>N</del>   | --HCLAFVFM              | NWSFV |
| The_cacXP_007024277.1             | VS <del>Y</del> ERAVAWK               | VL--NEEENA              | --HCICFMFI              | NWSFV |
| Vit_vinATHB-15-like               | VS <del>Y</del> ERAVAWK               | VL--NEEENA              | --HCICFMFM              | NWSFV |
| Ric_comXP_002515977.1             | VS <del>Y</del> ERAVAWK               | VL--NEEENA              | --HCICFMFI              | NWSFV |
| The_cacXP_007016751.1             |                                       | -----VSP                | N-----                  |       |
| Sol_tubHOX32-like                 | IS <del>Y</del> EQAI <del>A</del> AWK | VL--NDDDS <del>N</del>  | --HCLAFMFI              | NWSFV |
| Sol_lycATHB-14-like               | VS <del>Y</del> EQAVAWK               | VL--NDDNS <del>N</del>  | --HCLAFMFT              | NWSFI |
| Sol_tubATHB-14-like_X1            | VS <del>Y</del> EQAVAWK               | VL--NDDNSS              | --HCLAFMFT              | NWSFI |
| Med_truATHB-14                    | VS <del>Y</del> EQAI <del>A</del> AWK | VL--NDDAN               | --HCLAFMFI              | NWSFV |
| Zea_mayNP_001142394.1             | AS <del>Y</del> EQAVAWK               | VV--GDDGAP              | --QCLALMLA              | NWTFI |
| Vit_vinREVOLUTA                   | VS <del>Y</del> EQAI <del>A</del> AWK | VLA-AEENTV              | --HCLAFSFI              | NWSFV |
| Ory_braHOX32-like                 | VS <del>Y</del> EQAVAWK               | VL--SDDDT <del>P</del>  | --HCLAFMFV              | NWSFV |
| Ric_comXP_002529946.1             | VS <del>Y</del> EQAVAWK               | VLA-ADESTV              | --HCLAFS <del>F</del> V | NWSFV |
| Tha_cacXP_007016749.1             | VS <del>Y</del> EQAVAWK               | VLA-ADESTV              | --HCLAFS <del>F</del> V | NWSFV |
| Fra_vesREVOLUTA-like              | VS <del>Y</del> EQAI <del>G</del> WK  | VLS-GEDNSV              | --HCLAFS <del>F</del> V | NWSFV |
| Zea_mayNP_001146215.1             | AS <del>Y</del> EQAVAWK               | VV--GDDGAP              | --QCLALMFV              | NWTFI |
| The_cacXP_007012152.1             | VS <del>Y</del> ERAVAWK               | VV--NDEENA              | --HCICFMFI              | NWSFV |
| Pru_perppa001386mg                | IS <del>Y</del> ERAVAWK               | VL--NEEETA              | --HCICFMFI              | NWSFV |
| Pop_triAAX19057.1                 | VS <del>Y</del> ERAVAWK               | VL--NEEESA              | --HCICFMFI              | NWSFV |
| Pop_triXP_002309538.2             | VS <del>Y</del> ERAVAWK               | VL--NEEESA              | --HCICFMFI              | NWSFV |
| Fra_vesATHB-8-like                | IS <del>Y</del> ERAVAWK               | VL--NEEETA              | --HCICFMFI              | NWSFV |
| Pop_triXP_002324794.1             | VS <del>Y</del> ERAVAWK               | VL--NEEESA              | --HCICFMFM              | NWSFV |
| Vit_vin009744                     | VS <del>Y</del> ERAVAWK               | VL--TEEDNA              | --HCICFMFI              | NWSFV |
| Gly_maxATHB-8-like                | VS <del>Y</del> ERAVAWK               | VL--NEEESA              | --HCICFMFI              | NWSFV |
| Sol_lycATHB-15-like               | IS <del>Y</del> ERAVAWK               | VL--NEEEDA              | --HCICFMFI              | NWSFV |
| Gly_maxATHB-8-like <del>b</del>   | VS <del>Y</del> ERAVAWK               | VL--NEEESA              | --HCICFMFI              | NWSFV |
| Med_truXP_003603630.1             | IT <del>Y</del> ERAVAWK               | VL--NEEESA              | --HCICFMFI              | NWSFV |
