# Supplementary material for: Evidence for the Extensive Conservation of Mechanisms of Ovule Integument Development Since the Most Recent Common Ancestor of Living Angiosperms
Source: PubMed Central journal article supplement (PMC6156155; doi:10.3389/fpls.2018.01352), 2018-09-19
Supplement: Table_1.pdf [file Table_1.pdf]

Supplementary Table 1. Oligonucleotide primers used to amplify *Amborella* integument regulators

|                 |                                                |
|-----------------|------------------------------------------------|
| AtrINO/F        | 5'-ATGTCTTCATGTGAGCAC                          |
| AtrINO/R-T7     | 5'-tgtaatacgactcactatagggcTCACTCATTGTTTTCCATG  |
| AtrATS/F        | 5'-ATGGACATGAGGGCTGGGCA                        |
| AtrATS/R-T7     | 5'-tgtaatacgactcactatagggcTTAGCATTTAAGAAGTGCGA |
| AtrPHB-PHV/F    | 5'-ATGGCGCTTGCTTGCAAAA                         |
| AtrPHB-PHV/R-T7 | 5'-tgtaatacgactcactatagggcCTAAACAAAAGACCAGTTGA |
| AtrREV/F        | 5'-ATGGCAGTAGCTGTACATAA                        |
| AtrREV/R-T7     | 5'-tgtaatacgactcactatagggcTCAAACGAAGGACCAGTTGA |
| AtrARF4/F       | 5'-ATGGAAATTGATCTCAAC                          |
| AtrARF4/R-T7    | 5'-tgtaatacgactcactatagggcCTAACGATGAGCATACTTTG |
| AtrETT/F        | 5'-ATGGGCATTGATCTGAACCG                        |
| AtrETT/R-T7     | 5'-tgtaatacgactcactatagggcTTACACAGCTCTAGCAAGGC |

Sequences shown in lower case on reverse PCR primers correspond to the T7 RNA Polymerase promoter, used subsequently for riboprobe synthesis as described in Vialette-Guiraud et al. (2011).
